# Supplementary material for: Deaminative radical reactions via relayed proton-coupled electron transfer
Source: Royal Society of Chemistry journal article supplement (doi:10.1039/d3qo00192j), 2023-01-01
Supplement: d3qo00192j1.pdf [file d3qo00192j1.pdf]

## Supporting Information

### Deaminative Radical Reactions via Relayed Proton-Coupled Electron Transfer

**Authors:** Qianqian Shi, Kuohong Chen, Limin Guo, Lili Han, Donghui Wei\*, and Yu Lan\*

|           |                                                                                                   |
|-----------|---------------------------------------------------------------------------------------------------|
| <b>I</b>  | <b>Supplementary Methods</b>                                                                      |
| <b>1</b>  | Computational Details                                                                             |
| <b>2</b>  | Gibbs Free Energy Changes of the Stepwise PT-SET and SET-PT Pathways in Case Study 1              |
| <b>3</b>  | The Oxidation Potential                                                                           |
| <b>4</b>  | The Possible Self-Coupling Pathway Between Two <sup>2</sup> M5 Intermediates                      |
| <b>5</b>  | Energy Gap involved in Relayed-PCET Process of Case Study 1                                       |
| <b>6</b>  | Possible Pathways of N-C Bond Cleavage in Case Study 1                                            |
| <b>7</b>  | Open-Shell Singlet and Triplet Diradical Intermediates <sup>os</sup> M9-F and <sup>t</sup> M9-F   |
| <b>8</b>  | Three Dimensional Structures of the Transition States involved in Case Study 1                    |
| <b>9</b>  | Evolution of Spin Population Value during Radical-Radical Cross-Coupling Process in Case Study 1  |
| <b>10</b> | FMO Diagram of Key Structures of Radical-Radical Cross-Coupling Process in Case Study 1           |
| <b>11</b> | The Gibbs Free Energy Changes of the First SET and PT Processes in the SET-PT and PT-SET Pathways |
| <b>12</b> | Possible N-O Bond Cleavage Pathways in Case Studies 2 and 3                                       |
| <b>13</b> | Three Dimensional Structures of the Transition States involved in Other Case Studies              |
| <b>14</b> | ELF Analysis Graphs in a Selected Plane of <sup>2</sup> TS10 along the IRC Results                |
| <b>15</b> | FMO Diagram of Key Structures of Relayed-PCET Process in Other Case Studies                       |
| <b>16</b> | N-N Bond Cleavage Model                                                                           |
| <b>17</b> | Absolute SPE, GFEC, and GFE of the Optimized Structures                                           |
| <b>18</b> | The Energies, Cartesian Coordinates, and Frequencies of the Stationary Points                     |
| <b>II</b> | <b>Supplementary References</b>                                                                   |

## I Supplementary Methods

### 1. Computational Details

All calculations were carried out by using the Gaussian16 program<sup>1</sup>. All the structures were optimized at M06-2X<sup>2</sup> functional with 6-31G(d,p) basis set in dimethyl sulfoxide (DMSO) solvent using the IEF-PCM<sup>3</sup> solvation model. All reactants, products, and intermediates have no imaginary frequency, and each transition state has only one imaginary frequency. The free energies used in discussion were obtained at the M06-2X/6-311++G(d,p)/IEF-PCM<sub>DMSO</sub>//M06-2X/6-31G(d,p)/IEF-PCM<sub>DMSO</sub> level (denoted as L1 level). Diagrams of FMO overlap/interaction changes were drawn by Chemcraft<sup>4</sup>.

To ensure that the selected L1 level can be applied to obtain reliable results, we have additionally performed calculations for the relayed-PCET process involving stationary points **M3** and <sup>os</sup>**TS3** by employing other different methods and basis sets, *i.e.*, M06-2X/6-311+G(d,p)/SMD<sup>5</sup><sub>DMSO</sub>//M06-2X/6-31G(d,p)/IEF-PCM<sub>DMSO</sub> (L2),  $\omega$ B97X-D<sup>6</sup>/6-311+G(d,p)/IEF-PCM<sub>DMSO</sub>//M06-2X/6-31G(d,p)/IEF-PCM<sub>DMSO</sub> (L3), and M06-2X/6-311+G(d,p)/IEF-PCM<sub>DMSO</sub>//M06-2X/6-31G(d,p)/IEF-PCM<sub>DMSO</sub> (L4). As summarized in **Table S1**, there are small differences between the relative Gibbs free energies for the selected stationary points, so it can be concluded that the computed results and computational level L1 are reliable.

**Table S1.** Comparisons of relative Gibbs free energies for selected stationary points at the different levels L1~L4 (unit: kcal/mol).

|                          | L1  | L2  | L3  | L4  |
|--------------------------|-----|-----|-----|-----|
| <b>M3</b>                | 0.0 | 0.0 | 0.0 | 0.0 |
| <sup>os</sup> <b>TS3</b> | 4.2 | 4.3 | 5.9 | 4.2 |

## 2. Gibbs Free Energy Changes of the Stepwise PT-SET and SET-PT Pathways in Case Study 1

### Pathways in Case Study 1

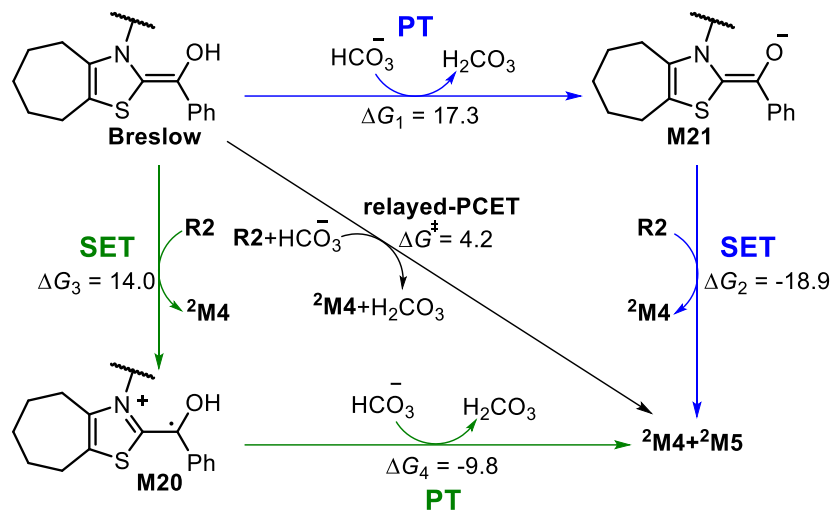

**Fig. S1.** The energy barrier and Gibbs energy changes of the possible pathways (unit: kcal/mol).

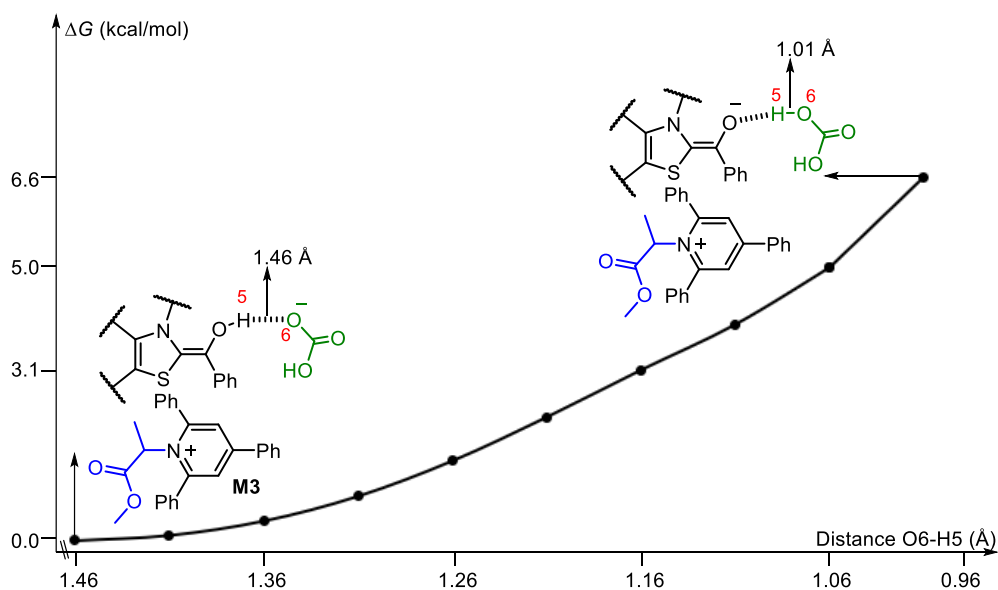

**Fig. S2.** The Gibbs free energy changes by reducing the O6-H5 distance in the first proton transfer process of the stepwise PT-SET pathway.

### 3. The Oxidation Potential

The oxidation potentials of intermediates Breslow, **2M5**, and **R2** substrates (Sub) were calculated the reaction Gibbs free energies of the following reduction half-reaction:

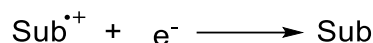

For example, to calculate the oxidation potential of **R2**, the reaction Gibbs free energy of the following reduction half-reactions was calculated using the DFT-computed Gibbs free energies in DMSO solution and the Gibbs free energy of electron ( $-0.867$  kcal/mol).<sup>7</sup>

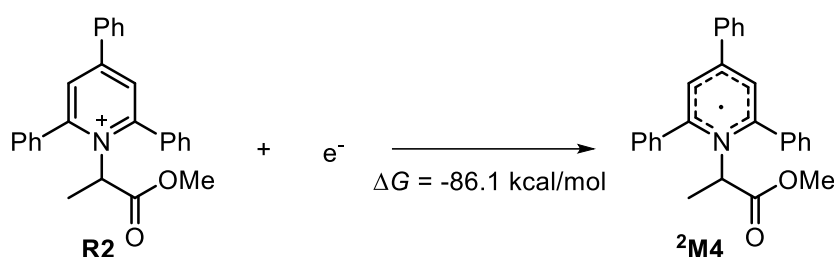

Since  $\Delta G = -nFE$ , where  $n$  is the number of electron transferred (one),  $F$  is the Faraday constant ( $F = 96.485 \text{ kJ mol}^{-1} \text{ V}^{-1} = 23.083 \text{ kcal mol}^{-1} \text{ V}^{-1}$ ), the absolute standard reduction potential can be calculated as:  $E = 4.76 \text{ V}$  Then, the standard potential referenced to the SCE can be calculated from<sup>8</sup>

$$E_{\text{solvent}}^{\ominus, \text{SCE}} = E_{\text{solvent}}^{\ominus, \text{abs}} - E_{\text{SCE}, \text{aq}}^{\text{abs}} + E_L$$

where  $E_{\text{SCE}, \text{aq}}^{\ominus, \text{abs}}$  is the absolute standard potential for the aqueous saturated calomel electrode (4.522 V) and  $E_L$  is the interliquid (intersolvent) potential. Because the experimental value of interliquid potential of toluene is not available, we used the EL value of ethanol (0.030 V).<sup>9</sup> Thus, the oxidation potential of **R2** can be calculated as follows:

$$E_{\text{SCE}, \text{aq}}^{\ominus, \text{abs}} = 3.728 \text{ eV} - 4.522 \text{ V} + 0.030 \text{ V} = -0.76 \text{ V}$$

The oxidation potentials of other substrates were also calculated using this approach. The reaction Gibbs free energies of the following substrate reduction half reactions were calculated using the above method and presented as follows:

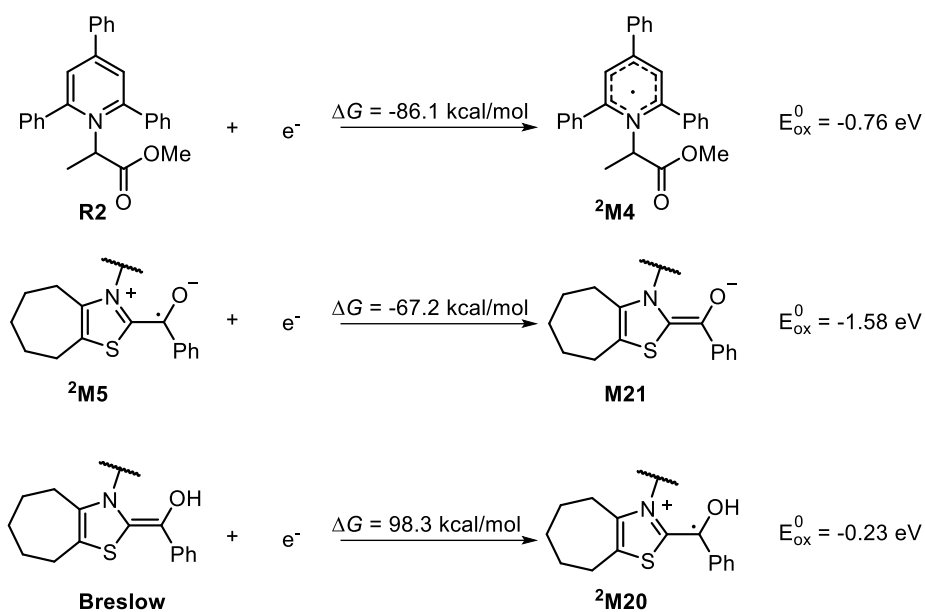

**Fig. S3.** Calculation results of oxidation potentials of the substrates.

#### 4. The Possible Self-Coupling Pathway between Two ${}^2\text{M5}$ Intermediates

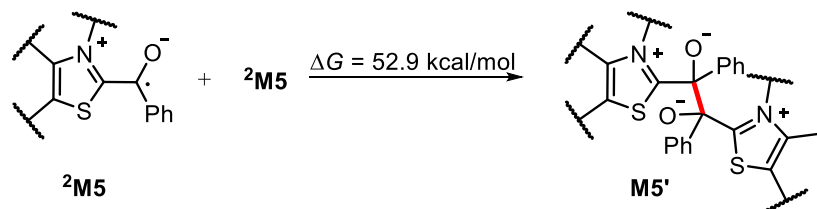

**Fig. S4.** The possible self-coupling pathway between two  ${}^2\text{M5}$  intermediates.

## 5. Energy Gap involved in Relayed-PCET Process of Case Study 1

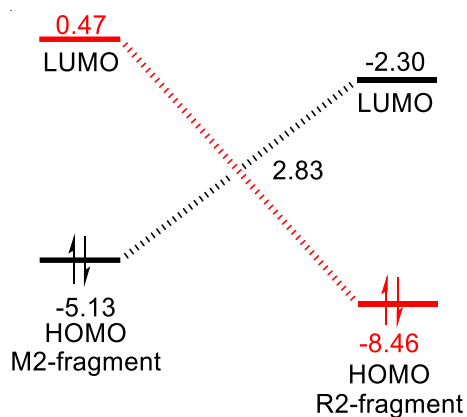

**Scheme S1.** The energy gap between LUMO (R2-fragment) and HOMO (M2-fragment) involved in the relayed-PCET of case study 1. (Unit: eV)

## 6. Possible Pathways of N-C Bond Cleavage in Case Study 1

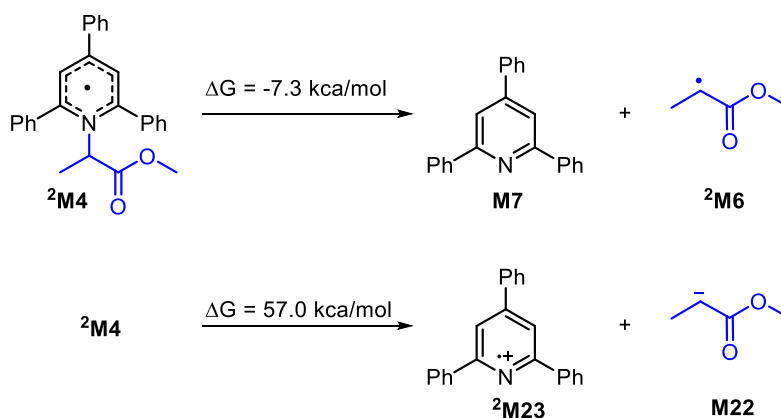

**Scheme S2.** The Gibbs free energy changes of possible pathways of N-C bond cleavage in case study 1.

## 7. Open-Shell Singlet and Triplet Diradical Intermediates $^{\circ\text{S}}\text{M9-F}$ and $^{\text{t}}\text{M9-F}$

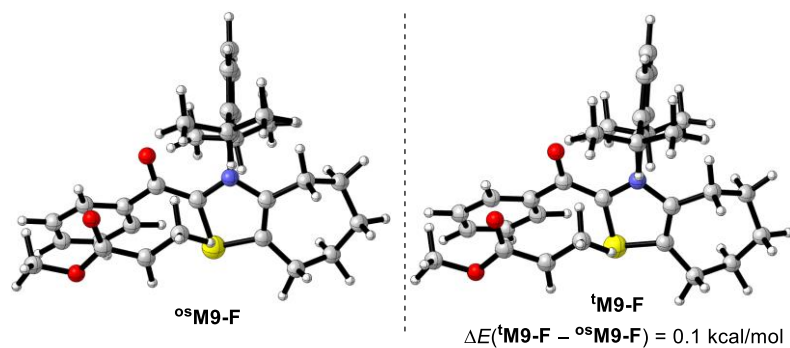

**Fig. S5.** Open-shell singlet and triplet diradical intermediates  $^{\circ\text{S}}\text{M9-F}$  and  $^{\text{t}}\text{M9-F}$ .

## 8. Three Dimensional Structures of the Transition States involved in Case Study 1

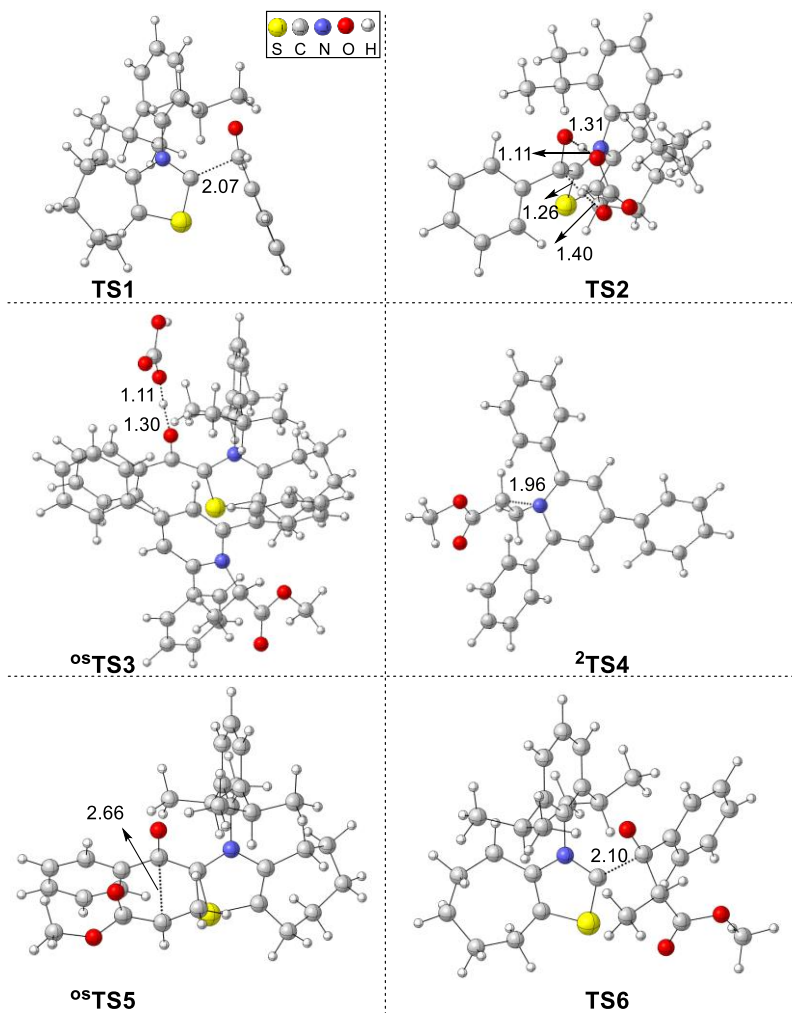

**Fig. S6.** Three dimensional structures of the transition states involved in case study 1.

(unit: Å)



## 9. Evolution of Spin Population Value during Radical-Radical Cross-Coupling Process in Case Study 1

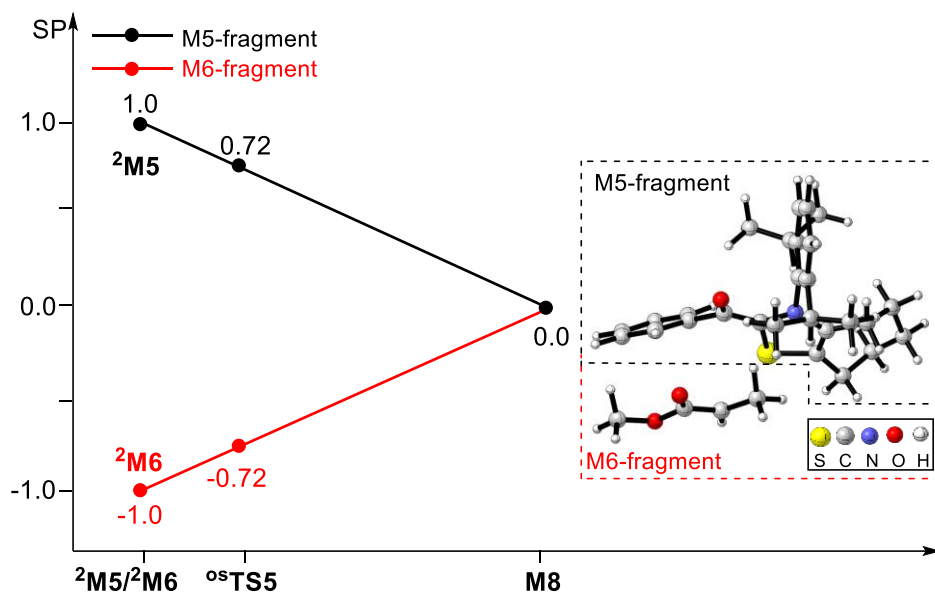

**Fig. S7.** Evolution of spin population (SP) values during radical-radical cross-coupling process. The SP(M5) represents the sum of SP values of the atoms in M5-fragment, and the SP(M6) represents the sum of SP values of atoms in M6-fragment.

## 10. FMO Diagram of Key Structures of Radical-Radical Cross-Coupling Process in Case Study 1

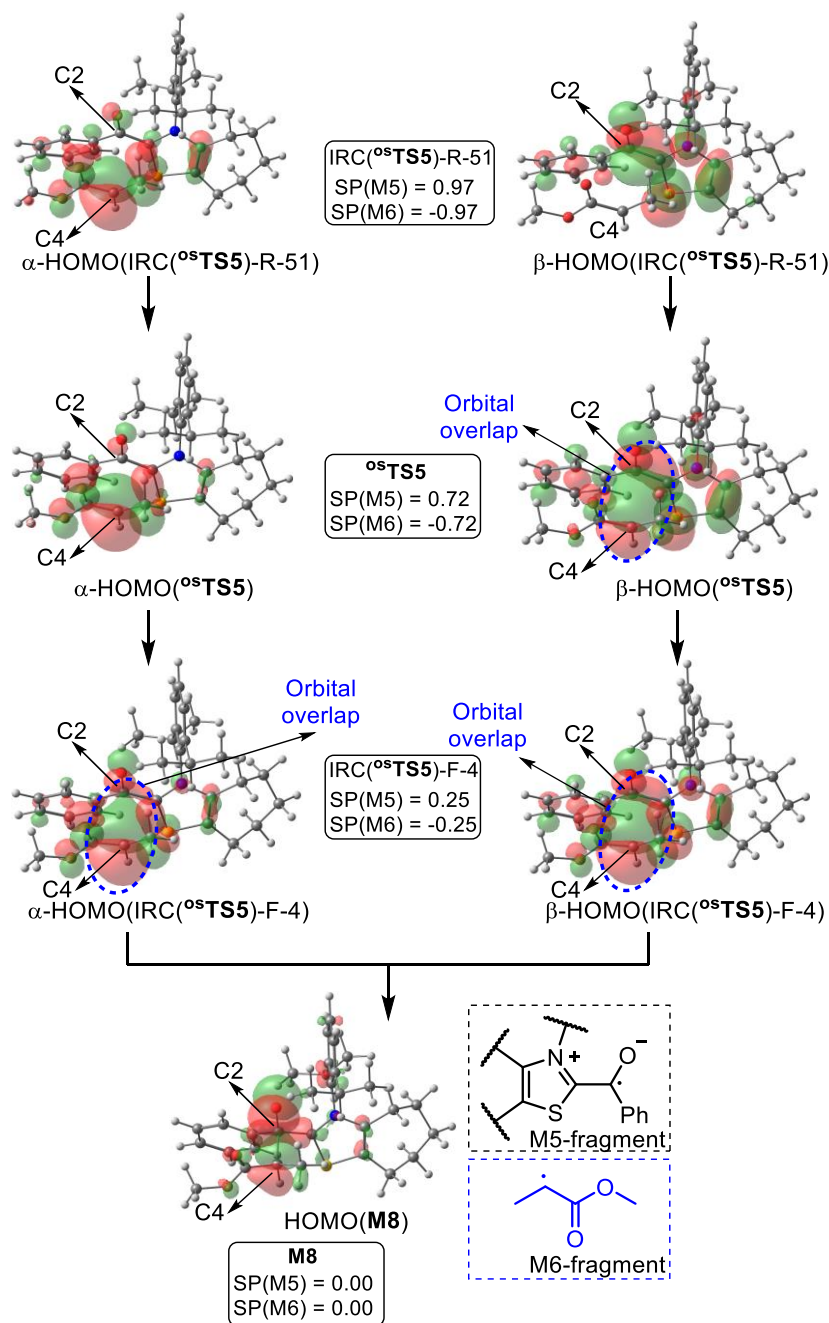

**Fig. S8.** FMO diagram of key structures of radical-radical cross-coupling process (the SP(M5) represents the sum of SP values of the atoms in M5-fragment, and the SP(M6) represents the sum of SP values of atoms in M6-fragment).

## 11. The Gibbs Free Energy Changes of the First SET and PT Processes in the SET-PT and PT-SET Pathways

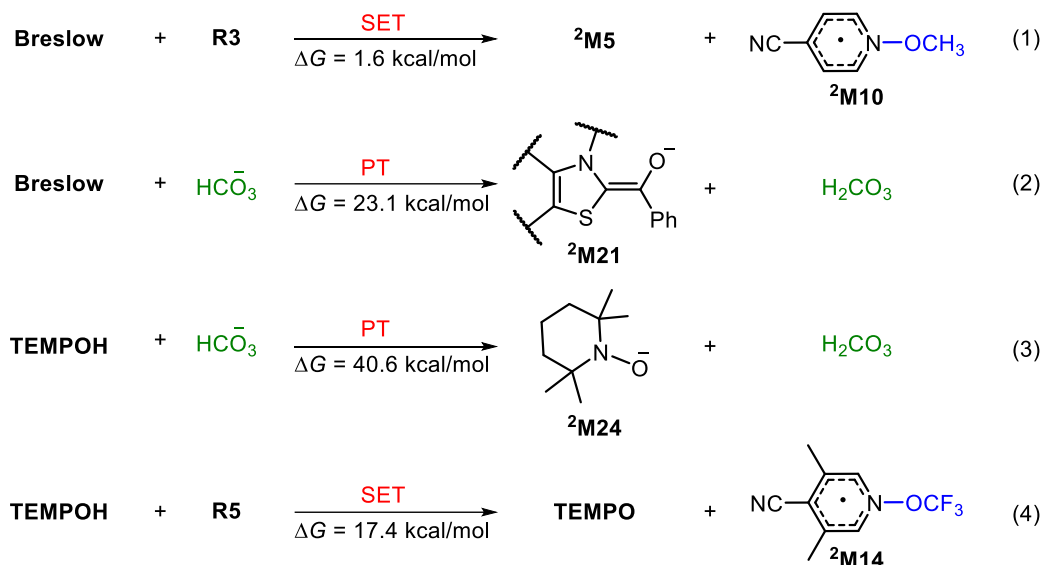

**Scheme S3.** The Gibbs free energy changes of the first SET and PT processes in the stepwise SET-PT and PT-SET pathways in case studies 2-3.

## 12. Possible N-O Bond Cleavage Pathways in Case Studies 2 and 3

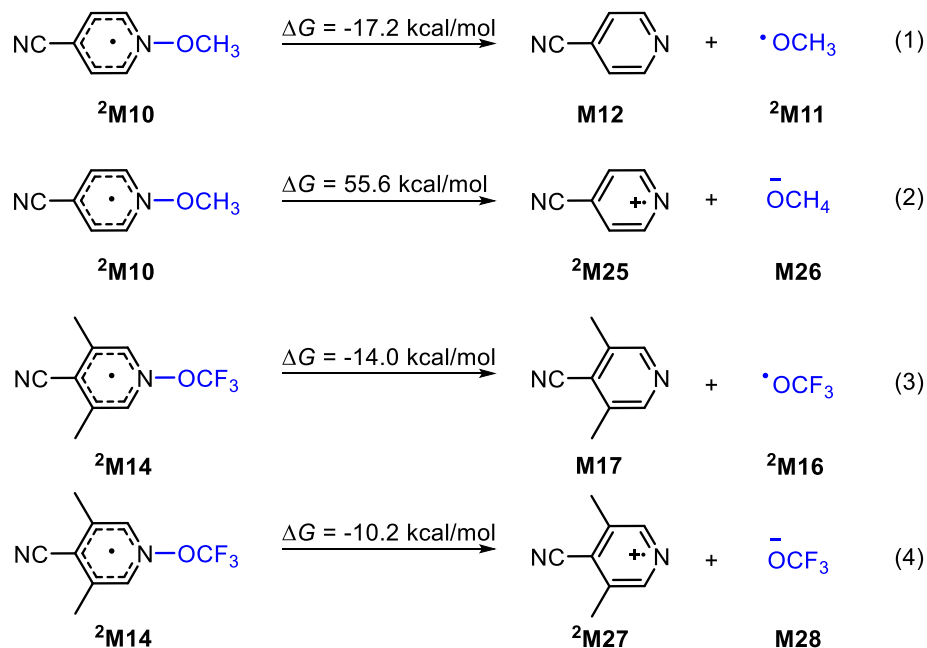

**Scheme S4.** The Gibbs free energy changes of possible N-O bond cleavage pathway in case studies 2 and 3.

### 13. Three Dimensional Structures of the Transition States involved in Other Case Studies

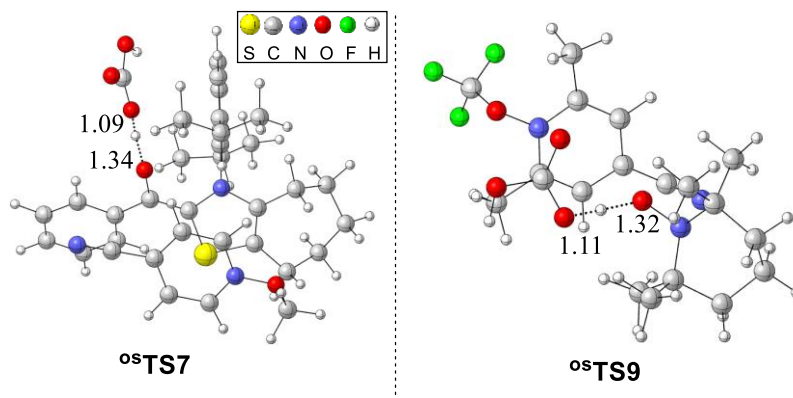

Fig. S9. Three dimensional structures of the transition states involved in other case studies (unit: Å).

### 14. ELF Analysis Graphs in a Selected Plane of $^2\text{TS}_{10}$ along the IRC

#### Results

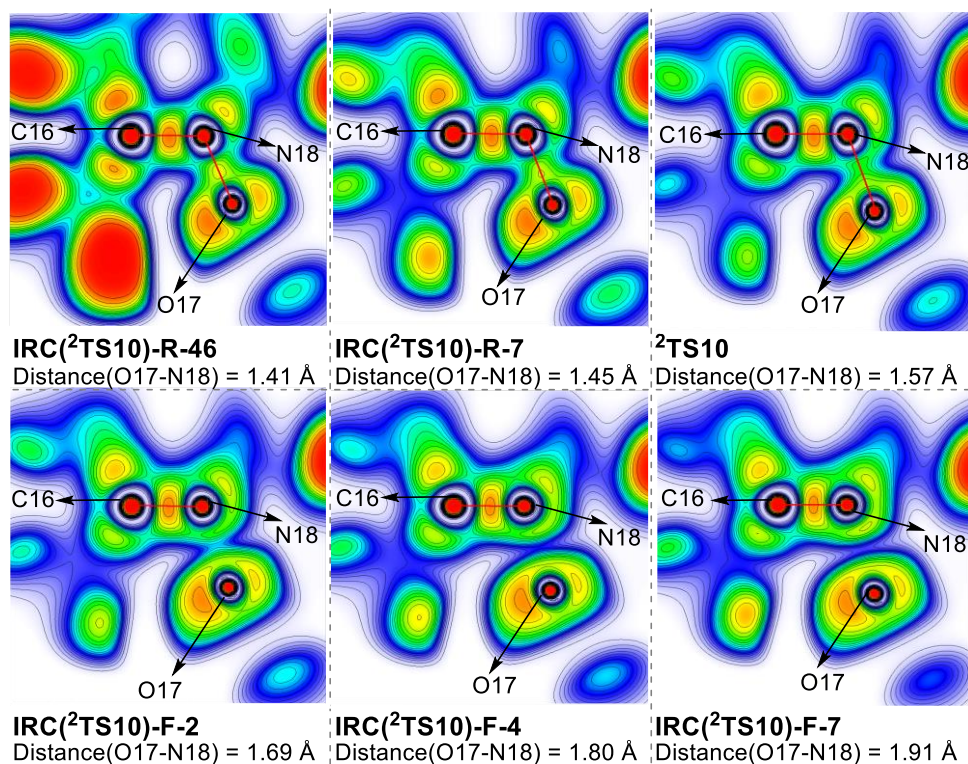

Fig. S10. ELF analysis graphs in a selected plane of  $^2\text{TS}_{10}$  along the IRC results (F represents the forward direction, and R represents the reverse direction).

## 15. FMO Diagram of Key Structures of Relayed-PCET Process in Other Case Studies

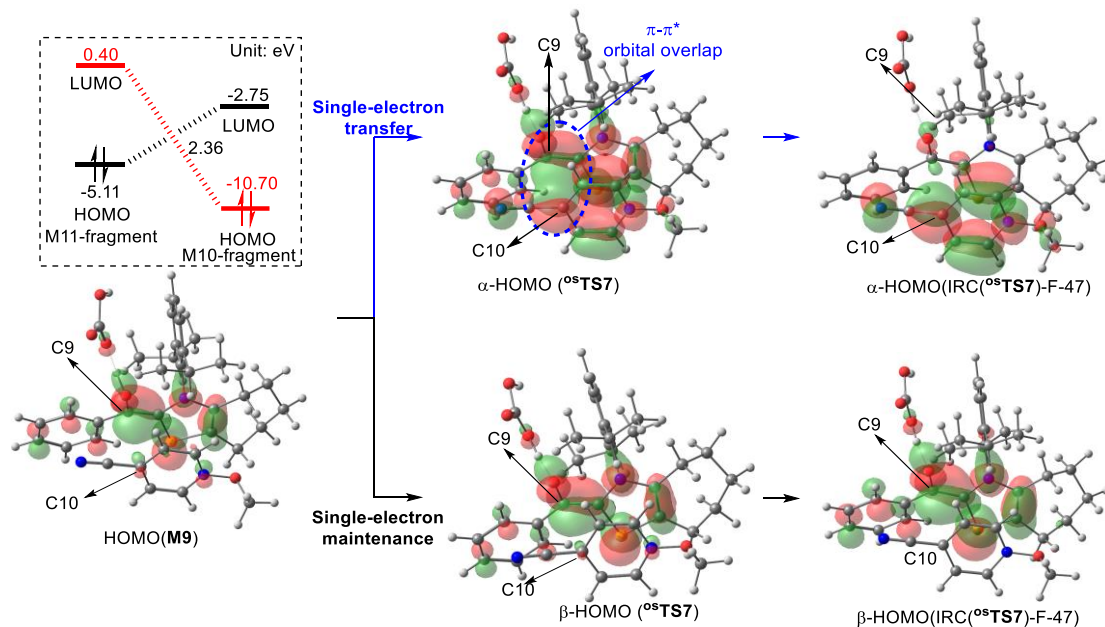

**Fig. S11.** FMO diagram of key structures of relayed-PCET process and energy gap between FMOs involved in transition state  ${}^{\circ}\text{TS7}$  in case study 2.

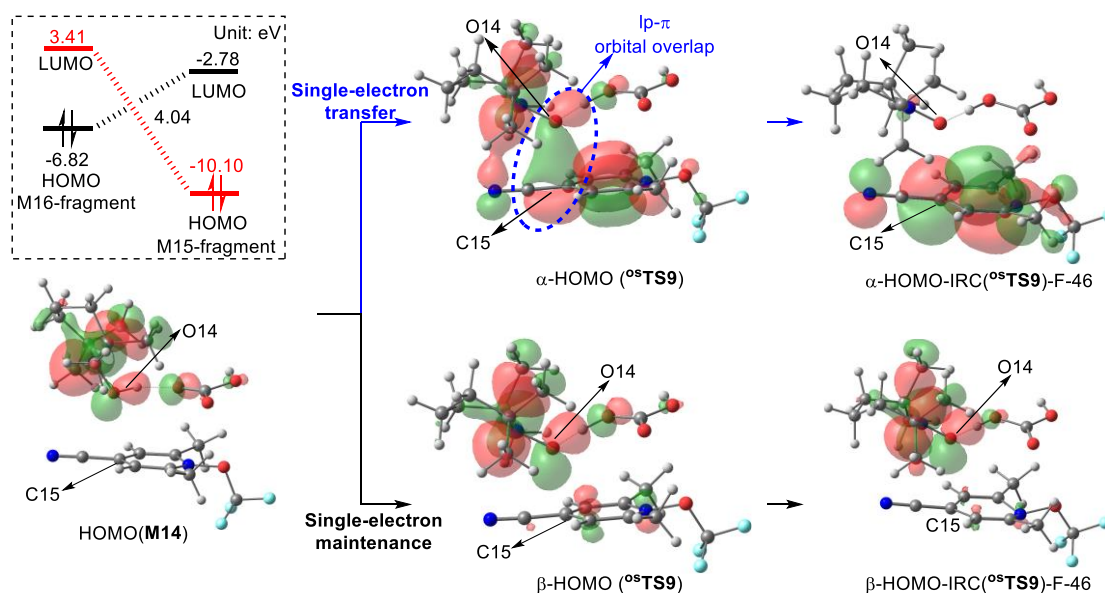

**Fig. S12.** FMO diagram of key structures of relayed-PCET process and energy gap between FMOs involved in transition state  ${}^{\circ}\text{TS9}$  in case study 3.

## 16. N-N Bond Cleavage Model

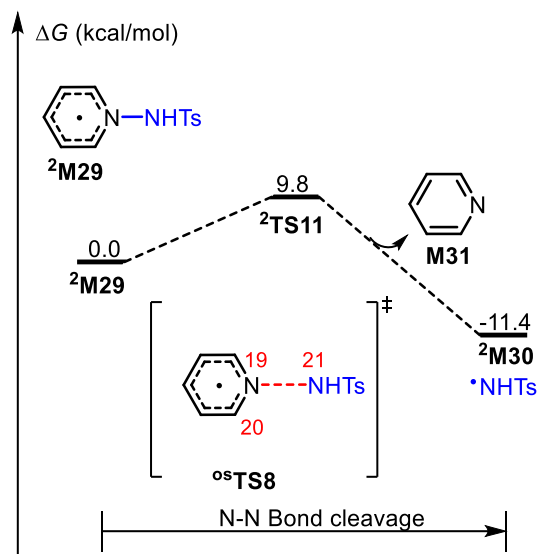

**Fig. S13.** Gibbs free energy profile of the N-N bond cleavage model.

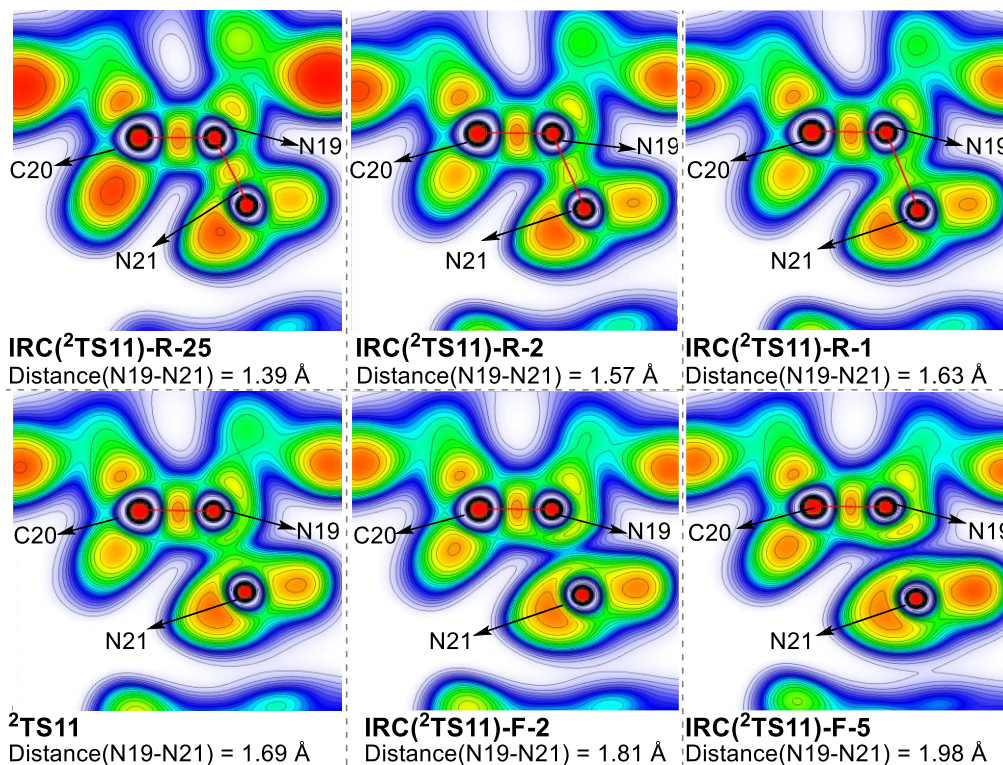

**Fig. S14.** ELF analysis graphs in a selected plane along the IRC results of transition state  ${}^2TS11$  (F represents the forward direction, and R represents the reverse direction).

## 17. Absolute SPE, GFEC, and GFE of the Optimized Structures

**Table S2.** The single-point energies (SPE) at M06-2X/6-311++G(d,p)/IEF-PCM<sub>DMSO</sub> level, Gibbs free energy corrections (GFEC) at M06-2X/6-31G(d,p)/IEF-PCM<sub>DMSO</sub> level, and Gibbs free energies (GFE = SPE + GFEC) of the stationary points involved in case study 1 (unit: a.u.).

|                                | SPE (a.u.)   | GFEC (a.u.) | GFE (a.u.)   |
|--------------------------------|--------------|-------------|--------------|
| pre-NHC                        | -1231.628697 | 0.392991    | -1231.235706 |
| CO <sub>3</sub> <sup>2-</sup>  | -264.046117  | -0.01094    | -264.057057  |
| <b>NHC</b>                     | -1231.150299 | 0.379690    | -1230.770609 |
| <b>R1</b>                      | -345.523172  | 0.080499    | -345.442673  |
| <b>R2</b>                      | -1248.193935 | 0.391717    | -1247.802218 |
| HCO <sub>3</sub> <sup>-</sup>  | -264.552811  | 0.001269    | -264.5515420 |
| H <sub>2</sub> CO <sub>3</sub> | -265.007231  | 0.014281    | -264.99295   |
| <b>TS1</b>                     | -1576.672305 | 0.483485    | -1576.188820 |
| <b>M1</b>                      | -1576.682767 | 0.486590    | -1576.196177 |
| <b>TS2</b>                     | -1841.237011 | 0.502479    | -1840.734532 |
| <b>M2</b>                      | -1841.274106 | 0.509539    | -1840.764567 |
| <b>M3</b>                      | -3089.492459 | 0.928533    | -3088.563926 |
| <sup>os</sup> <b>TS3</b>       | -3089.481146 | 0.923977    | -3088.557169 |
| <sup>2</sup> <b>M4</b>         | -1248.326764 | 0.388789    | -1247.937975 |
| <sup>2</sup> <b>M5</b>         | -1576.10735  | 0.471694    | -1575.635656 |
| <sup>2</sup> <b>TS4</b>        | -1248.300549 | 0.385790    | -1247.914759 |
| <sup>2</sup> <b>M6</b>         | -307.008051  | 0.074222    | -306.933829  |
| <b>M7</b>                      | -941.30564   | 0.286825    | -941.018815  |
| <sup>os</sup> <b>TS8-F</b>     | -1883.127647 | 0.571878    | -1882.555769 |
| <sup>t</sup> <b>TS8-F</b>      | -1883.127436 | 0.570391    | -1882.557045 |
| <sup>os</sup> <b>TS5</b>       | -1883.123939 | 0.573394    | -1882.550545 |
| <b>M8</b>                      | -1883.163045 | 0.580995    | -1882.58205  |
| <b>TS6</b>                     | -1883.148253 | 0.580339    | -1882.567914 |
| <b>P</b>                       | -652.000444  | 0.171494    | -651.82895   |
| <b>M19</b>                     | -1576.705440 | 0.485962    | -1576.219478 |
| <sup>2</sup> <b>M20</b>        | -1576.545884 | 0.484429    | -1576.061455 |

|                             |              |          |              |
|-----------------------------|--------------|----------|--------------|
| <b><sup>2</sup>M21</b>      | -1576.213679 | 0.472393 | -1575.741286 |
| <b>M22</b>                  | -307.145411  | 0.072928 | -307.072483  |
| <b>M23</b>                  | -941.061015  | 0.283380 | -940.777635  |
| <b>M5'</b>                  | -3152.172265 | 0.988252 | -3151.184013 |
| <b>M3(L2)</b>               | -3089.513453 | 0.928533 | -3088.584892 |
| <b><sup>0s</sup>TS3(L2)</b> | -3089.502055 | 0.923977 | -3088.578078 |
| <b>M3(L3)</b>               | -3089.748762 | 0.928533 | -3088.820201 |
| <b><sup>0s</sup>TS3(L3)</b> | -3089.734796 | 0.923977 | -3088.810819 |
| <b>M3(L4)</b>               | -3089.491501 | 0.928533 | -3088.56294  |
| <b><sup>0s</sup>TS3(L4)</b> | -3089.480211 | 0.923977 | -3088.556234 |

**Table S3.** The single-point energies (SPE) at M06-2X/6-311++G(d,p)/IEF-PCM<sub>DMSO</sub> level, Gibbs free energy corrections (GFEC) at M06-2X/6-31G(d,p)/IEF-PCM<sub>DMSO</sub> level, and Gibbs free energies (GFE = SPE + GFEC) of the stationary points involved in other case studies (unit: a.u.).

|                         | SPE (a.u.)   | GFEC (a.u.) | GFE (a.u.)   |
|-------------------------|--------------|-------------|--------------|
| <b>R3</b>               | -455.357978  | 0.099821    | -455.258157  |
| <b>M9</b>               | -2296.655317 | 0.632925    | -2296.022392 |
| <b><sup>0s</sup>TS7</b> | -2296.649054 | 0.628248    | -2296.020806 |
| <b><sup>2</sup>M10</b>  | -455.508796  | 0.095188    | -455.413608  |
| <b><sup>2</sup>M11</b>  | -1576.10735  | 0.471694    | -1575.63566  |
| <b><sup>2</sup>TS8</b>  | -455.489038  | 0.093189    | -455.395849  |
| <b><sup>2</sup>M12</b>  | -340.482216  | 0.014762    | -340.423969  |
| <b>M13</b>              | -115.034831  | 0.058247    | -115.020069  |
| <b>TEMPOH(R4)</b>       | -484.243093  | 0.240265    | -484.002828  |
| <b>R5</b>               | -753.094726  | 0.073157    | -753.021569  |
| <b>M14</b>              | -1580.552346 | 0.410003    | -1580.142343 |
| <b><sup>0s</sup>TS9</b> | -1580.528676 | 0.406399    | -1580.122277 |
| <b><sup>2</sup>M15</b>  | -831.879821  | 0.121982    | -831.757839  |
| <b><sup>2</sup>M16</b>  | -483.631594  | 0.226748    | -483.404846  |
| <b><sup>2</sup>TS10</b> | -831.877933  | 0.121822    | -831.756111  |
| <b><sup>2</sup>M17</b>  | -412.776775  | -0.01174    | -412.788514  |
| <b>M18</b>              | -419.103419  | 0.108726    | -418.994693  |



|                   |              |           |             |
|-------------------|--------------|-----------|-------------|
| <sup>2</sup> M24  | -483.723382  | 0.226687  | -483.496695 |
| <sup>2</sup> M25  | -340.20353   | 0.055983  | -340.147547 |
| <sup>2</sup> M26  | -115.194901  | 0.014416  | -115.180485 |
| <sup>2</sup> M27  | -418.833707  | 0.106480  | -418.727227 |
| <sup>2</sup> M28  | -413.039208  | -0.010650 | -413.04986  |
| <sup>2</sup> M29  | -1122.996281 | 0.189516  | -1122.80677 |
| <sup>2</sup> TS11 | -1122.980146 | 0.188959  | -1122.79119 |
| <sup>2</sup> M30  | -874.751366  | 0.104721  | -874.646645 |
| <sup>2</sup> M31  | -248.243764  | 0.06238   | -248.181384 |

## 18. The Energies, Cartesian Coordinates, and Frequencies of the Stationary Points

pre-NHC

|                                              |          |              |
|----------------------------------------------|----------|--------------|
| Zero-point correction=                       | 0.444143 |              |
| Thermal correction to Energy=                | 0.466116 |              |
| Thermal correction to Enthalpy=              | 0.467060 |              |
| Thermal correction to Gibbs Free Energy=     |          | 0.392991     |
| Sum of electronic and zero-point Energies=   |          | -1230.973736 |
| Sum of electronic and thermal Energies=      |          | -1230.951764 |
| Sum of electronic and thermal Enthalpies=    |          | -1230.950819 |
| Sum of electronic and thermal Free Energies= |          | -1231.024888 |

Cartesian coordinates

|   |           |           |           |
|---|-----------|-----------|-----------|
| C | -3.729114 | 0.412062  | -1.847625 |
| C | -4.265230 | -0.073022 | -0.498388 |
| C | -3.561525 | -1.315252 | 0.066917  |
| C | -2.318583 | 1.006822  | -1.834216 |
| C | -2.170083 | -1.035476 | 0.553604  |
| C | -1.192554 | -0.006498 | -1.576389 |
| C | -1.145840 | -0.480226 | -0.155403 |
| H | -4.414475 | 1.176046  | -2.228191 |
| H | -5.323205 | -0.325507 | -0.617579 |
| H | -3.507056 | -2.093732 | -0.704505 |
| H | -2.260682 | 1.810236  | -1.088688 |
| H | -1.323510 | -0.876632 | -2.231727 |
| C | -0.126999 | -0.799889 | 1.865771  |
| H | -3.761346 | -0.417622 | -2.566675 |
| H | -4.212196 | 0.736721  | 0.238927  |

|   |           |           |           |
|---|-----------|-----------|-----------|
| H | -4.149959 | -1.729901 | 0.889115  |
| H | -2.126140 | 1.465755  | -2.808803 |
| H | -0.225774 | 0.435617  | -1.832134 |
| N | 0.003560  | -0.363693 | 0.623039  |
| C | 1.264618  | 0.174252  | 0.141760  |
| C | 1.435994  | 1.563557  | 0.165562  |
| C | 2.226650  | -0.728945 | -0.325316 |
| C | 2.667677  | 2.051021  | -0.274458 |
| C | 3.439338  | -0.185327 | -0.754854 |
| C | 3.659868  | 1.186545  | -0.724114 |
| H | 2.850405  | 3.121072  | -0.265278 |
| H | 4.217642  | -0.847607 | -1.121330 |
| H | 4.610050  | 1.586705  | -1.061932 |
| C | 0.357367  | 2.518869  | 0.645465  |
| C | 0.054961  | 3.588167  | -0.410780 |
| H | -0.798792 | 4.193725  | -0.094441 |
| H | 0.907758  | 4.259386  | -0.548934 |
| H | -0.181329 | 3.137797  | -1.379738 |
| C | 1.995787  | -2.229185 | -0.385499 |
| S | -1.672258 | -1.391530 | 2.168843  |
| H | -0.566636 | 1.953886  | 0.815241  |
| H | 0.970497  | -2.442230 | -0.065067 |
| C | 0.761260  | 3.160224  | 1.978624  |
| H | 1.678686  | 3.745446  | 1.859337  |
| H | -0.027684 | 3.830847  | 2.329677  |
| H | 0.938693  | 2.401864  | 2.746123  |
| C | 2.947060  | -2.966767 | 0.564050  |
| H | 2.742645  | -4.040518 | 0.541179  |
| H | 3.988820  | -2.814129 | 0.264932  |
| H | 2.835291  | -2.615434 | 1.593390  |
| C | 2.141243  | -2.745948 | -1.821913 |
| H | 1.916702  | -3.815338 | -1.857733 |
| H | 1.459119  | -2.226380 | -2.500562 |
| H | 3.162164  | -2.604309 | -2.189148 |
| H | 0.680142  | -0.765329 | 2.584984  |

Vibrational frequencies

|          |          |          |
|----------|----------|----------|
| 18.4913  | 33.9756  | 49.7700  |
| 64.7518  | 71.5870  | 81.6406  |
| 98.7502  | 113.5461 | 130.1967 |
| 149.3363 | 196.5353 | 218.9578 |
| 222.8461 | 233.0879 | 245.5795 |
| 250.4442 | 254.0616 | 267.1884 |
| 278.7900 | 297.7052 | 308.3173 |

|           |           |           |
|-----------|-----------|-----------|
| 322.9212  | 334.5551  | 358.7808  |
| 376.9377  | 400.9459  | 409.4944  |
| 447.6350  | 467.1427  | 496.1541  |
| 515.4408  | 529.7627  | 562.1224  |
| 580.4966  | 616.7825  | 621.3995  |
| 652.4319  | 659.7425  | 715.5085  |
| 732.2973  | 779.2200  | 789.0298  |
| 812.0291  | 820.6504  | 830.8887  |
| 838.1438  | 839.7226  | 896.5807  |
| 908.8410  | 915.7690  | 933.4374  |
| 937.6509  | 950.4610  | 956.5432  |
| 969.4299  | 973.3201  | 975.6093  |
| 978.2071  | 985.2651  | 1013.1534 |
| 1028.7453 | 1056.4737 | 1074.4545 |
| 1084.8184 | 1093.9608 | 1124.9263 |
| 1128.5851 | 1145.0749 | 1147.6588 |
| 1155.4129 | 1173.2918 | 1184.7909 |
| 1195.1634 | 1211.2078 | 1235.8303 |
| 1249.5772 | 1254.5409 | 1265.9391 |
| 1294.1659 | 1297.8122 | 1303.9671 |
| 1306.9423 | 1330.8290 | 1340.0251 |
| 1346.6234 | 1363.1670 | 1372.0586 |
| 1377.5871 | 1384.5132 | 1397.8292 |
| 1399.7825 | 1408.8639 | 1409.6443 |
| 1411.9297 | 1427.9302 | 1429.6713 |
| 1429.8901 | 1477.0495 | 1479.4758 |
| 1485.2878 | 1488.8252 | 1489.3531 |
| 1492.7648 | 1496.9170 | 1498.2562 |
| 1499.6760 | 1501.6842 | 1507.2189 |
| 1508.5344 | 1510.8894 | 1517.9303 |
| 1533.2737 | 1537.7277 | 1663.6011 |
| 1675.6284 | 1690.8139 | 3054.5095 |
| 3063.2502 | 3063.8489 | 3064.3894 |
| 3066.5266 | 3067.9694 | 3069.7498 |
| 3072.9271 | 3076.7221 | 3083.8400 |
| 3095.1700 | 3114.7567 | 3123.6925 |
| 3126.1999 | 3134.9664 | 3137.0570 |
| 3143.2051 | 3144.8755 | 3145.1515 |
| 3148.8274 | 3151.9358 | 3154.1133 |
| 3154.4049 | 3155.9030 | 3211.6541 |
| 3215.3690 | 3238.4730 | 3288.2666 |

CO<sub>3</sub><sup>2-</sup>

Zero-point correction= 0.014588

|                                              |             |             |
|----------------------------------------------|-------------|-------------|
| Thermal correction to Energy=                | 0.017736    |             |
| Thermal correction to Enthalpy=              | 0.018680    |             |
| Thermal correction to Gibbs Free Energy=     |             | -0.010940   |
| Sum of electronic and zero-point Energies=   |             | -263.876007 |
| Sum of electronic and thermal Energies=      | -263.872859 |             |
| Sum of electronic and thermal Enthalpies=    |             | -263.871914 |
| Sum of electronic and thermal Free Energies= |             | -263.901535 |

Cartesian coordinates

|   |           |           |           |
|---|-----------|-----------|-----------|
| C | -0.000072 | -0.000015 | -0.000222 |
| O | -0.384655 | 1.237683  | 0.000072  |
| O | 1.264661  | -0.285837 | 0.000087  |
| O | -0.879952 | -0.951834 | 0.000008  |

Vibrational frequencies

|           |           |           |
|-----------|-----------|-----------|
| 697.5604  | 702.9251  | 896.7684  |
| 1086.2501 | 1509.3326 | 1510.6341 |

**NHC**

|                                              |                             |
|----------------------------------------------|-----------------------------|
| Zero-point correction=                       | 0.430615 (Hartree/Particle) |
| Thermal correction to Energy=                | 0.452501                    |
| Thermal correction to Enthalpy=              | 0.453446                    |
| Thermal correction to Gibbs Free Energy=     | 0.379690                    |
| Sum of electronic and zero-point Energies=   | -1230.501500                |
| Sum of electronic and thermal Energies=      | -1230.479614                |
| Sum of electronic and thermal Enthalpies=    | -1230.478670                |
| Sum of electronic and thermal Free Energies= | -1230.552426                |

Cartesian coordinates

|   |             |             |             |
|---|-------------|-------------|-------------|
| C | -3.66272200 | 0.32587500  | -1.98169700 |
| C | -4.23460900 | -0.03598400 | -0.60760400 |
| C | -3.57465300 | -1.24651200 | 0.06637100  |
| C | -2.23106000 | 0.86986300  | -1.99860900 |
| C | -2.18492400 | -0.96958500 | 0.56086300  |
| C | -1.14669200 | -0.14877300 | -1.61837900 |
| C | -1.14097500 | -0.49638600 | -0.15712500 |
| H | -4.31769600 | 1.07732000  | -2.43592300 |
| H | -5.30021100 | -0.25815500 | -0.72867700 |
| H | -3.54533500 | -2.08429400 | -0.64342500 |
| H | -2.15706500 | 1.74087900  | -1.33408700 |
| H | -1.29428000 | -1.06745100 | -2.20250100 |
| C | -0.04994200 | -0.65844500 | 1.95974100  |
| H | -3.71224100 | -0.55902100 | -2.63154300 |
| H | -4.16463500 | 0.82884300  | 0.06367100  |

|   |             |             |             |
|---|-------------|-------------|-------------|
| H | -4.19177500 | -1.57489000 | 0.90758200  |
| H | -2.01269500 | 1.22704500  | -3.01057700 |
| H | -0.16544700 | 0.24235800  | -1.89865000 |
| N | 0.00672900  | -0.34355400 | 0.65180300  |
| C | 1.24228800  | 0.16942800  | 0.10460300  |
| C | 1.43104900  | 1.55730600  | 0.07900100  |
| C | 2.18560700  | -0.73997200 | -0.39040700 |
| C | 2.64146200  | 2.03336400  | -0.42957000 |
| C | 3.38196800  | -0.21777100 | -0.88825800 |
| C | 3.60985200  | 1.15409300  | -0.90315000 |
| H | 2.82955600  | 3.10192500  | -0.45705900 |
| H | 4.14260000  | -0.89055100 | -1.27124600 |
| H | 4.54558900  | 1.54138900  | -1.29361800 |
| C | 0.37707100  | 2.50156900  | 0.63117500  |
| C | 0.24657700  | 3.79105000  | -0.18175500 |
| H | -0.60602700 | 4.37184700  | 0.18120500  |
| H | 1.13565200  | 4.42184500  | -0.08603700 |
| H | 0.09073800  | 3.57841700  | -1.24373300 |
| C | 1.93470000  | -2.23734600 | -0.34263700 |
| S | -1.66896500 | -1.19470500 | 2.21078500  |
| H | -0.59059700 | 1.98767800  | 0.58805600  |
| H | 0.85012400  | -2.39435900 | -0.31477700 |
| C | 0.67640500  | 2.80400800  | 2.10563500  |
| H | 1.64430800  | 3.30857300  | 2.19752900  |
| H | -0.09277800 | 3.45776900  | 2.52782100  |
| H | 0.71080600  | 1.87809400  | 2.68664400  |
| C | 2.52428900  | -2.82115300 | 0.94853800  |
| H | 2.32326400  | -3.89496500 | 1.01088100  |
| H | 3.60952200  | -2.67348300 | 0.96754300  |
| H | 2.09073300  | -2.32929800 | 1.82366500  |
| C | 2.47467600  | -2.97061700 | -1.57226400 |
| H | 2.15946300  | -4.01734900 | -1.54513600 |
| H | 2.10409200  | -2.52325700 | -2.49898900 |
| H | 3.56848600  | -2.96083000 | -1.60063400 |

#### Vibrational frequencies

|          |          |          |
|----------|----------|----------|
| 30.6652  | 36.3525  | 44.7363  |
| 51.5413  | 61.5298  | 79.2986  |
| 92.0407  | 117.8646 | 135.7067 |
| 148.4748 | 198.8582 | 219.5350 |
| 224.2794 | 241.4155 | 243.9346 |
| 257.8909 | 272.8022 | 280.1228 |
| 291.4385 | 301.2863 | 304.3275 |
| 326.6450 | 335.6607 | 361.9138 |

|           |           |           |
|-----------|-----------|-----------|
| 376.6960  | 396.1840  | 409.7612  |
| 440.5363  | 470.8475  | 495.1424  |
| 516.2215  | 529.7680  | 566.0188  |
| 570.8222  | 612.5212  | 621.9385  |
| 652.7658  | 653.8466  | 708.1731  |
| 723.6484  | 774.5234  | 786.4683  |
| 808.9275  | 819.2492  | 829.9985  |
| 833.6334  | 837.1077  | 901.1252  |
| 914.4995  | 922.9782  | 930.3512  |
| 933.1414  | 940.2055  | 966.3958  |
| 969.0953  | 977.8054  | 979.5297  |
| 981.4751  | 1007.0160 | 1017.0537 |
| 1060.7083 | 1074.9593 | 1084.7572 |
| 1095.9962 | 1122.5673 | 1126.5669 |
| 1146.9404 | 1152.8398 | 1158.6946 |
| 1171.8629 | 1181.1645 | 1193.9552 |
| 1213.1049 | 1237.2670 | 1246.1235 |
| 1250.8083 | 1285.5271 | 1295.5326 |
| 1298.3771 | 1304.3867 | 1324.6077 |
| 1329.2803 | 1338.2137 | 1344.1279 |
| 1367.4427 | 1375.4948 | 1382.2325 |
| 1390.0150 | 1397.6810 | 1398.9350 |
| 1400.7957 | 1402.9711 | 1409.7124 |
| 1413.8149 | 1420.4858 | 1424.2852 |
| 1477.0639 | 1481.7042 | 1484.4789 |
| 1488.4841 | 1490.8366 | 1491.9122 |
| 1493.8788 | 1495.6190 | 1499.8589 |
| 1506.4263 | 1510.6395 | 1513.3643 |
| 1515.8803 | 1528.7524 | 1533.8350 |
| 1678.0809 | 1688.2002 | 1697.9190 |
| 3051.1107 | 3052.2919 | 3053.1161 |
| 3053.4607 | 3054.8009 | 3059.6570 |
| 3061.3001 | 3062.2917 | 3065.9122 |
| 3077.4787 | 3081.2242 | 3104.2037 |
| 3110.0690 | 3112.7366 | 3123.2924 |
| 3132.4111 | 3134.8918 | 3136.5305 |
| 3140.6919 | 3143.9348 | 3145.5796 |
| 3151.2875 | 3151.5722 | 3152.1310 |
| 3212.6255 | 3221.3965 | 3239.2039 |

## R1

Zero-point correction= 0.111049 (Hartree/Particle)

Thermal correction to Energy= 0.117334

Thermal correction to Enthalpy= 0.118278

Thermal correction to Gibbs Free Energy= 0.080499  
 Sum of electronic and zero-point Energies= -345.322585  
 Sum of electronic and thermal Energies= -345.316300  
 Sum of electronic and thermal Enthalpies= -345.315356  
 Sum of electronic and thermal Free Energies= -345.353135

Cartesian coordinates

|   |             |             |             |
|---|-------------|-------------|-------------|
| C | 1.98641200  | 0.47192700  | -0.00009000 |
| O | 2.83174700  | -0.39831900 | 0.00013500  |
| H | 2.27413700  | 1.54194400  | -0.00032600 |
| C | 0.52973900  | 0.21403900  | -0.00004400 |
| C | -0.35772300 | 1.29151200  | 0.00000900  |
| C | 0.04826800  | -1.09902200 | -0.00005600 |
| C | -1.72997300 | 1.05869300  | 0.00004100  |
| H | 0.02939000  | 2.30737100  | 0.00002300  |
| C | -1.32086200 | -1.32965700 | -0.00002000 |
| H | 0.76005600  | -1.91869300 | -0.00009800 |
| C | -2.20805500 | -0.25049100 | 0.00002700  |
| H | -2.42400100 | 1.89228300  | 0.00008200  |
| H | -1.70244400 | -2.34525400 | -0.00002000 |
| H | -3.27795200 | -0.43311100 | 0.00005600  |

Vibrational frequencies

|           |           |           |
|-----------|-----------|-----------|
| 116.5577  | 221.0833  | 244.9528  |
| 417.6797  | 445.8006  | 463.4758  |
| 623.9146  | 658.2830  | 707.3335  |
| 769.5227  | 847.1859  | 879.1974  |
| 959.0281  | 1011.0752 | 1018.9834 |
| 1037.2456 | 1054.9485 | 1059.6937 |
| 1113.1739 | 1180.4337 | 1189.1914 |
| 1249.2144 | 1339.1209 | 1367.7703 |
| 1436.6740 | 1507.4746 | 1546.9024 |
| 1678.2032 | 1695.1844 | 1833.2983 |
| 2998.5849 | 3197.5311 | 3207.5875 |
| 3215.1394 | 3223.3536 | 3229.9012 |

**R2**

|                                            |              |              |
|--------------------------------------------|--------------|--------------|
| Zero-point correction=                     | 0.448577     |              |
| Thermal correction to Energy=              | 0.473995     |              |
| Thermal correction to Enthalpy=            | 0.474939     |              |
| Thermal correction to Gibbs Free Energy=   |              | 0.391717     |
| Sum of electronic and zero-point Energies= |              | -1247.455532 |
| Sum of electronic and thermal Energies=    | -1247.430115 |              |
| Sum of electronic and thermal Enthalpies=  |              | -1247.429170 |

Sum of electronic and thermal Free Energies=

-1247.512393

Cartesian coordinates

|   |           |           |           |
|---|-----------|-----------|-----------|
| N | 0.525343  | 0.297061  | 0.338597  |
| C | 0.172644  | -1.022023 | 0.234657  |
| C | -1.152437 | -1.372976 | 0.073736  |
| H | -1.381712 | -2.426805 | -0.030400 |
| C | -2.160555 | -0.404224 | 0.002389  |
| C | -1.753322 | 0.929534  | 0.047770  |
| H | -2.472043 | 1.736356  | -0.031126 |
| C | -0.421251 | 1.274618  | 0.202009  |
| C | -3.579137 | -0.775668 | -0.149601 |
| C | -4.064764 | -1.954337 | 0.431169  |
| H | -3.402394 | -2.585965 | 1.014991  |
| C | -5.404409 | -2.298987 | 0.296564  |
| H | -5.775525 | -3.206649 | 0.759986  |
| C | -6.267524 | -1.478904 | -0.428106 |
| H | -7.311980 | -1.751905 | -0.536097 |
| C | -5.789004 | -0.309182 | -1.015539 |
| H | -6.455215 | 0.325532  | -1.589629 |
| C | -4.453032 | 0.045769  | -0.873503 |
| H | -4.082958 | 0.946325  | -1.353484 |
| C | 1.206243  | -2.097540 | 0.216312  |
| C | 1.796207  | -2.435638 | -1.005925 |
| H | 1.528624  | -1.884967 | -1.902415 |
| C | 2.722904  | -3.471602 | -1.063397 |
| H | 3.184009  | -3.727672 | -2.011639 |
| C | 3.046860  | -4.182829 | 0.090098  |
| H | 3.773002  | -4.987482 | 0.043672  |
| C | 2.422737  | -3.877834 | 1.297354  |
| H | 2.653919  | -4.447811 | 2.190489  |
| C | 1.491720  | -2.845216 | 1.361312  |
| H | 0.987178  | -2.620224 | 2.296039  |
| C | -0.050084 | 2.712558  | 0.194568  |
| C | 0.790027  | 3.219253  | -0.804966 |
| H | 1.220404  | 2.545083  | -1.540651 |
| C | 1.064553  | 4.581161  | -0.846479 |
| H | 1.712621  | 4.974652  | -1.621886 |
| C | 0.505734  | 5.436865  | 0.102393  |
| H | 0.724759  | 6.498760  | 0.068026  |
| C | -0.333894 | 4.932541  | 1.092143  |
| H | -0.767831 | 5.597862  | 1.830467  |
| C | -0.620085 | 3.570992  | 1.137395  |
| H | -1.274516 | 3.170732  | 1.905596  |



|   |          |           |           |
|---|----------|-----------|-----------|
| C | 1.898682 | 0.678136  | 0.791326  |
| H | 1.944944 | 1.761988  | 0.691757  |
| C | 2.140350 | 0.334520  | 2.252972  |
| H | 2.252911 | -0.735976 | 2.412640  |
| H | 1.318569 | 0.717020  | 2.861401  |
| C | 2.992548 | 0.170954  | -0.140052 |
| O | 4.041406 | -0.275832 | 0.247032  |
| O | 2.677684 | 0.397011  | -1.415180 |
| C | 3.689822 | 0.035794  | -2.368866 |
| H | 3.254352 | 0.225244  | -3.346744 |
| H | 4.579592 | 0.647286  | -2.213133 |
| H | 3.946364 | -1.019230 | -2.254199 |
| H | 3.063606 | 0.824571  | 2.564961  |

#### Vibrational frequencies

|          |          |          |
|----------|----------|----------|
| 17.7218  | 37.8229  | 41.0889  |
| 48.4306  | 54.1346  | 54.6661  |
| 64.7461  | 86.1950  | 101.7549 |
| 105.8849 | 121.0093 | 124.7039 |
| 156.2979 | 159.4577 | 173.0448 |
| 214.3189 | 226.8632 | 234.8340 |
| 236.3252 | 244.4039 | 269.0167 |
| 273.2308 | 284.9886 | 297.8209 |
| 342.8781 | 360.2395 | 408.6301 |
| 414.8495 | 415.8671 | 419.1734 |

#### HCO<sub>3</sub><sup>-</sup>

|                                              |             |             |
|----------------------------------------------|-------------|-------------|
| Zero-point correction=                       | 0.027008    |             |
| Thermal correction to Energy=                | 0.030497    |             |
| Thermal correction to Enthalpy=              | 0.031441    |             |
| Thermal correction to Gibbs Free Energy=     |             | 0.001269    |
| Sum of electronic and zero-point Energies=   |             | -264.412028 |
| Sum of electronic and thermal Energies=      | -264.408538 |             |
| Sum of electronic and thermal Enthalpies=    |             | -264.407594 |
| Sum of electronic and thermal Free Energies= |             | -264.437767 |

#### Cartesian coordinates

|   |             |             |             |
|---|-------------|-------------|-------------|
| C | -0.13741900 | 0.06246000  | 0.00005300  |
| O | 0.09021200  | 1.29047100  | 0.00000200  |
| O | 1.00492300  | -0.75708100 | 0.00001600  |
| H | 1.74622700  | -0.13923200 | 0.00004000  |
| O | -1.21034900 | -0.56283000 | -0.00006300 |

#### Vibrational frequencies

|           |           |           |
|-----------|-----------|-----------|
| 505.6855  | 572.4718  | 671.5362  |
| 829.0561  | 970.5900  | 1212.2796 |
| 1393.5246 | 1825.3832 | 3874.4270 |

H<sub>2</sub>CO<sub>3</sub>

|                                              |             |             |
|----------------------------------------------|-------------|-------------|
| Zero-point correction=                       | 0.040178    |             |
| Thermal correction to Energy=                | 0.043908    |             |
| Thermal correction to Enthalpy=              | 0.044852    |             |
| Thermal correction to Gibbs Free Energy=     |             | 0.014281    |
| Sum of electronic and zero-point Energies=   |             | -264.874761 |
| Sum of electronic and thermal Energies=      | -264.871031 |             |
| Sum of electronic and thermal Enthalpies=    |             | -264.870087 |
| Sum of electronic and thermal Free Energies= |             | -264.900657 |

Cartesian coordinates

|   |           |           |           |
|---|-----------|-----------|-----------|
| C | -0.000020 | 0.097899  | 0.000021  |
| O | 0.000262  | 1.305138  | -0.000025 |
| O | -1.082419 | -0.677035 | -0.000029 |
| H | -1.857193 | -0.096315 | -0.000084 |
| O | 1.082180  | -0.677378 | 0.000043  |
| H | 1.857135  | -0.096880 | 0.000047  |

Vibrational frequencies

|           |           |           |
|-----------|-----------|-----------|
| 484.3474  | 561.8535  | 568.9412  |
| 608.0518  | 803.9819  | 1032.5632 |
| 1173.0469 | 1294.4879 | 1510.0888 |
| 1878.5695 | 3858.2215 | 3861.8533 |

**TS1**

|                                              |              |              |
|----------------------------------------------|--------------|--------------|
| Zero-point correction=                       | 0.543678     |              |
| Thermal correction to Energy=                | 0.572385     |              |
| Thermal correction to Enthalpy=              | 0.573329     |              |
| Thermal correction to Gibbs Free Energy=     |              | 0.483485     |
| Sum of electronic and zero-point Energies=   |              | -1575.822426 |
| Sum of electronic and thermal Energies=      | -1575.793719 |              |
| Sum of electronic and thermal Enthalpies=    |              | -1575.792775 |
| Sum of electronic and thermal Free Energies= |              | -1575.882619 |

Cartesian coordinates

|   |             |            |             |
|---|-------------|------------|-------------|
| C | -3.85968200 | 3.30898300 | 0.16113600  |
| C | -2.59782700 | 4.10134700 | -0.18792400 |
| C | -1.36371600 | 3.73763900 | 0.64602700  |
| C | -3.83771100 | 1.82591500 | -0.21651700 |
| C | -0.79732100 | 2.37985400 | 0.34316900  |

|   |             |             |             |
|---|-------------|-------------|-------------|
| C | -2.89753700 | 0.94581900  | 0.61918500  |
| C | -1.44099100 | 1.18702800  | 0.34622700  |
| H | -4.70814300 | 3.77668900  | -0.34958200 |
| H | -2.80173800 | 5.16542300  | -0.02990200 |
| H | -1.62303300 | 3.78137400  | 1.71226400  |
| H | -3.57704900 | 1.72237500  | -1.27745500 |
| H | -3.09496000 | 1.11218400  | 1.68721500  |
| C | 0.72267000  | 0.43563500  | -0.18467900 |
| H | -4.05736000 | 3.40318400  | 1.23789300  |
| H | -2.36389700 | 3.97640100  | -1.25212100 |
| H | -0.58431300 | 4.48810200  | 0.48673500  |
| H | -4.84925700 | 1.42413600  | -0.09911900 |
| H | -3.12342600 | -0.10550700 | 0.42283700  |
| N | -0.55130700 | 0.12833800  | 0.05933200  |
| C | -0.99018600 | -1.25386300 | 0.08932900  |
| C | -1.33329300 | -1.88641300 | -1.10640200 |
| C | -1.07756200 | -1.87745300 | 1.34277800  |
| C | -1.81256500 | -3.19754900 | -1.02269000 |
| C | -1.55518000 | -3.18714400 | 1.37530900  |
| C | -1.92751900 | -3.83951600 | 0.20253400  |
| H | -2.09482300 | -3.71946100 | -1.93268700 |
| H | -1.63799700 | -3.70592600 | 2.32439700  |
| H | -2.30356200 | -4.85664900 | 0.24746900  |
| C | -1.18304900 | -1.21986300 | -2.46041100 |
| C | -2.54801200 | -0.99745000 | -3.12118500 |
| H | -2.42802300 | -0.49274200 | -4.08427200 |
| H | -3.05244300 | -1.95255800 | -3.30096100 |
| H | -3.19901900 | -0.38539700 | -2.48943800 |
| C | -0.58363600 | -1.17626100 | 2.59642700  |
| S | 0.88308500  | 2.12915800  | -0.04005700 |
| H | -0.71797500 | -0.23973800 | -2.31336000 |
| H | -0.75085300 | -0.09957700 | 2.47489400  |
| C | -0.25687500 | -2.04854700 | -3.36078600 |
| H | -0.74510700 | -2.97874300 | -3.67014100 |
| H | -0.00524400 | -1.48822000 | -4.26604600 |
| H | 0.66280600  | -2.30741300 | -2.82802000 |
| C | 0.92989300  | -1.40138600 | 2.73294200  |
| H | 1.32666400  | -0.83674300 | 3.58217300  |
| H | 1.13207700  | -2.46503300 | 2.90111600  |
| H | 1.45718200  | -1.10240100 | 1.82154700  |
| C | -1.31815000 | -1.60985300 | 3.86520200  |
| H | -1.00520700 | -0.98326100 | 4.70460100  |
| H | -2.40228800 | -1.51752900 | 3.75170200  |
| H | -1.08731000 | -2.64644800 | 4.12925800  |

|   |            |             |             |
|---|------------|-------------|-------------|
| C | 2.10687500 | -0.89157700 | -0.97045000 |
| O | 1.90552200 | -2.05130900 | -0.57129000 |
| H | 1.75500900 | -0.57980100 | -1.97887200 |
| C | 3.33817800 | -0.12073000 | -0.55138600 |
| C | 3.72614400 | 1.01575100  | -1.26206400 |
| C | 4.11505400 | -0.56292600 | 0.51857900  |
| C | 4.86673700 | 1.72366800  | -0.89190100 |
| H | 3.13003000 | 1.34206500  | -2.11254500 |
| C | 5.25656600 | 0.14306400  | 0.89117100  |
| H | 3.81227900 | -1.46708300 | 1.03890700  |
| C | 5.63174600 | 1.28919800  | 0.18971300  |
| H | 5.16282300 | 2.60698500  | -1.44903100 |
| H | 5.85900000 | -0.20066700 | 1.72656700  |
| H | 6.52249100 | 1.83732600  | 0.47990200  |

Vibrational frequencies

|           |           |           |
|-----------|-----------|-----------|
| -140.8025 | 18.8189   | 29.6112   |
| 37.9049   | 40.6064   | 45.1343   |
| 56.8633   | 66.0009   | 73.7143   |
| 82.9269   | 85.4257   | 88.4107   |
| 113.5616  | 120.0583  | 141.1356  |
| 153.9354  | 202.7354  | 216.3982  |
| 219.1715  | 225.9574  | 238.1202  |
| 246.8102  | 259.6185  | 262.3463  |
| 272.7154  | 288.3537  | 298.7973  |
| 307.3938  | 317.7457  | 328.6381  |
| 334.9106  | 355.4167  | 366.2059  |
| 385.3512  | 407.1054  | 419.0011  |
| 420.6561  | 446.3588  | 468.9936  |
| 477.5996  | 493.7406  | 509.7470  |
| 531.0288  | 553.4794  | 568.1661  |
| 576.1289  | 613.6219  | 621.0036  |
| 626.4572  | 654.3860  | 657.6069  |
| 667.8814  | 713.5913  | 721.8466  |
| 730.3073  | 778.2049  | 782.8019  |
| 789.9572  | 816.4287  | 831.1306  |
| 832.0620  | 836.0807  | 852.3069  |
| 868.7910  | 886.7694  | 905.4062  |
| 915.8664  | 932.1413  | 933.7832  |
| 937.9920  | 942.2857  | 957.7665  |
| 967.3101  | 974.0112  | 979.2787  |
| 981.5857  | 984.1692  | 1009.9591 |
| 1011.1316 | 1013.4095 | 1017.7860 |
| 1028.9132 | 1061.9468 | 1065.3600 |

|           |           |           |
|-----------|-----------|-----------|
| 1076.9267 | 1086.0081 | 1099.4191 |
| 1105.6412 | 1117.0074 | 1121.6567 |
| 1125.3399 | 1145.0067 | 1146.5538 |
| 1158.5861 | 1169.9395 | 1175.2075 |
| 1182.6996 | 1187.2510 | 1191.6308 |
| 1213.2397 | 1228.0826 | 1239.3124 |
| 1250.9881 | 1253.4166 | 1284.6376 |
| 1294.3724 | 1299.8031 | 1304.0891 |
| 1323.5190 | 1331.5457 | 1332.3106 |
| 1338.7955 | 1349.4771 | 1358.8665 |
| 1374.8352 | 1378.6810 | 1383.6958 |
| 1392.2655 | 1400.5930 | 1404.1848 |
| 1404.6663 | 1406.2486 | 1414.3531 |
| 1415.4588 | 1425.4687 | 1426.0106 |
| 1448.0424 | 1478.7063 | 1484.5170 |
| 1485.1584 | 1486.2173 | 1490.4838 |
| 1495.3334 | 1497.7333 | 1499.3922 |
| 1500.2417 | 1501.2541 | 1503.7797 |
| 1506.9733 | 1518.0636 | 1519.9197 |
| 1527.8542 | 1534.6253 | 1547.3609 |
| 1646.9675 | 1679.6054 | 1689.3538 |
| 1691.2011 | 1693.8084 | 1693.9350 |
| 2923.0689 | 3050.0907 | 3052.8007 |
| 3055.0320 | 3060.5888 | 3061.9637 |
| 3062.6487 | 3063.5130 | 3067.3604 |
| 3069.8973 | 3081.8159 | 3107.3134 |
| 3108.3930 | 3115.7131 | 3117.5058 |
| 3127.5855 | 3134.5887 | 3138.7250 |
| 3138.8888 | 3144.1775 | 3149.5638 |
| 3150.0419 | 3150.3429 | 3153.1947 |
| 3156.5017 | 3190.2860 | 3201.2388 |
| 3205.4115 | 3214.7078 | 3217.4916 |
| 3222.2738 | 3227.7035 | 3234.1834 |

## M1

|                                              |              |              |
|----------------------------------------------|--------------|--------------|
| Zero-point correction=                       | 0.545233     |              |
| Thermal correction to Energy=                | 0.573694     |              |
| Thermal correction to Enthalpy=              | 0.574639     |              |
| Thermal correction to Gibbs Free Energy=     |              | 0.486590     |
| Sum of electronic and zero-point Energies=   |              | -1575.830611 |
| Sum of electronic and thermal Energies=      | -1575.802149 |              |
| Sum of electronic and thermal Enthalpies=    |              | -1575.801205 |
| Sum of electronic and thermal Free Energies= |              | -1575.889253 |

Cartesian coordinates

|   |             |             |             |
|---|-------------|-------------|-------------|
| C | 3.49593400  | 3.56586100  | -0.11819100 |
| C | 2.16484800  | 4.24595900  | 0.20823600  |
| C | 0.98356800  | 3.77833600  | -0.65173100 |
| C | 3.58918400  | 2.07856900  | 0.23045900  |
| C | 0.52117800  | 2.38646200  | -0.33062600 |
| C | 2.72392900  | 1.14424800  | -0.62893800 |
| C | 1.25481700  | 1.24745900  | -0.33136800 |
| H | 4.28990100  | 4.09166000  | 0.42239500  |
| H | 2.27927700  | 5.32365500  | 0.05443800  |
| H | 1.26550200  | 3.81852500  | -1.71184700 |
| H | 3.33645400  | 1.92872200  | 1.28737600  |
| H | 2.88667600  | 1.36710100  | -1.69227000 |
| C | -0.80559000 | 0.37111600  | 0.25884600  |
| H | 3.71173500  | 3.69670300  | -1.18743500 |
| H | 1.91962100  | 4.09901700  | 1.26683800  |
| H | 0.14470600  | 4.46822900  | -0.52614500 |
| H | 4.62925900  | 1.76116300  | 0.10612000  |
| H | 3.04859500  | 0.11410000  | -0.47222400 |
| N | 0.47188900  | 0.11898500  | -0.01400600 |
| C | 1.07641600  | -1.20649400 | -0.04116300 |
| C | 1.49794400  | -1.78135700 | 1.15700800  |
| C | 1.31628100  | -1.77277400 | -1.30085500 |
| C | 2.18586600  | -2.99533600 | 1.07324400  |
| C | 2.00434500  | -2.98521100 | -1.33092000 |
| C | 2.43947800  | -3.59102600 | -0.15522700 |
| H | 2.52156000  | -3.47916300 | 1.98606100  |
| H | 2.20430900  | -3.46296300 | -2.28426800 |
| H | 2.97808600  | -4.53216000 | -0.20022200 |
| C | 1.18438200  | -1.17883200 | 2.51277400  |
| C | 2.45497700  | -0.93499700 | 3.33246400  |
| H | 2.20403800  | -0.46437300 | 4.28738400  |
| H | 2.96935200  | -1.87629900 | 3.54968700  |
| H | 3.15312100  | -0.28325300 | 2.79879300  |
| C | 0.77123000  | -1.13784000 | -2.56899000 |
| S | -1.12637700 | 2.03684600  | 0.08143300  |
| H | 0.69944200  | -0.20856100 | 2.35994600  |
| H | 0.70663700  | -0.05485200 | -2.41230800 |
| C | 0.19671300  | -2.08716600 | 3.25861000  |
| H | 0.68623800  | -3.02577200 | 3.54180500  |
| H | -0.15319600 | -1.60206600 | 4.17501900  |
| H | -0.65323800 | -2.31976600 | 2.60964800  |
| C | -0.65513000 | -1.65597700 | -2.80783800 |
| H | -1.13849400 | -1.10116300 | -3.61781400 |

|   |             |             |             |
|---|-------------|-------------|-------------|
| H | -0.61861800 | -2.71414000 | -3.09212000 |
| H | -1.24528200 | -1.57896200 | -1.88852500 |
| C | 1.65941000  | -1.36267100 | -3.79277100 |
| H | 1.27388400  | -0.78549600 | -4.63768300 |
| H | 2.69090100  | -1.05027800 | -3.60386200 |
| H | 1.66894300  | -2.41431500 | -4.09517800 |
| C | -1.82170600 | -0.69384200 | 0.80318900  |
| O | -1.53891800 | -1.92028000 | 0.42009400  |
| H | -1.70939200 | -0.48916600 | 1.91006500  |
| C | -3.23966600 | -0.18812200 | 0.45424500  |
| C | -3.86916400 | 0.83513100  | 1.16685400  |
| C | -3.92311000 | -0.80430000 | -0.59295700 |
| C | -5.14878900 | 1.26216200  | 0.81264600  |
| H | -3.36263700 | 1.29282700  | 2.01530200  |
| C | -5.20132700 | -0.38283100 | -0.94918200 |
| H | -3.43345600 | -1.63194000 | -1.09652200 |
| C | -5.81530300 | 0.65690200  | -0.25112100 |
| H | -5.62965600 | 2.05758900  | 1.37389600  |
| H | -5.72496100 | -0.86920800 | -1.76696500 |
| H | -6.81343900 | 0.98384000  | -0.52520700 |

#### Vibrational frequencies

|          |          |          |
|----------|----------|----------|
| 22.4532  | 34.5255  | 41.6960  |
| 45.7416  | 54.3134  | 59.0850  |
| 74.5123  | 84.9104  | 89.8048  |
| 100.1741 | 115.5089 | 127.8115 |
| 131.6134 | 151.0281 | 172.4285 |
| 200.2148 | 214.0747 | 224.1640 |
| 238.0098 | 245.1587 | 247.7578 |
| 256.7972 | 266.8479 | 281.1756 |
| 290.0297 | 299.3309 | 312.2424 |
| 323.8496 | 332.1922 | 339.5367 |
| 352.3777 | 358.6558 | 377.8372 |
| 408.2607 | 414.9847 | 423.5976 |
| 442.2846 | 447.8565 | 473.5490 |
| 491.2897 | 516.5385 | 530.2404 |
| 538.5653 | 567.2838 | 572.9937 |
| 605.8014 | 618.3527 | 628.4028 |
| 630.9725 | 654.6545 | 671.5698 |
| 714.5981 | 727.1696 | 729.3450 |
| 747.7093 | 779.7950 | 789.7577 |
| 809.6548 | 827.2392 | 831.1365 |
| 835.7256 | 839.3911 | 876.7906 |
| 890.5026 | 897.4978 | 913.6221 |

|           |           |           |
|-----------|-----------|-----------|
| 918.3469  | 938.4362  | 940.5511  |
| 946.1104  | 951.5271  | 956.5823  |
| 965.3285  | 975.9985  | 976.0957  |
| 987.9407  | 1006.6547 | 1009.4196 |
| 1010.1640 | 1015.8642 | 1026.4731 |
| 1052.7791 | 1063.8980 | 1074.3724 |
| 1088.1971 | 1093.1829 | 1103.9214 |
| 1107.4464 | 1125.0542 | 1132.8130 |
| 1145.2153 | 1149.7901 | 1165.2266 |
| 1170.4147 | 1176.2709 | 1182.3545 |
| 1184.9059 | 1192.1137 | 1203.8061 |
| 1214.4706 | 1241.1550 | 1248.7931 |
| 1253.8513 | 1261.2737 | 1294.2923 |
| 1295.9403 | 1300.7017 | 1304.2463 |
| 1309.6159 | 1324.5177 | 1329.4256 |
| 1334.7499 | 1342.4851 | 1348.8350 |
| 1355.8872 | 1375.0594 | 1377.1722 |
| 1384.2690 | 1384.7118 | 1397.6720 |
| 1400.3043 | 1400.6096 | 1408.3088 |
| 1408.8342 | 1420.9894 | 1422.6334 |
| 1427.2549 | 1481.3985 | 1484.6443 |
| 1485.7385 | 1488.6214 | 1490.1896 |
| 1493.1451 | 1495.6679 | 1497.4899 |
| 1499.8970 | 1500.4544 | 1502.0357 |
| 1508.1533 | 1510.9678 | 1519.6202 |
| 1524.1370 | 1528.9902 | 1537.3492 |
| 1541.2552 | 1675.6994 | 1677.6032 |
| 1685.2045 | 1692.5319 | 1693.2594 |
| 2703.6002 | 3046.3367 | 3051.4629 |
| 3052.3934 | 3057.6980 | 3058.8198 |
| 3063.8384 | 3064.5275 | 3067.1254 |
| 3071.2769 | 3082.9310 | 3097.4861 |
| 3113.6805 | 3114.5818 | 3122.0097 |
| 3125.0538 | 3129.1099 | 3131.6183 |
| 3141.3101 | 3143.2111 | 3145.1498 |
| 3146.1551 | 3148.3822 | 3150.2621 |
| 3155.1594 | 3178.7279 | 3201.7654 |
| 3204.5135 | 3215.5076 | 3219.2052 |
| 3226.4483 | 3229.5548 | 3238.2595 |

## TS2

|                                 |          |
|---------------------------------|----------|
| Zero-point correction=          | 0.566851 |
| Thermal correction to Energy=   | 0.599365 |
| Thermal correction to Enthalpy= | 0.600310 |



|                                              |              |
|----------------------------------------------|--------------|
| Thermal correction to Gibbs Free Energy=     | 0.502479     |
| Sum of electronic and zero-point Energies=   | -1840.260360 |
| Sum of electronic and thermal Energies=      | -1840.227845 |
| Sum of electronic and thermal Enthalpies=    | -1840.226901 |
| Sum of electronic and thermal Free Energies= | -1840.324732 |

Cartesian coordinates

|   |           |           |           |
|---|-----------|-----------|-----------|
| C | 4.646201  | -2.044513 | -1.747934 |
| C | 3.527581  | -2.823917 | -2.436230 |
| C | 2.377477  | -3.229531 | -1.512119 |
| C | 4.289580  | -0.605805 | -1.372338 |
| C | 1.542678  | -2.093292 | -0.992347 |
| C | 3.320174  | -0.430033 | -0.199631 |
| C | 1.917355  | -0.926354 | -0.428665 |
| H | 5.510290  | -2.014928 | -2.419660 |
| H | 3.945566  | -3.743835 | -2.859123 |
| H | 2.781506  | -3.785734 | -0.656310 |
| H | 3.887230  | -0.091787 | -2.253868 |
| H | 3.728761  | -0.931238 | 0.689811  |
| C | -0.399427 | -0.732792 | -0.169870 |
| H | 4.970402  | -2.588248 | -0.850364 |
| H | 3.130810  | -2.238628 | -3.274537 |
| H | 1.720513  | -3.924054 | -2.046392 |
| H | 5.209172  | -0.079689 | -1.099022 |
| H | 3.276049  | 0.633504  | 0.046392  |
| N | 0.808419  | -0.171657 | 0.040385  |
| C | 1.057685  | 1.014041  | 0.845743  |
| C | 1.021514  | 2.275175  | 0.238451  |
| C | 1.448404  | 0.811978  | 2.174557  |
| C | 1.414383  | 3.365639  | 1.013727  |
| C | 1.826965  | 1.935978  | 2.913177  |
| C | 1.818892  | 3.199480  | 2.335523  |
| H | 1.395446  | 4.361398  | 0.583853  |
| H | 2.132292  | 1.821071  | 3.947809  |
| H | 2.123540  | 4.062692  | 2.919692  |
| C | 0.557271  | 2.437936  | -1.197107 |
| C | 1.664079  | 2.059434  | -2.191789 |
| H | 1.326083  | 2.243434  | -3.216139 |
| H | 2.563264  | 2.659842  | -2.015798 |
| H | 1.937361  | 1.003660  | -2.118075 |
| C | 1.375526  | -0.566136 | 2.813233  |
| S | -0.196214 | -2.263760 | -0.952704 |
| H | -0.285761 | 1.755135  | -1.343567 |
| H | 1.558478  | -1.316578 | 2.036865  |

|   |           |           |           |
|---|-----------|-----------|-----------|
| C | 0.040734  | 3.845590  | -1.501824 |
| H | 0.856288  | 4.575474  | -1.551375 |
| H | -0.467837 | 3.838583  | -2.470803 |
| H | -0.689392 | 4.162936  | -0.754473 |
| C | -0.046603 | -0.790754 | 3.348644  |
| H | -0.168232 | -1.816834 | 3.709654  |
| H | -0.238680 | -0.107173 | 4.183688  |
| H | -0.790903 | -0.580544 | 2.573699  |
| C | 2.417407  | -0.784939 | 3.911036  |
| H | 2.393099  | -1.828728 | 4.237630  |
| H | 3.427090  | -0.557360 | 3.558089  |
| H | 2.212973  | -0.164357 | 4.789635  |
| C | -1.692994 | -0.110341 | 0.070524  |
| O | -1.688453 | 0.951909  | 0.926186  |
| H | -1.941883 | 0.374640  | -1.070924 |
| C | -2.826547 | -1.099713 | 0.274299  |
| C | -3.310371 | -1.901635 | -0.766748 |
| C | -3.464443 | -1.157380 | 1.516479  |
| C | -4.366781 | -2.784978 | -0.553354 |
| H | -2.877747 | -1.809610 | -1.760721 |
| C | -4.521611 | -2.038491 | 1.731259  |
| H | -3.123133 | -0.484506 | 2.295296  |
| C | -4.970842 | -2.863149 | 0.700388  |
| H | -4.728384 | -3.399292 | -1.372162 |
| H | -5.001753 | -2.079452 | 2.704469  |
| H | -5.796080 | -3.547609 | 0.866568  |
| C | -2.833051 | 2.333241  | -1.749611 |
| O | -2.404660 | 1.164559  | -2.133487 |
| O | -2.740503 | 2.644239  | -0.458471 |
| H | -2.248035 | 1.877932  | 0.189905  |
| O | -3.320797 | 3.160945  | -2.539732 |

#### Vibrational frequencies

|            |          |          |
|------------|----------|----------|
| -1081.8670 | 17.2341  | 31.3394  |
| 38.0645    | 41.7905  | 44.7797  |
| 48.6675    | 54.6800  | 65.8531  |
| 76.2570    | 80.3542  | 90.8592  |
| 99.4181    | 112.9496 | 120.0832 |
| 131.1830   | 137.9149 | 147.5984 |
| 154.7782   | 183.9519 | 192.8334 |
| 213.2534   | 222.1709 | 228.4864 |
| 232.8099   | 249.0350 | 257.1655 |
| 263.7874   | 271.1006 | 283.7029 |
| 304.8183   | 309.1080 | 320.1781 |

|           |           |           |
|-----------|-----------|-----------|
| 331.1162  | 334.0478  | 342.0975  |
| 354.0003  | 360.6581  | 386.6652  |
| 407.1982  | 413.1238  | 422.1399  |
| 442.5975  | 447.6859  | 465.7322  |
| 484.9905  | 495.6873  | 532.9678  |
| 544.2879  | 554.9625  | 564.2577  |
| 578.9482  | 596.3152  | 601.4601  |
| 627.1075  | 631.7149  | 636.6794  |
| 648.6744  | 664.5242  | 709.5233  |
| 719.7710  | 723.5609  | 725.5069  |
| 760.0735  | 780.4548  | 793.5693  |
| 818.6410  | 823.0057  | 825.4566  |
| 831.2976  | 836.8940  | 854.8463  |
| 879.1121  | 893.6128  | 911.2240  |
| 916.7817  | 927.4196  | 934.6010  |
| 939.1241  | 943.5514  | 945.7828  |
| 963.0990  | 966.6072  | 978.8808  |
| 979.8452  | 982.8943  | 1001.3783 |
| 1006.6861 | 1011.5138 | 1015.1731 |
| 1017.3149 | 1030.2758 | 1060.8778 |
| 1075.6490 | 1077.2825 | 1085.8198 |
| 1088.8596 | 1099.9323 | 1104.4444 |
| 1121.0961 | 1130.2635 | 1148.1189 |
| 1150.0538 | 1161.8157 | 1168.5626 |
| 1173.8829 | 1175.9341 | 1179.7455 |
| 1182.9068 | 1190.0101 | 1200.3331 |
| 1213.7694 | 1231.2024 | 1246.7012 |
| 1254.3696 | 1277.6608 | 1289.0244 |
| 1291.7404 | 1303.1986 | 1306.2915 |
| 1317.2041 | 1322.5149 | 1326.6188 |
| 1338.2380 | 1341.3003 | 1349.8094 |
| 1359.5862 | 1371.8556 | 1384.5708 |
| 1387.2687 | 1390.5488 | 1395.0922 |
| 1401.9987 | 1405.6200 | 1406.8575 |
| 1410.2605 | 1419.4667 | 1421.5837 |
| 1425.6073 | 1461.0676 | 1471.6603 |
| 1481.3770 | 1481.8267 | 1484.1614 |
| 1488.7930 | 1490.6309 | 1492.4661 |
| 1494.7387 | 1497.1735 | 1498.0588 |
| 1503.0362 | 1509.5547 | 1513.1405 |
| 1518.1699 | 1520.3150 | 1526.6842 |
| 1533.5474 | 1538.4669 | 1631.3269 |
| 1668.4437 | 1674.9756 | 1688.8325 |
| 1689.4152 | 1716.1674 | 1720.6390 |

|           |           |           |
|-----------|-----------|-----------|
| 1793.9764 | 3043.7876 | 3050.0561 |
| 3055.3816 | 3056.2774 | 3058.7775 |
| 3060.3578 | 3063.6595 | 3063.7592 |
| 3066.8959 | 3097.8363 | 3108.0019 |
| 3110.9568 | 3115.8175 | 3117.8531 |
| 3124.3474 | 3129.5521 | 3133.3834 |
| 3138.7204 | 3142.3994 | 3144.2498 |
| 3149.5219 | 3154.4011 | 3161.9604 |
| 3165.5234 | 3192.9574 | 3197.8106 |
| 3208.1731 | 3209.5800 | 3216.5807 |
| 3221.0348 | 3230.6200 | 3231.0004 |

## M2

|                                              |          |              |
|----------------------------------------------|----------|--------------|
| Zero-point correction=                       | 0.573678 |              |
| Thermal correction to Energy=                | 0.606927 |              |
| Thermal correction to Enthalpy=              | 0.607872 |              |
| Thermal correction to Gibbs Free Energy=     |          | 0.509539     |
| Sum of electronic and zero-point Energies=   |          | -1840.295825 |
| Sum of electronic and thermal Energies=      |          | -1840.262575 |
| Sum of electronic and thermal Enthalpies=    |          | -1840.261631 |
| Sum of electronic and thermal Free Energies= |          | -1840.359964 |

## Cartesian coordinates

|   |           |           |           |
|---|-----------|-----------|-----------|
| C | 5.352143  | 0.811284  | -0.096452 |
| C | 4.727530  | 2.165390  | 0.246298  |
| C | 3.669210  | 2.649457  | -0.753073 |
| C | 4.422570  | -0.400352 | 0.005706  |
| C | 2.380593  | 1.880916  | -0.684148 |
| C | 3.291880  | -0.450219 | -1.029032 |
| C | 2.199183  | 0.556389  | -0.794768 |
| H | 6.204119  | 0.645058  | 0.572219  |
| H | 5.527710  | 2.913043  | 0.286775  |
| H | 4.081836  | 2.596947  | -1.770303 |
| H | 3.983110  | -0.445067 | 1.010346  |
| H | 3.711763  | -0.297764 | -2.033199 |
| C | -0.051503 | 1.195544  | -0.534615 |
| H | 5.763727  | 0.858183  | -1.114676 |
| H | 4.278032  | 2.123422  | 1.247093  |
| H | 3.459215  | 3.707558  | -0.566989 |
| H | 5.027080  | -1.306146 | -0.114457 |
| H | 2.852164  | -1.449990 | -1.021180 |
| N | 0.859343  | 0.126281  | -0.678376 |
| C | 0.588393  | -1.136630 | -0.026869 |
| C | 0.725094  | -1.231499 | 1.370122  |

|   |           |           |           |
|---|-----------|-----------|-----------|
| C | 0.234781  | -2.248615 | -0.809086 |
| C | 0.520301  | -2.476890 | 1.970072  |
| C | 0.054895  | -3.475535 | -0.167144 |
| C | 0.195997  | -3.593498 | 1.209974  |
| H | 0.621781  | -2.574597 | 3.047501  |
| H | -0.209762 | -4.349580 | -0.755979 |
| H | 0.044698  | -4.554774 | 1.691763  |
| C | 1.033866  | -0.022324 | 2.239039  |
| C | 2.045930  | -0.325345 | 3.349635  |
| H | 2.341732  | 0.604285  | 3.845146  |
| H | 1.619553  | -0.980336 | 4.115987  |
| H | 2.946922  | -0.807368 | 2.959377  |
| C | 0.039635  | -2.155310 | -2.311645 |
| S | 0.856466  | 2.723939  | -0.352338 |
| H | 1.472570  | 0.753948  | 1.604374  |
| H | 0.021738  | -1.093485 | -2.565480 |
| C | -0.259530 | 0.537515  | 2.848935  |
| H | -0.700450 | -0.197237 | 3.532084  |
| H | -0.047475 | 1.449197  | 3.417834  |
| H | -0.996791 | 0.761065  | 2.074242  |
| C | -1.300834 | -2.769721 | -2.731527 |
| H | -1.517398 | -2.515953 | -3.774483 |
| H | -1.269509 | -3.863349 | -2.663620 |
| H | -2.113070 | -2.413095 | -2.094895 |
| C | 1.186392  | -2.830139 | -3.075516 |
| H | 0.997731  | -2.791192 | -4.153315 |
| H | 2.148725  | -2.347623 | -2.885148 |
| H | 1.272646  | -3.884178 | -2.788449 |
| C | -1.397556 | 1.058631  | -0.646756 |
| O | -1.903810 | -0.131922 | -1.082109 |
| H | -2.208462 | -0.682048 | -0.262096 |
| C | -2.370647 | 2.136860  | -0.404688 |
| C | -2.133999 | 3.223506  | 0.453210  |
| C | -3.620114 | 2.065736  | -1.046201 |
| C | -3.090163 | 4.222024  | 0.623873  |
| H | -1.215753 | 3.270577  | 1.030434  |
| C | -4.571673 | 3.062727  | -0.873808 |
| H | -3.822558 | 1.211476  | -1.682650 |
| C | -4.310332 | 4.153695  | -0.043308 |
| H | -2.883898 | 5.048580  | 1.297268  |
| H | -5.525184 | 2.989267  | -1.388563 |
| H | -5.054812 | 4.931525  | 0.092142  |
| C | -3.026967 | -2.536566 | 0.815793  |
| O | -2.859161 | -3.413735 | 1.872056  |

|   |           |           |           |
|---|-----------|-----------|-----------|
| O | -2.503472 | -1.396260 | 0.996069  |
| O | -3.671330 | -2.959157 | -0.147782 |
| H | -2.238873 | -2.970926 | 2.466936  |

Vibrational frequencies

|           |           |           |
|-----------|-----------|-----------|
| 27.8398   | 32.4459   | 40.7321   |
| 43.9493   | 48.3363   | 57.8559   |
| 65.7227   | 74.7546   | 81.8836   |
| 93.4888   | 97.0719   | 98.3246   |
| 102.9486  | 111.2100  | 122.6137  |
| 134.2604  | 137.1614  | 147.9674  |
| 154.2251  | 172.7328  | 193.1666  |
| 203.4070  | 218.8711  | 222.7995  |
| 242.2681  | 247.6433  | 256.7274  |
| 267.2811  | 271.3343  | 278.9531  |
| 293.8664  | 308.2233  | 318.6575  |
| 323.0632  | 327.0443  | 344.0385  |
| 358.0549  | 372.5401  | 389.0175  |
| 405.5391  | 415.2288  | 422.9489  |
| 452.5666  | 459.5545  | 463.8633  |
| 491.5730  | 506.0680  | 517.3630  |
| 535.8987  | 538.3859  | 559.3768  |
| 570.0627  | 595.1493  | 610.4848  |
| 615.5798  | 630.0937  | 637.9876  |
| 648.2484  | 656.1047  | 662.3472  |
| 687.4282  | 706.4534  | 720.2058  |
| 721.4626  | 770.7781  | 787.4532  |
| 793.3960  | 813.6708  | 825.9849  |
| 829.2058  | 830.6893  | 833.3433  |
| 873.3638  | 885.3098  | 894.5520  |
| 914.1253  | 925.9900  | 930.2705  |
| 932.4859  | 938.2999  | 940.4157  |
| 948.6442  | 964.6247  | 965.4045  |
| 975.7382  | 981.5683  | 982.9804  |
| 993.6594  | 999.5959  | 1000.7151 |
| 1012.4368 | 1019.8257 | 1020.6979 |
| 1067.5645 | 1072.1180 | 1077.3664 |
| 1087.0756 | 1094.6588 | 1105.8734 |
| 1120.6342 | 1121.5817 | 1140.4970 |
| 1141.4589 | 1146.5058 | 1162.5577 |
| 1174.4868 | 1178.7458 | 1182.4089 |
| 1190.2105 | 1207.6204 | 1208.9057 |
| 1217.8271 | 1234.6278 | 1248.7772 |
| 1263.1064 | 1274.8414 | 1290.3009 |

|           |           |           |
|-----------|-----------|-----------|
| 1292.1100 | 1299.9680 | 1308.8320 |
| 1310.2116 | 1331.3072 | 1333.8935 |
| 1338.8100 | 1342.0351 | 1361.0160 |
| 1365.7383 | 1372.6422 | 1379.9849 |
| 1382.8064 | 1392.5380 | 1397.3775 |
| 1400.5996 | 1403.9456 | 1405.4954 |
| 1406.7603 | 1415.5458 | 1420.6762 |
| 1425.2858 | 1478.3479 | 1480.6111 |
| 1482.3240 | 1483.2826 | 1486.6415 |
| 1491.8749 | 1493.9767 | 1495.7067 |
| 1496.8178 | 1501.4904 | 1502.2065 |
| 1506.8740 | 1512.8057 | 1513.8853 |
| 1519.2816 | 1531.3210 | 1541.8341 |
| 1555.2724 | 1655.4713 | 1672.8563 |
| 1676.7957 | 1680.6454 | 1702.4243 |
| 1750.9971 | 1791.6512 | 2577.6480 |
| 3043.3706 | 3046.5754 | 3051.9472 |
| 3053.9472 | 3054.2359 | 3056.6311 |
| 3058.3288 | 3058.7162 | 3060.1941 |
| 3098.1828 | 3103.1612 | 3107.6281 |
| 3110.4423 | 3111.7064 | 3120.8497 |
| 3125.8224 | 3131.8121 | 3138.2738 |
| 3139.4126 | 3142.4893 | 3145.8476 |
| 3153.9616 | 3164.6421 | 3174.5030 |
| 3198.6853 | 3202.7072 | 3202.9607 |
| 3214.0982 | 3217.3147 | 3228.2727 |
| 3230.8840 | 3235.8667 | 3853.8099 |

### M3

|                                              |          |              |
|----------------------------------------------|----------|--------------|
| Zero-point correction=                       | 1.023554 |              |
| Thermal correction to Energy=                | 1.083458 |              |
| Thermal correction to Enthalpy=              | 1.084403 |              |
| Thermal correction to Gibbs Free Energy=     |          | 0.928533     |
| Sum of electronic and zero-point Energies=   |          | -3087.774884 |
| Sum of electronic and thermal Energies=      |          | -3087.714979 |
| Sum of electronic and thermal Enthalpies=    |          | -3087.714035 |
| Sum of electronic and thermal Free Energies= |          | -3087.869905 |

### Cartesian coordinates

|   |           |           |           |
|---|-----------|-----------|-----------|
| C | -0.645417 | -5.185280 | -1.810778 |
| C | -1.352169 | -4.097396 | -2.622497 |
| C | -1.840155 | -2.908245 | -1.785711 |
| C | 0.706413  | -4.800341 | -1.203581 |
| C | -0.734487 | -2.018073 | -1.299750 |

|   |           |           |           |
|---|-----------|-----------|-----------|
| C | 0.648299  | -3.745616 | -0.090889 |
| C | 0.351897  | -2.356807 | -0.586664 |
| H | -0.492619 | -6.054454 | -2.460027 |
| H | -2.221448 | -4.545545 | -3.117192 |
| H | -2.422609 | -3.291281 | -0.934742 |
| H | 1.377740  | -4.445324 | -1.994394 |
| H | -0.121868 | -4.030424 | 0.638957  |
| C | 0.835049  | -0.068088 | -0.892592 |
| H | -1.315761 | -5.517253 | -1.004645 |
| H | -0.686364 | -3.728497 | -3.413178 |
| H | -2.536779 | -2.309588 | -2.383779 |
| H | 1.161554  | -5.704096 | -0.784424 |
| H | 1.599459  | -3.735484 | 0.445771  |
| N | 1.251796  | -1.301826 | -0.349390 |
| C | 2.661498  | -1.621659 | -0.245344 |
| C | 3.370036  | -1.993633 | -1.399437 |
| C | 3.263313  | -1.599296 | 1.022008  |
| C | 4.704172  | -2.387365 | -1.247309 |
| C | 4.592322  | -2.007331 | 1.126878  |
| C | 5.308524  | -2.404515 | 0.001968  |
| H | 5.276080  | -2.684970 | -2.121261 |
| H | 5.076715  | -2.007065 | 2.099322  |
| H | 6.343328  | -2.719071 | 0.100871  |
| C | 2.757663  | -1.924502 | -2.790317 |
| C | 3.202168  | -3.076539 | -3.700085 |
| H | 2.587544  | -3.092256 | -4.604887 |
| H | 4.242593  | -2.953161 | -4.017066 |
| H | 3.116125  | -4.049254 | -3.208097 |
| C | 2.504041  | -1.126761 | 2.247942  |
| S | -0.697823 | -0.310314 | -1.746936 |
| H | 1.667020  | -1.982416 | -2.690636 |
| H | 1.628468  | -0.587239 | 1.877550  |
| C | 3.106823  | -0.585896 | -3.458039 |
| H | 4.191347  | -0.507060 | -3.587886 |
| H | 2.636650  | -0.521326 | -4.444944 |
| H | 2.780374  | 0.260934  | -2.850739 |
| C | 3.339031  | -0.144886 | 3.075848  |
| H | 2.713173  | 0.315616  | 3.849556  |
| H | 4.162400  | -0.652354 | 3.590619  |
| H | 3.758662  | 0.636919  | 2.434888  |
| C | 2.023269  | -2.301964 | 3.106311  |
| H | 1.559624  | -1.935037 | 4.027422  |
| H | 1.277718  | -2.908736 | 2.580366  |
| H | 2.862733  | -2.949757 | 3.383165  |



|   |           |           |           |
|---|-----------|-----------|-----------|
| C | 1.506995  | 1.104521  | -0.701234 |
| O | 2.522816  | 1.080496  | 0.203874  |
| H | 3.450460  | 1.051110  | -0.255733 |
| C | 1.270774  | 2.392003  | -1.378395 |
| C | 0.183179  | 2.700213  | -2.218020 |
| C | 2.214367  | 3.413870  | -1.146173 |
| C | 0.041948  | 3.970411  | -2.774803 |
| H | -0.582157 | 1.969114  | -2.447467 |
| C | 2.071926  | 4.673591  | -1.709616 |
| H | 3.058518  | 3.196005  | -0.502459 |
| C | 0.980329  | 4.967276  | -2.526906 |
| H | -0.814355 | 4.175157  | -3.410889 |
| H | 2.816901  | 5.436719  | -1.502573 |
| H | 0.864210  | 5.954128  | -2.963342 |
| C | 5.633558  | 1.112856  | 0.064196  |
| O | 6.823964  | 0.442751  | -0.136260 |
| O | 4.776680  | 0.947444  | -0.857757 |
| O | 5.552287  | 1.791431  | 1.091588  |
| H | 6.671266  | -0.109887 | -0.914672 |
| N | -2.944133 | 0.362071  | 1.110110  |
| C | -2.914471 | 1.454895  | 0.283578  |
| C | -1.869454 | 2.353168  | 0.352049  |
| H | -1.887760 | 3.190630  | -0.334570 |
| C | -0.817425 | 2.185599  | 1.267299  |
| C | -0.793798 | 0.964099  | 1.953737  |
| H | 0.033465  | 0.705068  | 2.603265  |
| C | -1.835955 | 0.063211  | 1.871201  |
| C | 0.182055  | 3.237538  | 1.509258  |
| C | -0.099300 | 4.569260  | 1.169543  |
| H | -1.056917 | 4.833841  | 0.732907  |
| C | 0.828510  | 5.570785  | 1.422072  |
| H | 0.595222  | 6.597753  | 1.161266  |
| C | 2.053651  | 5.257079  | 2.009209  |
| H | 2.780571  | 6.040105  | 2.200209  |
| C | 2.344951  | 3.936766  | 2.344140  |
| H | 3.305151  | 3.680865  | 2.780483  |
| C | 1.415535  | 2.933009  | 2.101172  |
| H | 1.683682  | 1.905533  | 2.314874  |
| C | -4.002526 | 1.669964  | -0.706417 |
| C | -4.141805 | 0.781167  | -1.777875 |
| H | -3.489732 | -0.083215 | -1.842945 |
| C | -5.111773 | 1.008131  | -2.748328 |
| H | -5.209994 | 0.319039  | -3.580776 |
| C | -5.944135 | 2.121355  | -2.655569 |

|   |           |           |           |
|---|-----------|-----------|-----------|
| H | -6.704433 | 2.293413  | -3.409928 |
| C | -5.791307 | 3.021328  | -1.603016 |
| H | -6.429349 | 3.895776  | -1.536767 |
| C | -4.813212 | 2.806543  | -0.636088 |
| H | -4.683143 | 3.512255  | 0.179387  |
| C | -1.764234 | -1.209550 | 2.624840  |
| C | -2.053336 | -2.422370 | 1.986522  |
| H | -2.372082 | -2.414438 | 0.948659  |
| C | -1.931932 | -3.619419 | 2.683655  |
| H | -2.156150 | -4.556231 | 2.183198  |
| C | -1.523362 | -3.614412 | 4.017033  |
| H | -1.431794 | -4.549904 | 4.558700  |
| C | -1.239275 | -2.408953 | 4.654531  |
| H | -0.928966 | -2.401149 | 5.693906  |
| C | -1.354146 | -1.207573 | 3.961699  |
| H | -1.146376 | -0.266682 | 4.462334  |
| C | -4.265397 | -0.193067 | 1.547359  |
| H | -4.026401 | -1.023501 | 2.211698  |
| C | -5.036386 | 0.858365  | 2.333865  |
| H | -5.399316 | 1.656563  | 1.685618  |
| H | -4.393788 | 1.277475  | 3.110833  |
| C | -5.119388 | -0.816576 | 0.447499  |
| O | -6.285069 | -0.554375 | 0.294155  |
| O | -4.463392 | -1.762950 | -0.227269 |
| C | -5.262718 | -2.461429 | -1.197137 |
| H | -4.615650 | -3.220264 | -1.629707 |
| H | -6.122481 | -2.919599 | -0.707226 |
| H | -5.608198 | -1.762607 | -1.962088 |
| H | -5.897412 | 0.383250  | 2.805455  |

#### Vibrational frequencies

|          |          |          |
|----------|----------|----------|
| 16.2558  | 26.5002  | 27.5415  |
| 31.5443  | 34.0167  | 37.7419  |
| 40.1038  | 44.9065  | 48.6848  |
| 49.3504  | 52.2975  | 55.6209  |
| 59.4462  | 63.3236  | 66.0054  |
| 71.1187  | 75.4282  | 79.9723  |
| 82.7692  | 87.7969  | 91.9262  |
| 94.1577  | 96.6446  | 97.5127  |
| 104.0324 | 107.4668 | 110.1095 |
| 111.9812 | 113.5620 | 122.1842 |
| 124.3376 | 130.8785 | 133.7438 |
| 144.8977 | 145.7053 | 156.9819 |
| 158.0390 | 170.5773 | 180.8624 |

|           |           |           |
|-----------|-----------|-----------|
| 186.8100  | 189.1431  | 195.9627  |
| 211.2241  | 227.3307  | 234.0512  |
| 236.5121  | 238.1875  | 239.7750  |
| 243.2925  | 247.7059  | 257.5412  |
| 262.3080  | 265.5753  | 270.2731  |
| 272.9991  | 278.2224  | 280.2379  |
| 288.8307  | 297.3250  | 302.6338  |
| 305.9362  | 316.4048  | 320.2407  |
| 328.6131  | 331.8163  | 348.4802  |
| 363.3293  | 367.2478  | 376.8840  |
| 387.2960  | 393.0063  | 410.8616  |
| 413.2417  | 413.9409  | 416.6191  |
| 418.1939  | 420.3245  | 423.2598  |
| 426.5434  | 449.9497  | 452.9466  |
| 457.6078  | 473.0480  | 480.4037  |
| 502.8963  | 514.0065  | 516.4156  |
| 523.2395  | 530.2817  | 533.5398  |
| 561.8547  | 568.1729  | 576.6739  |
| 592.8535  | 599.6972  | 607.0530  |
| 612.1960  | 612.5634  | 622.6672  |
| 625.7303  | 627.3180  | 629.2092  |
| 634.2334  | 635.7109  | 640.6544  |
| 645.4280  | 649.4697  | 654.6865  |
| 663.7638  | 667.1087  | 682.5614  |
| 684.0588  | 702.5189  | 703.9350  |
| 704.5809  | 712.0236  | 720.4226  |
| 725.9219  | 752.7185  | 773.5354  |
| 776.6218  | 777.9762  | 783.2510  |
| 791.5371  | 791.7413  | 794.7600  |
| 811.4097  | 816.1742  | 825.9798  |
| 829.5250  | 831.0406  | 832.6739  |
| 847.6780  | 853.2886  | 860.5614  |
| 865.5287  | 871.3105  | 884.4105  |
| 887.6314  | 895.2762  | 903.8297  |
| 909.1734  | 914.4789  | 917.3577  |
| 925.7785  | 929.6997  | 932.0981  |
| 935.4343  | 935.8179  | 952.0405  |
| 955.8312  | 965.9858  | 967.3961  |
| 973.7354  | 974.4617  | 979.4144  |
| 982.6489  | 983.8170  | 991.7893  |
| 993.9354  | 999.0057  | 1003.2471 |
| 1005.6527 | 1006.0535 | 1009.2737 |
| 1013.1329 | 1014.9298 | 1015.7990 |
| 1017.6928 | 1018.7785 | 1024.8929 |

|           |           |           |
|-----------|-----------|-----------|
| 1027.5516 | 1033.7564 | 1038.2919 |
| 1048.1010 | 1054.4000 | 1068.5624 |
| 1068.8716 | 1071.0776 | 1075.7586 |
| 1078.7074 | 1083.3010 | 1086.2582 |
| 1092.8151 | 1094.4021 | 1111.5706 |
| 1115.6349 | 1119.7705 | 1122.6217 |
| 1123.9590 | 1132.3630 | 1135.2050 |
| 1138.2755 | 1147.5988 | 1149.3982 |
| 1154.4465 | 1165.6862 | 1176.3836 |
| 1180.3576 | 1180.7403 | 1182.2328 |
| 1182.2748 | 1187.4565 | 1187.9611 |
| 1188.5878 | 1192.0859 | 1194.5497 |
| 1208.9716 | 1210.2270 | 1211.6554 |
| 1218.5765 | 1220.7816 | 1226.3446 |
| 1227.1466 | 1231.2367 | 1253.7449 |
| 1264.8929 | 1279.6569 | 1280.3554 |
| 1280.9527 | 1288.4211 | 1292.1541 |
| 1292.9315 | 1299.9181 | 1308.9192 |
| 1310.6987 | 1315.1706 | 1327.6708 |
| 1332.8694 | 1335.7814 | 1337.4377 |
| 1338.9043 | 1342.6684 | 1348.6330 |
| 1360.2643 | 1363.0423 | 1365.6585 |
| 1370.3212 | 1372.1612 | 1373.4274 |
| 1376.3710 | 1380.5003 | 1383.1257 |
| 1393.9371 | 1397.9365 | 1400.9797 |
| 1401.7758 | 1402.9973 | 1404.1914 |
| 1406.0890 | 1414.7491 | 1421.4314 |
| 1423.0263 | 1424.7310 | 1425.5979 |
| 1467.8739 | 1471.4020 | 1472.6019 |
| 1478.0362 | 1481.6156 | 1484.1567 |
| 1487.5724 | 1488.1029 | 1488.5027 |
| 1489.1737 | 1490.8221 | 1491.9932 |
| 1496.3944 | 1496.8508 | 1498.5137 |
| 1499.3356 | 1500.5434 | 1500.6894 |
| 1504.0901 | 1504.4459 | 1507.8573 |
| 1513.6072 | 1514.5092 | 1520.9905 |
| 1521.7491 | 1528.7451 | 1531.5492 |
| 1549.4362 | 1551.7578 | 1554.7781 |
| 1561.3174 | 1619.2066 | 1636.0514 |
| 1663.2589 | 1666.4244 | 1670.6528 |
| 1672.3518 | 1674.7862 | 1678.9761 |
| 1685.9695 | 1691.3861 | 1692.4412 |
| 1693.4902 | 1699.9611 | 1741.5984 |
| 1780.5442 | 1875.4816 | 2515.7845 |

|           |           |           |
|-----------|-----------|-----------|
| 3038.8808 | 3040.9054 | 3047.1669 |
| 3050.5499 | 3053.7027 | 3059.6185 |
| 3062.9492 | 3064.8431 | 3069.0369 |
| 3094.5961 | 3098.4281 | 3098.7582 |
| 3099.2412 | 3101.5234 | 3105.4112 |
| 3113.2672 | 3117.8312 | 3124.6567 |
| 3134.0479 | 3135.3418 | 3139.1198 |
| 3139.7158 | 3140.8759 | 3152.7793 |
| 3154.6060 | 3162.1250 | 3171.0824 |
| 3184.1581 | 3187.3357 | 3188.6144 |
| 3196.4860 | 3199.8142 | 3203.8702 |
| 3204.2951 | 3207.1576 | 3209.1737 |
| 3209.8885 | 3213.4373 | 3213.5406 |
| 3214.5601 | 3223.8749 | 3224.7675 |
| 3225.0552 | 3228.0557 | 3230.8334 |
| 3231.2703 | 3234.8641 | 3239.9580 |
| 3241.3568 | 3241.6237 | 3243.4520 |
| 3243.9210 | 3246.3193 | 3247.0323 |
| 3248.2297 | 3268.3615 | 3858.8550 |

### <sup>os</sup>TS3

|                                              |              |              |
|----------------------------------------------|--------------|--------------|
| Zero-point correction=                       | 1.018351     |              |
| Thermal correction to Energy=                | 1.077970     |              |
| Thermal correction to Enthalpy=              | 1.078914     |              |
| Thermal correction to Gibbs Free Energy=     |              | 0.923977     |
| Sum of electronic and zero-point Energies=   |              | -3087.772116 |
| Sum of electronic and thermal Energies=      | -3087.712497 |              |
| Sum of electronic and thermal Enthalpies=    |              | -3087.711553 |
| Sum of electronic and thermal Free Energies= |              | -3087.866490 |

### Cartesian coordinates

|   |           |           |           |
|---|-----------|-----------|-----------|
| C | -1.299391 | -4.788498 | -2.407198 |
| C | -1.874371 | -3.551505 | -3.099826 |
| C | -2.244895 | -2.398018 | -2.156516 |
| C | 0.076905  | -4.612823 | -1.762571 |
| C | -1.054125 | -1.683301 | -1.585786 |
| C | 0.103589  | -3.680268 | -0.544638 |
| C | -0.025502 | -2.224643 | -0.895745 |
| H | -1.231524 | -5.593952 | -3.146483 |
| H | -2.780087 | -3.847769 | -3.639934 |
| H | -2.871505 | -2.780487 | -1.337691 |
| H | 0.791057  | -4.244004 | -2.508714 |
| H | -0.710647 | -3.951223 | 0.139880  |
| C | 0.722238  | -0.007730 | -0.984622 |

|   |           |           |           |
|---|-----------|-----------|-----------|
| H | -2.009430 | -5.131310 | -1.641182 |
| H | -1.162337 | -3.180195 | -3.847961 |
| H | -2.863582 | -1.681410 | -2.706844 |
| H | 0.434673  | -5.595660 | -1.439033 |
| H | 1.035978  | -3.829485 | 0.002604  |
| N | 0.977519  | -1.312848 | -0.560025 |
| C | 2.344039  | -1.795452 | -0.431850 |
| C | 3.095734  | -1.985621 | -1.603240 |
| C | 2.852155  | -2.107695 | 0.837168  |
| C | 4.400756  | -2.470177 | -1.468695 |
| C | 4.159079  | -2.589384 | 0.919690  |
| C | 4.934048  | -2.764312 | -0.221668 |
| H | 5.006395  | -2.617346 | -2.358359 |
| H | 4.575707  | -2.828142 | 1.894634  |
| H | 5.949897  | -3.138437 | -0.137000 |
| C | 2.566625  | -1.657693 | -2.991573 |
| C | 2.873710  | -2.762539 | -4.010797 |
| H | 2.342188  | -2.561723 | -4.945473 |
| H | 3.941889  | -2.803486 | -4.245111 |
| H | 2.572773  | -3.749081 | -3.648433 |
| C | 2.033195  | -1.941835 | 2.102491  |
| S | -0.795878 | 0.028028  | -1.852312 |
| H | 1.476473  | -1.559722 | -2.935383 |
| H | 1.050140  | -1.556807 | 1.812934  |
| C | 3.147384  | -0.325405 | -3.486338 |
| H | 4.237140  | -0.401171 | -3.568695 |
| H | 2.746576  | -0.079949 | -4.475029 |
| H | 2.917156  | 0.495058  | -2.802750 |
| C | 2.688158  | -0.925361 | 3.044162  |
| H | 2.007772  | -0.686271 | 3.871173  |
| H | 3.606208  | -1.334289 | 3.481272  |
| H | 2.950015  | -0.015547 | 2.499845  |
| C | 1.835113  | -3.282636 | 2.820006  |
| H | 1.293518  | -3.128964 | 3.756934  |
| H | 1.258489  | -3.988958 | 2.214782  |
| H | 2.799518  | -3.744017 | 3.057635  |
| C | 1.546591  | 1.059916  | -0.607605 |
| O | 2.434007  | 0.818962  | 0.317558  |
| H | 3.679017  | 0.710277  | -0.048646 |
| C | 1.581745  | 2.379968  | -1.281997 |
| C | 0.637410  | 2.869201  | -2.202628 |
| C | 2.665140  | 3.215209  | -0.953897 |
| C | 0.775441  | 4.137596  | -2.761338 |
| H | -0.221652 | 2.281079  | -2.502171 |

|   |           |           |           |
|---|-----------|-----------|-----------|
| C | 2.804041  | 4.474449  | -1.521112 |
| H | 3.386694  | 2.859253  | -0.228509 |
| C | 1.858891  | 4.947706  | -2.429273 |
| H | 0.028522  | 4.490239  | -3.466058 |
| H | 3.650517  | 5.094959  | -1.242031 |
| H | 1.962121  | 5.934074  | -2.870088 |
| C | 5.521909  | 0.478693  | 0.651065  |
| O | 6.713306  | -0.095671 | 0.355246  |
| O | 4.721720  | 0.530988  | -0.372901 |
| O | 5.317909  | 0.890824  | 1.778263  |
| H | 6.649521  | -0.432473 | -0.549666 |
| N | -2.734530 | 0.441619  | 1.124460  |
| C | -2.625405 | 1.564715  | 0.310442  |
| C | -1.533475 | 2.389338  | 0.393052  |
| H | -1.504461 | 3.234746  | -0.285338 |
| C | -0.453871 | 2.128846  | 1.268577  |
| C | -0.500267 | 0.868885  | 1.922328  |
| H | 0.357261  | 0.505218  | 2.478357  |
| C | -1.598460 | 0.056946  | 1.852027  |
| C | 0.564477  | 3.138998  | 1.561122  |
| C | 0.392479  | 4.472025  | 1.143398  |
| H | -0.503046 | 4.764604  | 0.605883  |
| C | 1.345613  | 5.439529  | 1.425845  |
| H | 1.187144  | 6.459879  | 1.090911  |
| C | 2.499281  | 5.106049  | 2.135670  |
| H | 3.244584  | 5.863747  | 2.355957  |
| C | 2.683091  | 3.792875  | 2.560880  |
| H | 3.578034  | 3.516669  | 3.109877  |
| C | 1.729374  | 2.820405  | 2.281083  |
| H | 1.903198  | 1.804521  | 2.609474  |
| C | -3.720125 | 1.882548  | -0.639195 |
| C | -4.145584 | 0.944832  | -1.587036 |
| H | -3.695150 | -0.042206 | -1.589853 |
| C | -5.133589 | 1.274661  | -2.508464 |
| H | -5.448383 | 0.542711  | -3.245879 |
| C | -5.707491 | 2.544697  | -2.493198 |
| H | -6.481523 | 2.799628  | -3.209529 |
| C | -5.280771 | 3.487814  | -1.560741 |
| H | -5.721954 | 4.478840  | -1.546151 |
| C | -4.287916 | 3.161611  | -0.642150 |
| H | -3.955876 | 3.892833  | 0.089703  |
| C | -1.629906 | -1.247241 | 2.549499  |
| C | -2.129965 | -2.384175 | 1.901115  |
| H | -2.506593 | -2.289800 | 0.886645  |

|   |           |           |           |
|---|-----------|-----------|-----------|
| C | -2.157123 | -3.609853 | 2.558490  |
| H | -2.543611 | -4.485796 | 2.046346  |
| C | -1.697120 | -3.712105 | 3.870777  |
| H | -1.728066 | -4.666915 | 4.385307  |
| C | -1.204616 | -2.583090 | 4.522456  |
| H | -0.853688 | -2.655169 | 5.546884  |
| C | -1.165892 | -1.356572 | 3.866204  |
| H | -0.805331 | -0.471207 | 4.381892  |
| C | -4.054803 | 0.164931  | 1.753673  |
| H | -3.878046 | -0.648461 | 2.460440  |
| C | -4.569772 | 1.375406  | 2.522098  |
| H | -4.864391 | 2.179873  | 1.845827  |
| H | -3.787234 | 1.735064  | 3.194531  |
| C | -5.113045 | -0.391091 | 0.806530  |
| O | -6.244312 | 0.023889  | 0.751077  |
| O | -4.675826 | -1.458898 | 0.130169  |
| C | -5.649596 | -2.068153 | -0.728470 |
| H | -5.167231 | -2.944161 | -1.156890 |
| H | -6.530591 | -2.354933 | -0.153232 |
| H | -5.941272 | -1.366703 | -1.514006 |
| H | -5.441066 | 1.089305  | 3.112963  |

Vibrational frequencies

|            |          |          |
|------------|----------|----------|
| -1162.6049 | 11.2171  | 21.5395  |
| 28.6998    | 34.6314  | 35.9151  |
| 38.5076    | 41.0922  | 45.2736  |
| 52.6100    | 53.4470  | 56.0605  |
| 60.4807    | 63.4615  | 66.4184  |
| 68.6973    | 69.5162  | 74.6240  |
| 86.5485    | 89.1815  | 92.5826  |
| 95.2475    | 97.1096  | 98.0752  |
| 105.3164   | 107.6578 | 109.6610 |
| 113.2417   | 114.5989 | 117.9740 |
| 123.7963   | 129.3880 | 137.4403 |
| 139.5328   | 145.4511 | 151.5043 |
| 155.6882   | 164.0648 | 168.1227 |
| 175.4461   | 189.2583 | 190.4352 |
| 196.0549   | 209.9696 | 222.1850 |
| 230.0557   | 232.0604 | 234.3754 |
| 245.0518   | 248.4379 | 254.5780 |
| 255.2839   | 264.1202 | 266.2375 |
| 269.4612   | 273.7020 | 279.3699 |
| 280.7405   | 289.2886 | 294.8261 |
| 299.6463   | 306.3758 | 321.2432 |



|           |           |           |
|-----------|-----------|-----------|
| 325.4209  | 333.3843  | 337.3314  |
| 353.4550  | 357.6458  | 373.0583  |
| 384.6834  | 397.5433  | 406.6555  |
| 408.4236  | 412.8755  | 415.6974  |
| 419.1577  | 424.9373  | 425.6714  |
| 429.3539  | 442.4743  | 454.1573  |
| 465.1278  | 466.0858  | 473.1621  |
| 474.1423  | 502.7824  | 513.0001  |
| 514.9888  | 524.7497  | 525.2808  |
| 550.9611  | 563.0649  | 569.1103  |
| 570.9461  | 578.1762  | 596.7195  |
| 603.4026  | 607.1118  | 620.5316  |
| 621.9984  | 623.7636  | 625.6056  |
| 626.8100  | 630.8082  | 633.2346  |
| 643.2857  | 648.6495  | 653.5604  |
| 654.7189  | 660.8488  | 672.5711  |
| 680.0858  | 694.0473  | 700.9763  |
| 707.4232  | 718.8337  | 719.4661  |
| 724.9774  | 731.0927  | 751.4113  |
| 769.5988  | 776.0574  | 777.0385  |
| 783.7345  | 790.3907  | 791.8269  |
| 798.4530  | 810.9953  | 814.5902  |
| 818.6318  | 827.8308  | 830.9596  |
| 834.3500  | 840.2262  | 849.9532  |
| 853.4758  | 858.1975  | 873.7714  |
| 876.8824  | 880.0758  | 894.9396  |
| 898.3174  | 901.1861  | 916.3344  |
| 917.0461  | 922.3059  | 924.7086  |
| 930.3004  | 935.3637  | 936.5091  |
| 947.3207  | 957.2970  | 957.4758  |
| 966.9264  | 969.1990  | 971.5171  |
| 974.0419  | 980.3736  | 986.8225  |
| 993.8904  | 994.6519  | 1004.6088 |
| 1005.2267 | 1007.2448 | 1007.7130 |
| 1008.3914 | 1010.6461 | 1011.6851 |
| 1014.3343 | 1017.8463 | 1019.3435 |
| 1028.0542 | 1029.0938 | 1041.7580 |
| 1051.4936 | 1056.9348 | 1063.3105 |
| 1069.3158 | 1070.8849 | 1072.3906 |
| 1073.2477 | 1078.8083 | 1081.3080 |
| 1083.6975 | 1096.3602 | 1098.6125 |
| 1111.8566 | 1115.7280 | 1119.8469 |
| 1121.0254 | 1124.3816 | 1128.4238 |
| 1138.9834 | 1143.9734 | 1145.5962 |

|           |           |           |
|-----------|-----------|-----------|
| 1153.7605 | 1162.6978 | 1171.9735 |
| 1173.1510 | 1177.2961 | 1178.8162 |
| 1180.2704 | 1182.3096 | 1183.8052 |
| 1184.9364 | 1188.1407 | 1189.5260 |
| 1196.2651 | 1197.5063 | 1207.3409 |
| 1207.7205 | 1222.1132 | 1223.9366 |
| 1227.8122 | 1234.6935 | 1240.9655 |
| 1249.9688 | 1250.8657 | 1277.5773 |
| 1278.6128 | 1280.1762 | 1289.0583 |
| 1291.1935 | 1298.3172 | 1304.2205 |
| 1308.9875 | 1313.6252 | 1326.6102 |
| 1327.2207 | 1331.2548 | 1331.4124 |
| 1339.2187 | 1340.5494 | 1347.0911 |
| 1350.6773 | 1354.2564 | 1361.0837 |
| 1364.1421 | 1368.4927 | 1370.1718 |
| 1372.6426 | 1376.8153 | 1383.4340 |
| 1386.1135 | 1393.1783 | 1399.4748 |
| 1402.4939 | 1403.3029 | 1408.5129 |
| 1414.5870 | 1417.5070 | 1420.1013 |
| 1422.0289 | 1424.7794 | 1428.1553 |
| 1433.7842 | 1448.2835 | 1467.5642 |
| 1474.0632 | 1477.1701 | 1487.2886 |
| 1487.4976 | 1487.8366 | 1488.7319 |
| 1489.2372 | 1489.9978 | 1491.8691 |
| 1492.7416 | 1494.0365 | 1495.3183 |
| 1498.2887 | 1499.0709 | 1499.9907 |
| 1503.0672 | 1504.0290 | 1505.0034 |
| 1505.6344 | 1514.7957 | 1517.0071 |
| 1520.0172 | 1520.5464 | 1530.3655 |
| 1533.6624 | 1548.8725 | 1549.6568 |
| 1561.1401 | 1573.0157 | 1586.8100 |
| 1650.6350 | 1661.1835 | 1661.3002 |
| 1666.4998 | 1672.3852 | 1677.8507 |
| 1680.9174 | 1684.0098 | 1689.6534 |
| 1691.7814 | 1692.8021 | 1695.4679 |
| 1698.4763 | 1868.7893 | 1914.9011 |
| 3041.1053 | 3045.6704 | 3046.8911 |
| 3059.1827 | 3061.9311 | 3062.1033 |
| 3065.1691 | 3069.8067 | 3075.2221 |
| 3087.5314 | 3094.7423 | 3100.4186 |
| 3105.0535 | 3106.3551 | 3107.2743 |
| 3111.7493 | 3121.1255 | 3123.2111 |
| 3136.1125 | 3141.3163 | 3142.4430 |
| 3142.7265 | 3151.2309 | 3152.6257 |

|           |           |           |
|-----------|-----------|-----------|
| 3157.4538 | 3162.4206 | 3173.6972 |
| 3182.8675 | 3186.0435 | 3189.8740 |
| 3191.3042 | 3197.6545 | 3200.0024 |
| 3200.7128 | 3201.6113 | 3205.7344 |
| 3206.9825 | 3209.4149 | 3212.8348 |
| 3213.5290 | 3214.9671 | 3215.0973 |
| 3215.3973 | 3216.5083 | 3223.1945 |
| 3224.0073 | 3224.2193 | 3227.5692 |
| 3227.8184 | 3228.2914 | 3231.6982 |
| 3234.2522 | 3238.6346 | 3257.5998 |
| 3264.0586 | 3265.1287 | 3853.2995 |

## <sup>2</sup>M4

|                                              |          |              |
|----------------------------------------------|----------|--------------|
| Zero-point correction=                       | 0.445647 |              |
| Thermal correction to Energy=                | 0.471134 |              |
| Thermal correction to Enthalpy=              | 0.472078 |              |
| Thermal correction to Gibbs Free Energy=     |          | 0.388789     |
| Sum of electronic and zero-point Energies=   |          | -1247.582807 |
| Sum of electronic and thermal Energies=      |          | -1247.557320 |
| Sum of electronic and thermal Enthalpies=    |          | -1247.556376 |
| Sum of electronic and thermal Free Energies= |          | -1247.639664 |

## Cartesian coordinates

|   |           |           |           |
|---|-----------|-----------|-----------|
| N | 0.546409  | 0.257335  | 0.101895  |
| C | 0.038979  | -1.046765 | -0.100103 |
| C | -1.303668 | -1.283491 | -0.147216 |
| H | -1.623059 | -2.302011 | -0.345787 |
| C | -2.261839 | -0.234386 | -0.080117 |
| C | -1.725135 | 1.075276  | -0.083600 |
| H | -2.381105 | 1.933577  | -0.180131 |
| C | -0.379406 | 1.322066  | -0.008282 |
| C | -3.700852 | -0.501041 | -0.111643 |
| C | -4.211573 | -1.737199 | 0.328365  |
| H | -3.532932 | -2.487105 | 0.722995  |
| C | -5.575324 | -2.002912 | 0.301716  |
| H | -5.939594 | -2.962866 | 0.654460  |
| C | -6.473868 | -1.041945 | -0.159653 |
| H | -7.538668 | -1.248969 | -0.178121 |
| C | -5.986127 | 0.189605  | -0.596267 |
| H | -6.672333 | 0.944869  | -0.966900 |
| C | -4.622928 | 0.456765  | -0.575224 |
| H | -4.268972 | 1.411422  | -0.950875 |
| C | 1.022055  | -2.129624 | -0.323448 |
| C | 2.024417  | -1.983576 | -1.292737 |

|   |           |           |           |
|---|-----------|-----------|-----------|
| H | 2.085796  | -1.057506 | -1.856588 |
| C | 2.926371  | -3.015235 | -1.531176 |
| H | 3.691060  | -2.895537 | -2.292632 |
| C | 2.842504  | -4.203444 | -0.805643 |
| H | 3.551886  | -5.003824 | -0.988497 |
| C | 1.841928  | -4.360361 | 0.151039  |
| H | 1.771153  | -5.282823 | 0.718228  |
| C | 0.935251  | -3.331361 | 0.389192  |
| H | 0.161131  | -3.446532 | 1.142954  |
| C | 0.163487  | 2.690654  | -0.109682 |
| C | 1.372550  | 2.928969  | -0.781778 |
| H | 1.920992  | 2.088705  | -1.196008 |
| C | 1.860944  | 4.224069  | -0.917003 |
| H | 2.794410  | 4.392168  | -1.444906 |
| C | 1.157038  | 5.302482  | -0.383550 |
| H | 1.541739  | 6.311563  | -0.488633 |
| C | -0.039250 | 5.074272  | 0.294893  |
| H | -0.586539 | 5.905487  | 0.727987  |
| C | -0.528975 | 3.780828  | 0.437442  |
| H | -1.445461 | 3.608399  | 0.993675  |
| C | 1.532157  | 0.397025  | 1.208034  |
| H | 1.672694  | 1.473181  | 1.343264  |
| C | 1.019868  | -0.211721 | 2.506462  |
| H | 0.974724  | -1.300990 | 2.437631  |
| H | 0.019624  | 0.176573  | 2.714911  |
| C | 2.922291  | -0.127054 | 0.859364  |
| O | 3.548267  | -0.902460 | 1.541855  |
| O | 3.409458  | 0.452159  | -0.241549 |
| C | 4.729667  | 0.042553  | -0.614635 |
| H | 4.966796  | 0.594082  | -1.521661 |
| H | 5.437632  | 0.283878  | 0.180054  |
| H | 4.745486  | -1.033444 | -0.801258 |
| H | 1.683484  | 0.052071  | 3.331639  |

Vibrational frequencies

|          |          |          |
|----------|----------|----------|
| 21.6642  | 44.9263  | 48.3586  |
| 50.7827  | 54.8405  | 61.2821  |
| 74.7307  | 83.1200  | 95.4166  |
| 104.9710 | 121.3658 | 138.3361 |
| 149.3375 | 153.7057 | 181.2772 |
| 214.7651 | 226.4847 | 239.7005 |
| 246.8033 | 246.8572 | 258.8383 |
| 265.8353 | 295.8708 | 298.3678 |
| 347.9751 | 376.6800 | 403.8926 |

|           |           |           |
|-----------|-----------|-----------|
| 416.3770  | 418.4683  | 421.2867  |
| 424.6409  | 464.8483  | 484.2914  |
| 509.4351  | 515.8871  | 574.4194  |
| 590.5150  | 599.6276  | 617.0722  |
| 624.7027  | 627.5778  | 631.6288  |
| 638.7541  | 651.2396  | 677.7724  |
| 715.4237  | 719.3861  | 719.6048  |
| 723.7070  | 762.9364  | 783.4445  |
| 785.3980  | 790.3307  | 808.7021  |
| 846.6845  | 855.1931  | 874.0709  |
| 876.5755  | 882.8264  | 894.8337  |
| 902.3815  | 917.5658  | 942.2853  |
| 955.8501  | 956.5663  | 1001.3454 |
| 1004.1192 | 1005.6019 | 1008.8155 |
| 1009.4753 | 1011.6302 | 1015.2412 |
| 1024.7855 | 1026.9428 | 1027.0970 |
| 1038.0062 | 1054.9984 | 1058.2095 |
| 1071.2460 | 1072.9928 | 1080.7507 |
| 1088.7468 | 1119.4349 | 1120.8141 |
| 1124.3283 | 1137.3747 | 1173.2496 |
| 1175.1311 | 1177.7056 | 1180.0657 |
| 1182.8003 | 1185.2951 | 1207.0978 |
| 1207.9433 | 1219.1927 | 1225.6421 |
| 1267.5046 | 1273.7920 | 1278.2569 |
| 1314.4089 | 1324.9535 | 1328.7032 |
| 1337.4472 | 1354.6009 | 1361.9134 |
| 1363.5161 | 1373.9279 | 1388.5357 |
| 1393.8491 | 1409.1437 | 1439.8424 |
| 1444.0199 | 1485.2718 | 1488.0682 |
| 1491.3968 | 1492.6192 | 1497.3708 |
| 1501.3985 | 1501.4866 | 1501.9637 |
| 1534.1192 | 1547.7439 | 1556.1628 |
| 1559.1143 | 1654.6286 | 1656.0243 |
| 1665.6475 | 1672.5925 | 1689.2184 |
| 1693.9182 | 1694.7369 | 1860.4956 |
| 3079.9378 | 3089.4062 | 3137.2687 |
| 3168.2455 | 3174.4801 | 3175.1972 |
| 3201.1953 | 3206.3956 | 3207.6036 |
| 3207.7828 | 3210.6566 | 3213.4239 |
| 3213.9275 | 3215.4226 | 3217.4894 |
| 3219.4009 | 3221.0324 | 3224.1015 |
| 3224.7128 | 3226.3545 | 3230.8988 |
| 3233.7547 | 3235.6157 | 3239.0627 |

**<sup>2</sup>M5**

|                                              |              |              |
|----------------------------------------------|--------------|--------------|
| Zero-point correction=                       | 0.533230     |              |
| Thermal correction to Energy=                | 0.562185     |              |
| Thermal correction to Enthalpy=              | 0.563129     |              |
| Thermal correction to Gibbs Free Energy=     |              | 0.471694     |
| Sum of electronic and zero-point Energies=   |              | -1575.271146 |
| Sum of electronic and thermal Energies=      | -1575.242191 |              |
| Sum of electronic and thermal Enthalpies=    |              | -1575.241247 |
| Sum of electronic and thermal Free Energies= |              | -1575.332682 |

## Cartesian coordinates

|   |           |           |           |
|---|-----------|-----------|-----------|
| C | 3.842271  | -3.244428 | 0.140241  |
| C | 2.559260  | -4.057262 | -0.049302 |
| C | 1.405635  | -3.657635 | 0.880709  |
| C | 3.767051  | -1.766991 | -0.253253 |
| C | 0.784464  | -2.335242 | 0.534413  |
| C | 2.870917  | -0.900856 | 0.644964  |
| C | 1.402897  | -1.137591 | 0.431250  |
| H | 4.636127  | -3.714787 | -0.449948 |
| H | 2.790259  | -5.111366 | 0.137164  |
| H | 1.769170  | -3.627358 | 1.916886  |
| H | 3.432000  | -1.674381 | -1.294752 |
| H | 3.112638  | -1.100149 | 1.697385  |
| C | -0.777725 | -0.477927 | -0.082535 |
| H | 4.156415  | -3.314902 | 1.190919  |
| H | 2.221913  | -3.983817 | -1.090372 |
| H | 0.632376  | -4.430777 | 0.848817  |
| H | 4.778774  | -1.349172 | -0.210582 |
| H | 3.092425  | 0.154654  | 0.471120  |
| N | 0.537567  | -0.096163 | 0.086269  |
| C | 0.942400  | 1.285044  | 0.145074  |
| C | 1.643824  | 1.829525  | -0.938888 |
| C | 0.651285  | 2.015019  | 1.304031  |
| C | 2.035062  | 3.165789  | -0.851027 |
| C | 1.054741  | 3.352404  | 1.342763  |
| C | 1.737544  | 3.925003  | 0.276574  |
| H | 2.570760  | 3.621872  | -1.678538 |
| H | 0.831080  | 3.949854  | 2.222155  |
| H | 2.043760  | 4.965201  | 0.324829  |
| C | 1.932091  | 1.019809  | -2.189886 |
| C | 3.399736  | 1.115192  | -2.616230 |
| H | 3.587600  | 0.450122  | -3.464271 |
| H | 3.660080  | 2.131306  | -2.928438 |
| H | 4.071778  | 0.828281  | -1.800777 |

|   |           |           |           |
|---|-----------|-----------|-----------|
| C | -0.095971 | 1.413008  | 2.481663  |
| S | -0.930256 | -2.194036 | 0.213231  |
| H | 1.717976  | -0.031924 | -1.971622 |
| H | -0.212677 | 0.338676  | 2.305844  |
| C | 0.990345  | 1.456935  | -3.318844 |
| H | 1.186349  | 2.499153  | -3.594092 |
| H | 1.141240  | 0.836297  | -4.207379 |
| H | -0.050381 | 1.378157  | -2.993273 |
| C | -1.497670 | 2.026157  | 2.594288  |
| H | -2.066713 | 1.536504  | 3.390265  |
| H | -1.430455 | 3.093155  | 2.832788  |
| H | -2.046379 | 1.923463  | 1.653848  |
| C | 0.686668  | 1.579452  | 3.788599  |
| H | 0.157919  | 1.085840  | 4.609013  |
| H | 1.684878  | 1.139635  | 3.707402  |
| H | 0.800602  | 2.635235  | 4.053535  |
| C | -1.811310 | 0.372919  | -0.573113 |
| O | -1.578687 | 1.513371  | -1.039437 |
| C | -3.222070 | -0.134429 | -0.556028 |
| C | -3.769624 | -0.828104 | 0.528186  |
| C | -4.040043 | 0.177422  | -1.647893 |
| C | -5.103750 | -1.229800 | 0.505157  |
| H | -3.161743 | -1.030478 | 1.405650  |
| C | -5.367787 | -0.232204 | -1.675228 |
| H | -3.614348 | 0.743553  | -2.470385 |
| C | -5.902225 | -0.940989 | -0.598786 |
| H | -5.521711 | -1.758623 | 1.355803  |
| H | -5.989006 | 0.003789  | -2.533421 |
| H | -6.940162 | -1.257597 | -0.617049 |

#### Vibrational frequencies

|          |          |          |
|----------|----------|----------|
| 14.4779  | 20.3480  | 35.8536  |
| 43.5421  | 49.6825  | 53.3321  |
| 61.4821  | 66.8007  | 79.9592  |
| 89.3898  | 109.1258 | 113.5619 |
| 126.2481 | 136.4570 | 168.1669 |
| 200.3992 | 201.9261 | 212.9965 |
| 227.6467 | 233.5501 | 243.3942 |
| 256.4437 | 258.8526 | 264.6155 |
| 270.4654 | 287.0498 | 298.2258 |
| 316.1359 | 326.1687 | 330.4608 |
| 344.5002 | 357.3234 | 385.5897 |
| 401.8134 | 410.0229 | 419.3839 |
| 442.3402 | 447.0812 | 469.3136 |

|           |           |           |
|-----------|-----------|-----------|
| 481.0337  | 502.3052  | 525.1897  |
| 553.9918  | 561.8635  | 565.1162  |
| 598.7840  | 612.7928  | 626.4046  |
| 646.0188  | 653.3200  | 664.2995  |
| 686.2451  | 714.8512  | 722.0479  |
| 724.1853  | 776.1940  | 792.0300  |
| 795.9829  | 816.9300  | 828.4974  |
| 830.4505  | 834.5144  | 883.5942  |
| 893.3438  | 901.2691  | 915.2358  |
| 933.5872  | 935.0728  | 945.3345  |
| 949.6142  | 958.8927  | 967.2653  |
| 968.7902  | 975.0692  | 976.6050  |
| 987.8677  | 1005.1939 | 1009.3020 |
| 1010.7502 | 1018.2751 | 1029.4450 |
| 1063.1592 | 1070.7434 | 1074.5758 |
| 1084.0133 | 1098.8673 | 1113.4365 |
| 1121.0136 | 1122.5253 | 1144.7951 |
| 1149.1536 | 1164.1089 | 1170.5716 |
| 1173.1047 | 1177.8430 | 1184.7029 |
| 1192.1729 | 1195.8018 | 1211.0000 |
| 1238.2465 | 1247.2081 | 1252.4757 |
| 1284.7759 | 1291.9965 | 1293.7925 |
| 1303.4767 | 1318.5545 | 1324.7714 |
| 1335.5694 | 1346.6176 | 1354.9248 |
| 1355.7051 | 1356.8411 | 1374.7830 |
| 1383.5670 | 1390.3841 | 1395.7101 |
| 1398.2461 | 1401.7633 | 1405.2749 |
| 1406.2247 | 1414.9861 | 1420.7390 |
| 1424.9326 | 1467.3227 | 1478.2217 |
| 1481.7462 | 1483.1236 | 1488.3841 |
| 1490.1030 | 1491.5513 | 1492.7592 |
| 1494.0137 | 1497.0735 | 1497.4779 |
| 1505.1499 | 1506.6200 | 1509.6206 |
| 1511.9987 | 1526.6674 | 1532.2378 |
| 1544.2859 | 1624.1482 | 1672.0651 |
| 1677.0716 | 1684.4568 | 1688.6997 |
| 1692.8933 | 3050.1500 | 3051.8575 |
| 3054.4970 | 3056.3675 | 3058.6065 |
| 3060.0372 | 3064.7433 | 3065.5332 |
| 3069.9218 | 3099.6531 | 3100.3954 |
| 3105.6038 | 3110.3659 | 3117.3942 |
| 3119.2618 | 3136.9063 | 3138.2842 |
| 3138.7498 | 3144.2744 | 3145.3699 |
| 3145.7441 | 3153.2976 | 3153.8153 |



|           |           |           |
|-----------|-----------|-----------|
| 3154.6473 | 3202.2913 | 3207.3671 |
| 3212.8520 | 3214.9701 | 3216.1443 |
| 3224.5082 | 3228.6969 | 3236.1922 |

## <sup>2</sup>TS4

|                                              |              |              |
|----------------------------------------------|--------------|--------------|
| Zero-point correction=                       | 0.442970     |              |
| Thermal correction to Energy=                | 0.468470     |              |
| Thermal correction to Enthalpy=              | 0.469414     |              |
| Thermal correction to Gibbs Free Energy=     |              | 0.385790     |
| Sum of electronic and zero-point Energies=   |              | -1247.558909 |
| Sum of electronic and thermal Energies=      | -1247.533409 |              |
| Sum of electronic and thermal Enthalpies=    |              | -1247.532465 |
| Sum of electronic and thermal Free Energies= |              | -1247.616089 |

## Cartesian coordinates

|   |           |           |           |
|---|-----------|-----------|-----------|
| N | 0.511935  | 0.271050  | -0.219094 |
| C | 0.007048  | -0.996431 | -0.328092 |
| C | -1.350367 | -1.260608 | -0.261153 |
| H | -1.696098 | -2.281529 | -0.388711 |
| C | -2.274880 | -0.211255 | -0.145552 |
| C | -1.754636 | 1.089154  | -0.149990 |
| H | -2.427814 | 1.939078  | -0.142621 |
| C | -0.385316 | 1.308328  | -0.204675 |
| C | -3.728931 | -0.468318 | -0.082530 |
| C | -4.220827 | -1.614992 | 0.556012  |
| H | -3.526957 | -2.304445 | 1.028028  |
| C | -5.588311 | -1.862936 | 0.617385  |
| H | -5.950700 | -2.752425 | 1.122773  |
| C | -6.489494 | -0.969651 | 0.041388  |
| H | -7.556101 | -1.162937 | 0.089482  |
| C | -6.012109 | 0.173527  | -0.597199 |
| H | -6.706210 | 0.870584  | -1.055663 |
| C | -4.645406 | 0.422543  | -0.659108 |
| H | -4.284911 | 1.302756  | -1.183033 |
| C | 0.998335  | -2.072782 | -0.548330 |
| C | 2.122488  | -1.824798 | -1.345162 |
| H | 2.257471  | -0.835247 | -1.771990 |
| C | 3.049698  | -2.833740 | -1.584277 |
| H | 3.909908  | -2.636121 | -2.216861 |
| C | 2.874199  | -4.095997 | -1.018933 |
| H | 3.602340  | -4.879925 | -1.200163 |
| C | 1.760776  | -4.347746 | -0.219277 |
| H | 1.623612  | -5.325722 | 0.230638  |
| C | 0.825759  | -3.343937 | 0.011697  |

|   |           |           |           |
|---|-----------|-----------|-----------|
| H | -0.031634 | -3.538829 | 0.650105  |
| C | 0.189365  | 2.672408  | -0.263928 |
| C | 1.471400  | 2.862147  | -0.800607 |
| H | 2.028064  | 1.996031  | -1.144217 |
| C | 2.024372  | 4.136001  | -0.876499 |
| H | 3.015497  | 4.266575  | -1.299307 |
| C | 1.310673  | 5.240521  | -0.415493 |
| H | 1.742605  | 6.234195  | -0.475995 |
| C | 0.041497  | 5.060308  | 0.132277  |
| H | -0.514875 | 5.912741  | 0.508573  |
| C | -0.513233 | 3.787773  | 0.212274  |
| H | -1.488902 | 3.662742  | 0.670935  |
| C | 1.571025  | 0.400516  | 1.423083  |
| H | 1.618207  | 1.484894  | 1.412253  |
| C | 0.709508  | -0.236724 | 2.465760  |
| H | 0.660012  | -1.318798 | 2.315897  |
| H | -0.302078 | 0.179512  | 2.432972  |
| C | 2.873575  | -0.233469 | 1.170443  |
| O | 3.265582  | -1.265078 | 1.685949  |
| O | 3.615083  | 0.475489  | 0.294522  |
| C | 4.902207  | -0.070400 | 0.010701  |
| H | 5.360923  | 0.603233  | -0.710908 |
| H | 5.505550  | -0.121954 | 0.919813  |
| H | 4.803916  | -1.073767 | -0.409835 |
| H | 1.118815  | -0.057934 | 3.466445  |

#### Vibrational frequencies

|           |          |          |
|-----------|----------|----------|
| -644.6122 | 23.0843  | 41.9888  |
| 43.4552   | 46.7353  | 55.2340  |
| 60.1356   | 66.4167  | 81.1841  |
| 90.5510   | 102.7175 | 120.8274 |
| 128.1567  | 157.7120 | 183.1938 |
| 196.1794  | 198.7549 | 222.9436 |
| 239.5948  | 241.3362 | 244.0297 |
| 245.7756  | 265.5459 | 284.6437 |
| 304.0732  | 330.8541 | 350.5164 |
| 404.7832  | 415.4421 | 418.0981 |
| 424.3464  | 424.8930 | 452.4007 |
| 475.5516  | 491.9537 | 513.9457 |
| 588.8906  | 615.7014 | 622.0517 |
| 626.1494  | 630.3592 | 633.4426 |
| 641.9175  | 656.8721 | 671.8102 |
| 682.1270  | 716.1383 | 718.2939 |
| 720.8277  | 747.7082 | 752.7718 |

|           |           |           |
|-----------|-----------|-----------|
| 784.7574  | 798.4904  | 802.7024  |
| 837.1485  | 853.7912  | 874.9522  |
| 881.6906  | 885.0769  | 886.2772  |
| 914.2291  | 921.9711  | 932.5475  |
| 954.5237  | 962.0876  | 963.8351  |
| 971.3070  | 1004.7949 | 1009.2103 |
| 1010.9314 | 1013.0712 | 1015.3999 |
| 1015.6614 | 1026.5559 | 1030.0983 |
| 1031.0277 | 1038.4447 | 1049.1654 |
| 1061.5379 | 1069.5227 | 1071.1743 |
| 1085.2442 | 1096.7891 | 1111.5773 |
| 1119.6328 | 1122.0002 | 1123.7292 |
| 1167.8778 | 1174.0466 | 1178.4384 |
| 1179.7580 | 1183.2886 | 1190.9103 |
| 1207.1024 | 1207.7256 | 1213.7385 |
| 1218.4830 | 1240.7769 | 1268.4635 |
| 1281.5535 | 1300.1575 | 1325.2792 |
| 1329.3938 | 1339.4885 | 1360.1750 |
| 1363.2099 | 1364.6513 | 1368.2440 |
| 1401.9386 | 1427.1405 | 1443.0686 |
| 1466.8849 | 1478.2353 | 1484.0379 |
| 1493.9318 | 1498.4520 | 1498.9570 |
| 1505.9056 | 1507.2017 | 1511.4100 |
| 1550.0357 | 1558.0039 | 1559.4342 |
| 1562.0801 | 1656.2873 | 1666.6659 |
| 1669.5326 | 1672.2884 | 1693.7589 |
| 1694.6376 | 1696.3218 | 1787.9208 |
| 3057.6592 | 3092.3865 | 3129.4730 |
| 3152.9790 | 3175.2815 | 3202.1034 |
| 3202.5165 | 3205.6546 | 3206.0717 |
| 3206.1365 | 3207.9029 | 3213.2861 |
| 3215.8390 | 3217.8126 | 3218.5465 |
| 3221.9258 | 3224.4804 | 3226.5369 |
| 3228.9411 | 3231.9484 | 3234.8414 |
| 3237.5487 | 3240.5860 | 3240.9806 |

## <sup>2</sup>M6

|                                            |             |             |
|--------------------------------------------|-------------|-------------|
| Zero-point correction=                     | 0.106107    |             |
| Thermal correction to Energy=              | 0.113404    |             |
| Thermal correction to Enthalpy=            | 0.114349    |             |
| Thermal correction to Gibbs Free Energy=   |             | 0.074222    |
| Sum of electronic and zero-point Energies= |             | -306.812541 |
| Sum of electronic and thermal Energies=    | -306.805243 |             |
| Sum of electronic and thermal Enthalpies=  |             | -306.804299 |

Sum of electronic and thermal Free Energies= -306.844425

Cartesian coordinates

|   |           |           |           |
|---|-----------|-----------|-----------|
| C | 1.210991  | -0.670957 | 0.000146  |
| H | 1.147558  | -1.752330 | 0.000348  |
| C | 2.522921  | 0.016030  | -0.000293 |
| H | 2.388923  | 1.098272  | -0.000307 |
| H | 3.112627  | -0.270536 | -0.878769 |
| C | -0.026845 | 0.080951  | 0.000283  |
| O | -0.109669 | 1.299675  | 0.000278  |
| O | -1.109472 | -0.724460 | 0.000358  |
| C | -2.366429 | -0.048521 | -0.000442 |
| H | -3.125668 | -0.828203 | -0.001603 |
| H | -2.464765 | 0.577837  | 0.888879  |
| H | -2.462986 | 0.578874  | -0.889214 |
| H | 3.113611  | -0.270646 | 0.877414  |

Vibrational frequencies

|           |           |           |
|-----------|-----------|-----------|
| 102.7370  | 115.0844  | 127.9173  |
| 197.3535  | 221.6562  | 346.9435  |
| 471.5868  | 596.1166  | 680.9716  |
| 725.6487  | 887.7418  | 993.4303  |
| 1036.3726 | 1090.5581 | 1175.5640 |
| 1179.9807 | 1216.5895 | 1253.1257 |
| 1404.6713 | 1441.7853 | 1478.3359 |
| 1480.3481 | 1486.3027 | 1501.0665 |
| 1522.3738 | 1767.7523 | 3060.5047 |
| 3088.5098 | 3116.9081 | 3171.8892 |
| 3178.7897 | 3205.5974 | 3251.2410 |

**M7**

|                                              |             |             |
|----------------------------------------------|-------------|-------------|
| Zero-point correction=                       | 0.334829    |             |
| Thermal correction to Energy=                | 0.352899    |             |
| Thermal correction to Enthalpy=              | 0.353843    |             |
| Thermal correction to Gibbs Free Energy=     |             | 0.286825    |
| Sum of electronic and zero-point Energies=   |             | -940.759593 |
| Sum of electronic and thermal Energies=      | -940.741523 |             |
| Sum of electronic and thermal Enthalpies=    |             | -940.740579 |
| Sum of electronic and thermal Free Energies= |             | -940.807597 |

Cartesian coordinates

|   |           |          |           |
|---|-----------|----------|-----------|
| N | 1.313527  | 0.022212 | -0.067932 |
| C | 0.613835  | 1.162751 | -0.034702 |
| C | -0.783016 | 1.179856 | 0.002679  |

|   |           |           |           |
|---|-----------|-----------|-----------|
| H | -1.317087 | 2.119547  | 0.089945  |
| C | -1.483143 | -0.027570 | -0.000247 |
| C | -0.741101 | -1.209090 | -0.042018 |
| H | -1.245349 | -2.168960 | -0.037889 |
| C | 0.654137  | -1.142609 | -0.076124 |
| C | -2.965557 | -0.053010 | 0.064237  |
| C | -3.721834 | 0.920835  | -0.598181 |
| H | -3.218751 | 1.686745  | -1.181092 |
| C | -5.111734 | 0.898165  | -0.538458 |
| H | -5.684648 | 1.654977  | -1.064240 |
| C | -5.764701 | -0.095823 | 0.187670  |
| H | -6.848590 | -0.112636 | 0.235601  |
| C | -5.020139 | -1.068190 | 0.852259  |
| H | -5.521882 | -1.841149 | 1.425243  |
| C | -3.630405 | -1.048441 | 0.790034  |
| H | -3.056101 | -1.796460 | 1.328442  |
| C | 1.403085  | 2.424628  | -0.010647 |
| C | 2.702567  | 2.417373  | 0.508410  |
| H | 3.110981  | 1.483687  | 0.880186  |
| C | 3.452549  | 3.587484  | 0.552912  |
| H | 4.456187  | 3.568760  | 0.965687  |
| C | 2.917306  | 4.781283  | 0.071203  |
| H | 3.503207  | 5.694151  | 0.103113  |
| C | 1.628696  | 4.795642  | -0.457430 |
| H | 1.210068  | 5.718095  | -0.846637 |
| C | 0.875634  | 3.625393  | -0.498405 |
| H | -0.118197 | 3.645804  | -0.935283 |
| C | 1.487889  | -2.375795 | -0.109232 |
| C | 2.790931  | -2.341463 | 0.400012  |
| H | 3.169293  | -1.408705 | 0.804359  |
| C | 3.583845  | -3.483813 | 0.392647  |
| H | 4.589650  | -3.443645 | 0.798531  |
| C | 3.088785  | -4.676826 | -0.132050 |
| H | 3.707538  | -5.568259 | -0.139523 |
| C | 1.797128  | -4.717487 | -0.651600 |
| H | 1.408464  | -5.638723 | -1.073430 |
| C | 1.001078  | -3.575236 | -0.640624 |
| H | 0.005501  | -3.617049 | -1.071565 |

Vibrational frequencies

|          |          |          |
|----------|----------|----------|
| 41.0900  | 44.7091  | 47.3177  |
| 49.1361  | 63.6525  | 67.5483  |
| 114.8245 | 121.9006 | 168.7025 |
| 239.1457 | 241.9694 | 251.7851 |

|           |           |           |
|-----------|-----------|-----------|
| 266.9168  | 290.4614  | 302.4587  |
| 400.2034  | 413.0379  | 416.8702  |
| 418.7377  | 422.1684  | 440.0020  |
| 495.7601  | 514.8892  | 589.1603  |
| 621.3029  | 625.2744  | 628.1557  |
| 633.2311  | 642.8038  | 653.3104  |
| 670.8885  | 683.5090  | 718.4793  |
| 719.6726  | 721.0340  | 765.4175  |
| 788.6839  | 805.8034  | 810.8749  |
| 843.8495  | 858.1541  | 878.3576  |
| 882.0892  | 883.0018  | 912.2878  |
| 929.4385  | 959.7759  | 964.8132  |
| 966.1310  | 1007.0192 | 1010.2290 |
| 1010.9643 | 1011.7854 | 1016.4436 |
| 1016.8439 | 1024.2681 | 1030.8677 |
| 1033.2314 | 1035.3620 | 1052.3682 |
| 1067.9335 | 1069.4554 | 1085.3198 |
| 1114.5263 | 1116.6494 | 1119.8298 |
| 1132.7182 | 1169.9404 | 1178.0071 |
| 1180.1129 | 1181.5862 | 1204.3640 |
| 1205.4670 | 1207.9888 | 1277.3189 |
| 1285.0558 | 1301.4619 | 1330.0549 |
| 1331.2260 | 1339.5333 | 1360.2777 |
| 1360.4414 | 1364.0888 | 1410.7095 |
| 1456.3225 | 1468.1304 | 1499.7729 |
| 1506.3003 | 1518.5215 | 1554.3350 |
| 1556.8638 | 1559.7159 | 1641.8954 |
| 1669.5830 | 1672.0897 | 1678.8518 |
| 1687.4402 | 1694.9079 | 1696.8932 |
| 1699.4940 | 3200.5310 | 3204.7213 |
| 3205.3606 | 3205.8649 | 3207.8258 |
| 3209.5996 | 3214.1532 | 3223.0190 |
| 3223.6712 | 3224.8089 | 3227.0039 |
| 3230.3006 | 3232.6061 | 3236.8245 |
| 3241.3054 | 3245.5854 | 3246.5526 |

**<sup>os</sup>TS8-F**

|                                            |              |
|--------------------------------------------|--------------|
| Zero-point correction=                     | 0.641197     |
| Thermal correction to Energy=              | 0.678435     |
| Thermal correction to Enthalpy=            | 0.679379     |
| Thermal correction to Gibbs Free Energy=   | 0.571878     |
| Sum of electronic and zero-point Energies= | -1882.094573 |
| Sum of electronic and thermal Energies=    | -1882.057335 |
| Sum of electronic and thermal Enthalpies=  | -1882.056391 |

Sum of electronic and thermal Free Energies= -1882.163892

Cartesian coordinates

|   |             |             |             |
|---|-------------|-------------|-------------|
| C | 4.52858800  | -1.89323300 | 2.43489700  |
| C | 3.39191700  | -2.91555600 | 2.51143800  |
| C | 2.02699700  | -2.32549800 | 2.89157800  |
| C | 4.42831100  | -0.86105400 | 1.30901900  |
| C | 1.40169800  | -1.50628800 | 1.79983500  |
| C | 3.28423700  | 0.15230200  | 1.45331300  |
| C | 1.92980400  | -0.43146000 | 1.17213100  |
| H | 5.47177900  | -2.43705900 | 2.31550800  |
| H | 3.65415500  | -3.66757600 | 3.26315500  |
| H | 2.13619200  | -1.70331800 | 3.79008700  |
| H | 4.32961200  | -1.37361200 | 0.34382900  |
| H | 3.28600300  | 0.56580100  | 2.47085000  |
| C | -0.11115700 | -0.55495400 | 0.05269700  |
| H | 4.59696900  | -1.36431100 | 3.39572000  |
| H | 3.29872000  | -3.44108700 | 1.55283400  |
| H | 1.34350700  | -3.13585800 | 3.16146200  |
| H | 5.36715900  | -0.29908400 | 1.27428500  |
| H | 3.45880700  | 0.98838800  | 0.77307200  |
| N | 1.09602000  | 0.10549100  | 0.18446100  |
| C | 1.63669900  | 0.90020500  | -0.89916200 |
| C | 2.06911200  | 0.22653000  | -2.05301400 |
| C | 1.75080700  | 2.29038000  | -0.75460600 |
| C | 2.56564600  | 0.99832900  | -3.10687700 |
| C | 2.26773600  | 3.01528600  | -1.82905300 |
| C | 2.65900600  | 2.38036500  | -3.00224700 |
| H | 2.89059600  | 0.50653100  | -4.01913800 |
| H | 2.35728400  | 4.09473700  | -1.74571400 |
| H | 3.04821500  | 2.96237400  | -3.83159300 |
| C | 2.00727400  | -1.28659800 | -2.19705600 |
| C | 3.34385100  | -1.86946000 | -2.67178000 |
| H | 3.29998100  | -2.96215300 | -2.65206700 |
| H | 3.57019600  | -1.56699200 | -3.69879400 |
| H | 4.17155600  | -1.54566700 | -2.03479600 |
| C | 1.32590700  | 3.01796300  | 0.50761100  |
| S | -0.16795200 | -1.91740000 | 1.14303800  |
| H | 1.79617500  | -1.72258400 | -1.21414300 |
| H | 1.05292900  | 2.26398200  | 1.25293800  |
| C | 0.88063900  | -1.69281000 | -3.15577100 |
| H | 1.08718500  | -1.31564200 | -4.16322300 |
| H | 0.79882600  | -2.78272200 | -3.21136800 |
| H | -0.08388200 | -1.28956600 | -2.83516600 |

|   |             |             |             |
|---|-------------|-------------|-------------|
| C | 0.09609300  | 3.89479900  | 0.23704400  |
| H | -0.25992600 | 4.34665000  | 1.16865600  |
| H | 0.35202500  | 4.70568000  | -0.45398700 |
| H | -0.71015900 | 3.30452700  | -0.20518100 |
| C | 2.46552000  | 3.86086600  | 1.09246200  |
| H | 2.14165000  | 4.32615000  | 2.02806600  |
| H | 3.35287200  | 3.25674600  | 1.30177500  |
| H | 2.75701100  | 4.66280200  | 0.40692600  |
| C | -1.19909500 | -0.03039500 | -0.71405000 |
| O | -1.17398400 | 1.15006500  | -1.12884500 |
| C | -2.38088800 | -0.89677900 | -1.02316400 |
| C | -2.30092400 | -2.28504100 | -1.18419100 |
| C | -3.60786700 | -0.25845600 | -1.24259600 |
| C | -3.43401000 | -3.02225100 | -1.52164800 |
| H | -1.34641500 | -2.79351100 | -1.08464000 |
| C | -4.73756200 | -0.99465000 | -1.57830100 |
| H | -3.64986100 | 0.82243200  | -1.13844000 |
| C | -4.65499400 | -2.38097500 | -1.71324100 |
| H | -3.35683700 | -4.09710400 | -1.64998700 |
| H | -5.68566000 | -0.49034500 | -1.73883000 |
| H | -5.53641100 | -2.95594200 | -1.97804200 |
| C | -2.54841700 | 0.51304500  | 2.16161700  |
| C | -3.72544400 | 1.15310400  | 1.61188300  |
| C | -1.31365600 | 1.31316600  | 2.34327000  |
| H | -0.47801100 | 0.69536300  | 2.68082100  |
| H | -1.04663900 | 1.78807100  | 1.39213600  |
| H | -1.47085100 | 2.12088500  | 3.06977000  |
| H | -2.61959600 | -0.52248800 | 2.47050000  |
| O | -3.76218900 | 2.30419400  | 1.20352800  |
| O | -4.79899500 | 0.33667900  | 1.59416700  |
| C | -5.98346400 | 0.91122200  | 1.04746600  |
| H | -6.72838200 | 0.11737600  | 1.04232100  |
| H | -6.32175800 | 1.74882700  | 1.66195200  |
| H | -5.80277200 | 1.26912900  | 0.03079000  |

#### Vibrational frequencies

|          |          |          |
|----------|----------|----------|
| 25.2887  | 29.1024  | 32.7316  |
| 37.8675  | 44.5547  | 48.4523  |
| 55.1210  | 61.3695  | 67.9781  |
| 78.6904  | 83.2987  | 86.0219  |
| 90.1704  | 100.9213 | 108.7883 |
| 113.9463 | 121.6105 | 133.9251 |
| 142.2969 | 145.1988 | 164.0809 |
| 174.4771 | 183.7487 | 197.3353 |



|           |           |           |
|-----------|-----------|-----------|
| 206.5026  | 210.0341  | 218.7944  |
| 229.1589  | 234.7579  | 238.9953  |
| 244.1066  | 247.7200  | 256.9312  |
| 264.9605  | 270.7444  | 281.1292  |
| 287.7915  | 304.9185  | 320.0732  |
| 325.0411  | 338.0924  | 348.5635  |
| 362.9254  | 363.9382  | 387.3677  |
| 408.7640  | 411.1305  | 422.4337  |
| 447.5072  | 452.2563  | 467.5007  |
| 476.3839  | 486.1725  | 506.2465  |
| 523.8987  | 545.9066  | 561.4921  |
| 569.3254  | 570.7885  | 598.6308  |
| 620.9005  | 627.1092  | 645.3969  |
| 652.2659  | 665.5466  | 678.2857  |
| 687.9485  | 715.3385  | 718.6153  |
| 724.0492  | 731.1641  | 773.3131  |
| 788.6162  | 797.5591  | 815.3309  |
| 826.9755  | 828.8783  | 832.7468  |
| 880.5822  | 892.7545  | 897.5786  |
| 900.4832  | 914.2267  | 931.5412  |
| 931.8769  | 941.4978  | 944.8707  |
| 962.2867  | 964.9404  | 968.1328  |
| 973.9992  | 975.6346  | 984.4365  |
| 1002.7613 | 1005.9790 | 1007.0201 |
| 1008.6748 | 1018.6224 | 1032.4736 |
| 1052.4877 | 1063.8435 | 1070.4952 |
| 1073.5797 | 1082.7961 | 1095.9603 |
| 1097.8188 | 1114.5531 | 1118.7187 |
| 1120.6127 | 1140.5638 | 1144.0447 |
| 1158.7233 | 1160.1676 | 1168.3277 |
| 1171.3794 | 1179.4817 | 1181.8418 |
| 1184.0270 | 1186.6285 | 1197.4881 |
| 1206.8790 | 1219.6770 | 1235.7352 |
| 1241.9150 | 1246.8196 | 1258.3756 |
| 1281.4434 | 1288.1870 | 1293.7424 |
| 1302.1618 | 1313.0816 | 1321.7150 |
| 1336.8882 | 1343.4105 | 1345.3440 |
| 1346.9092 | 1357.9827 | 1372.8837 |
| 1380.8185 | 1381.3193 | 1394.7665 |
| 1396.2596 | 1400.8505 | 1403.3482 |
| 1404.0228 | 1405.5341 | 1416.0689 |
| 1420.8373 | 1422.2823 | 1454.9570 |
| 1457.2064 | 1475.1938 | 1476.8540 |
| 1480.4478 | 1482.6561 | 1485.1541 |

|           |           |           |
|-----------|-----------|-----------|
| 1488.8474 | 1489.3586 | 1490.5201 |
| 1492.2741 | 1492.8529 | 1494.5044 |
| 1495.6666 | 1499.1637 | 1502.3423 |
| 1504.2872 | 1505.3512 | 1508.5419 |
| 1512.0134 | 1515.2439 | 1522.9653 |
| 1531.0351 | 1544.0996 | 1618.4438 |
| 1673.1800 | 1677.1322 | 1680.3209 |
| 1687.6749 | 1689.5447 | 1769.5703 |
| 3047.1127 | 3048.7719 | 3054.5350 |
| 3055.8646 | 3057.5393 | 3059.4789 |
| 3061.5746 | 3061.9330 | 3064.2156 |
| 3064.7891 | 3085.3377 | 3101.0754 |
| 3102.8986 | 3104.6126 | 3112.7204 |
| 3115.3012 | 3117.3482 | 3117.4088 |
| 3130.8476 | 3138.9869 | 3142.1632 |
| 3145.4498 | 3145.9979 | 3147.5009 |
| 3148.9413 | 3154.0445 | 3158.9253 |
| 3166.6288 | 3167.4543 | 3198.6000 |
| 3201.4243 | 3206.4788 | 3209.0807 |
| 3209.8825 | 3220.0826 | 3221.1725 |
| 3222.7603 | 3240.8671 | 3254.5143 |

#### **†TS8-F**

|                                              |              |
|----------------------------------------------|--------------|
| Zero-point correction=                       | 0.641108     |
| Thermal correction to Energy=                | 0.678432     |
| Thermal correction to Enthalpy=              | 0.679376     |
| Thermal correction to Gibbs Free Energy=     | 0.570391     |
| Sum of electronic and zero-point Energies=   | -1882.094202 |
| Sum of electronic and thermal Energies=      | -1882.056878 |
| Sum of electronic and thermal Enthalpies=    | -1882.055934 |
| Sum of electronic and thermal Free Energies= | -1882.164920 |

#### Cartesian coordinates

|   |             |             |             |
|---|-------------|-------------|-------------|
| C | -4.41675100 | -1.92549700 | -2.56650300 |
| C | -3.25179100 | -2.91680500 | -2.63012900 |
| C | -1.89267400 | -2.28507600 | -2.96209300 |
| C | -4.37221400 | -0.90522700 | -1.42573600 |
| C | -1.31799500 | -1.47911500 | -1.83365900 |
| C | -3.24506700 | 0.13241700  | -1.52660000 |
| C | -1.89110600 | -0.42948100 | -1.20275300 |
| H | -5.34780500 | -2.49563500 | -2.47818400 |
| H | -3.47481900 | -3.66110900 | -3.40190900 |
| H | -1.99492500 | -1.64403100 | -3.84807800 |
| H | -4.28986800 | -1.42634200 | -0.46348900 |

|   |             |             |             |
|---|-------------|-------------|-------------|
| H | -3.21986400 | 0.54999500  | -2.54210500 |
| C | 0.09625900  | -0.55665100 | 0.00769900  |
| H | -4.47568800 | -1.38517500 | -3.52159300 |
| H | -3.17016800 | -3.45774800 | -1.67909300 |
| H | -1.18256600 | -3.07174300 | -3.23324600 |
| H | -5.32370900 | -0.36396400 | -1.41230700 |
| H | -3.45801900 | 0.96240300  | -0.84959400 |
| N | -1.11235600 | 0.09247000  | -0.16509800 |
| C | -1.69531600 | 0.89229000  | 0.88911900  |
| C | -2.16541600 | 0.23033100  | 2.03430700  |
| C | -1.80621500 | 2.28035000  | 0.72393500  |
| C | -2.70406800 | 1.01257500  | 3.05932500  |
| C | -2.36590700 | 3.01622900  | 1.76910100  |
| C | -2.79959300 | 2.39287900  | 2.93378700  |
| H | -3.06068300 | 0.53108100  | 3.96526100  |
| H | -2.45479600 | 4.09441400  | 1.67056300  |
| H | -3.22284000 | 2.98283300  | 3.74055800  |
| C | -2.09764600 | -1.28019600 | 2.19790400  |
| C | -3.44732000 | -1.86914300 | 2.62477700  |
| H | -3.39330400 | -2.96155800 | 2.62277700  |
| H | -3.71919600 | -1.55428100 | 3.63690600  |
| H | -4.25010300 | -1.56189800 | 1.94882300  |
| C | -1.32421800 | 2.99262500  | -0.52701400 |
| S | 0.22926300  | -1.88247100 | -1.12135900 |
| H | -1.84296400 | -1.72411400 | 1.22885700  |
| H | -1.03917300 | 2.23037600  | -1.25979600 |
| C | -1.00631200 | -1.66559500 | 3.20492000  |
| H | -1.25855000 | -1.28462000 | 4.20051600  |
| H | -0.91327000 | -2.75395900 | 3.27184300  |
| H | -0.03492600 | -1.25129000 | 2.92123400  |
| C | -0.08552400 | 3.84306800  | -0.21520000 |
| H | 0.31320700  | 4.28503200  | -1.13406200 |
| H | -0.34761900 | 4.65986900  | 0.46653800  |
| H | 0.69142800  | 3.23588400  | 0.25601000  |
| C | -2.42470100 | 3.85410200  | -1.15683800 |
| H | -2.06009500 | 4.30224800  | -2.08576000 |
| H | -3.31733400 | 3.26620900  | -1.38924100 |
| H | -2.72114900 | 4.66965700  | -0.48983100 |
| C | 1.14771100  | -0.05241800 | 0.83143300  |
| O | 1.10404100  | 1.10516900  | 1.30576500  |
| C | 2.33819200  | -0.91905000 | 1.10446400  |
| C | 2.25196200  | -2.30588100 | 1.27274500  |
| C | 3.57733100  | -0.28912000 | 1.27334500  |
| C | 3.39035300  | -3.05184100 | 1.57001000  |

|   |            |             |             |
|---|------------|-------------|-------------|
| H | 1.28869500 | -2.80387100 | 1.20685600  |
| C | 4.71328100 | -1.03516800 | 1.56521700  |
| H | 3.62589500 | 0.79131600  | 1.16682100  |
| C | 4.62344800 | -2.41995000 | 1.70952400  |
| H | 3.30943300 | -4.12541500 | 1.70639600  |
| H | 5.67179400 | -0.54013100 | 1.68782900  |
| H | 5.50978000 | -3.00126200 | 1.94217300  |
| C | 2.65042200 | 0.55370800  | -2.19432900 |
| C | 3.79100700 | 1.19172000  | -1.56852500 |
| C | 1.37730800 | 1.30615600  | -2.29921300 |
| H | 0.57606800 | 0.69353800  | -2.71826200 |
| H | 1.07697000 | 1.66007700  | -1.30617000 |
| H | 1.50125700 | 2.19979900  | -2.92499800 |
| H | 2.77509400 | -0.43812500 | -2.61039000 |
| O | 3.77470600 | 2.31069700  | -1.07768700 |
| O | 4.89246800 | 0.41446100  | -1.58201300 |
| C | 6.04643300 | 0.99352600  | -0.97654000 |
| H | 6.81736400 | 0.22543700  | -1.00334300 |
| H | 6.36804600 | 1.87661700  | -1.53349200 |
| H | 5.83373100 | 1.28454600  | 0.05501400  |

#### Vibrational frequencies

|          |          |          |
|----------|----------|----------|
| 21.6460  | 28.3172  | 30.3243  |
| 36.2089  | 45.0257  | 48.6889  |
| 49.9583  | 66.6264  | 69.4030  |
| 78.4711  | 83.7418  | 91.2046  |
| 96.3824  | 100.4871 | 104.0829 |
| 111.6646 | 120.2161 | 127.5232 |
| 133.6287 | 143.8366 | 163.0098 |
| 171.1998 | 187.4781 | 201.1884 |
| 203.5593 | 206.6179 | 218.7926 |
| 225.5320 | 231.0584 | 239.6289 |
| 242.7881 | 247.9587 | 253.9681 |
| 265.1442 | 270.2218 | 280.8141 |
| 287.3534 | 300.0611 | 319.6502 |
| 324.8513 | 334.4684 | 345.7581 |
| 361.5199 | 363.7361 | 389.3697 |
| 409.1475 | 410.2976 | 423.5739 |
| 447.4663 | 451.3068 | 468.8509 |
| 474.6397 | 485.3908 | 506.5198 |
| 524.4174 | 546.2725 | 548.7869 |
| 560.6764 | 569.3464 | 598.9067 |
| 619.6272 | 627.1438 | 645.4169 |
| 653.1587 | 668.3202 | 681.7931 |

|           |           |           |
|-----------|-----------|-----------|
| 686.0675  | 714.8967  | 718.7537  |
| 724.3843  | 729.9614  | 772.2382  |
| 789.0784  | 797.5298  | 816.0376  |
| 827.5007  | 829.7826  | 832.9176  |
| 885.2793  | 893.4695  | 896.9708  |
| 899.9764  | 914.1582  | 928.1361  |
| 932.3584  | 942.2637  | 944.1629  |
| 962.4510  | 964.9032  | 968.0710  |
| 973.2671  | 976.1530  | 985.0180  |
| 997.5049  | 1002.6808 | 1009.0326 |
| 1011.4148 | 1018.6675 | 1034.5265 |
| 1050.7672 | 1062.8450 | 1070.1104 |
| 1073.1320 | 1082.3526 | 1094.8144 |
| 1095.4139 | 1113.7649 | 1117.8284 |
| 1119.9355 | 1140.8356 | 1143.8919 |
| 1157.5880 | 1160.1917 | 1168.8315 |
| 1172.2336 | 1179.5183 | 1181.5112 |
| 1185.7185 | 1186.0401 | 1197.5644 |
| 1207.1362 | 1220.7321 | 1235.5623 |
| 1243.7543 | 1247.7417 | 1260.2526 |
| 1281.8648 | 1287.8540 | 1294.6978 |
| 1302.6620 | 1313.4957 | 1322.7033 |
| 1336.9335 | 1340.0369 | 1347.6354 |
| 1349.4520 | 1357.3237 | 1373.3668 |
| 1379.7778 | 1382.8540 | 1392.8924 |
| 1395.7473 | 1399.6667 | 1403.1090 |
| 1404.6000 | 1405.2769 | 1417.8967 |
| 1422.0179 | 1423.1733 | 1455.2942 |
| 1464.6216 | 1470.2316 | 1476.9692 |
| 1480.7891 | 1481.1237 | 1483.6611 |
| 1488.4503 | 1488.8159 | 1491.9568 |
| 1492.7098 | 1493.4898 | 1494.9835 |
| 1495.7392 | 1499.5574 | 1504.1678 |
| 1505.0889 | 1505.8578 | 1508.6862 |
| 1512.9845 | 1517.8443 | 1522.5051 |
| 1529.6778 | 1544.3750 | 1621.5205 |
| 1672.3893 | 1676.9692 | 1680.7684 |
| 1687.8757 | 1689.2614 | 1764.5925 |
| 3044.5913 | 3048.8017 | 3054.9842 |
| 3056.2010 | 3057.9519 | 3058.3003 |
| 3061.9208 | 3062.1445 | 3064.5360 |
| 3064.8022 | 3091.4826 | 3094.0127 |
| 3101.0746 | 3104.0923 | 3112.5786 |
| 3114.3040 | 3114.5626 | 3119.1896 |

|           |           |           |
|-----------|-----------|-----------|
| 3131.8354 | 3137.8309 | 3143.2883 |
| 3143.7762 | 3145.8088 | 3146.6201 |
| 3151.7127 | 3152.7991 | 3159.3304 |
| 3168.1070 | 3174.3004 | 3199.5637 |
| 3203.1541 | 3205.0850 | 3209.7114 |
| 3211.1747 | 3219.0153 | 3221.6010 |
| 3223.8907 | 3237.3569 | 3270.5516 |

**<sup>0s</sup>TS5**

|                                              |          |              |
|----------------------------------------------|----------|--------------|
| Zero-point correction=                       | 0.640892 |              |
| Thermal correction to Energy=                | 0.677064 |              |
| Thermal correction to Enthalpy=              | 0.678008 |              |
| Thermal correction to Gibbs Free Energy=     |          | 0.573394     |
| Sum of electronic and zero-point Energies=   |          | -1882.090824 |
| Sum of electronic and thermal Energies=      |          | -1882.054652 |
| Sum of electronic and thermal Enthalpies=    |          | -1882.053708 |
| Sum of electronic and thermal Free Energies= |          | -1882.158323 |

Cartesian coordinates

|   |           |           |           |
|---|-----------|-----------|-----------|
| C | -4.765174 | -2.173386 | -1.731154 |
| C | -3.621473 | -3.177197 | -1.894272 |
| C | -2.353915 | -2.599433 | -2.536770 |
| C | -4.530874 | -1.050856 | -0.718094 |
| C | -1.599120 | -1.663986 | -1.637964 |
| C | -3.461406 | -0.023522 | -1.116311 |
| C | -2.057854 | -0.549848 | -1.023209 |
| H | -5.661983 | -2.723913 | -1.427897 |
| H | -3.969917 | -3.999719 | -2.527180 |
| H | -2.620681 | -2.066342 | -3.458728 |
| H | -4.267105 | -1.480298 | 0.256472  |
| H | -3.640494 | 0.312648  | -2.146575 |
| C | 0.150096  | -0.506788 | -0.283507 |
| H | -4.992023 | -1.728425 | -2.709764 |
| H | -3.363069 | -3.610972 | -0.920315 |
| H | -1.691096 | -3.416934 | -2.834044 |
| H | -5.472220 | -0.509541 | -0.580864 |
| H | -3.554651 | 0.856950  | -0.478156 |
| N | -1.078028 | 0.090468  | -0.249084 |
| C | -1.486803 | 0.973094  | 0.835090  |
| C | -1.741474 | 0.378344  | 2.080591  |
| C | -1.690832 | 2.338220  | 0.593926  |
| C | -2.154662 | 1.213992  | 3.122229  |
| C | -2.118471 | 3.126080  | 1.663452  |
| C | -2.337990 | 2.575319  | 2.920900  |

|   |           |           |           |
|---|-----------|-----------|-----------|
| H | -2.340491 | 0.786720  | 4.103101  |
| H | -2.276765 | 4.189392  | 1.507643  |
| H | -2.661409 | 3.206811  | 3.742043  |
| C | -1.568888 | -1.109659 | 2.345890  |
| C | -2.800089 | -1.716389 | 3.029341  |
| H | -2.690831 | -2.802649 | 3.093325  |
| H | -2.918490 | -1.336571 | 4.048443  |
| H | -3.717382 | -1.492780 | 2.477976  |
| C | -1.454483 | 2.978849  | -0.760198 |
| S | 0.074448  | -1.941257 | -1.250632 |
| H | -1.445757 | -1.627461 | 1.388046  |
| H | -1.187420 | 2.185784  | -1.465076 |
| C | -0.314179 | -1.359248 | 3.192937  |
| H | -0.435550 | -0.911865 | 4.185289  |
| H | -0.146249 | -2.432858 | 3.321997  |
| H | 0.576950  | -0.923677 | 2.733533  |
| C | -0.284827 | 3.968796  | -0.685749 |
| H | -0.052403 | 4.356483  | -1.682856 |
| H | -0.545063 | 4.819690  | -0.047175 |
| H | 0.604333  | 3.484880  | -0.274762 |
| C | -2.713506 | 3.675534  | -1.290228 |
| H | -2.518879 | 4.091151  | -2.283244 |
| H | -3.558039 | 2.985394  | -1.370209 |
| H | -3.012880 | 4.501636  | -0.637538 |
| C | 1.314450  | 0.111453  | 0.354486  |
| O | 1.230211  | 1.311435  | 0.684320  |
| C | 2.479683  | -0.709854 | 0.816657  |
| C | 2.496477  | -2.107404 | 0.896628  |
| C | 3.593005  | 0.002062  | 1.281980  |
| C | 3.616454  | -2.773676 | 1.388625  |
| H | 1.627599  | -2.692885 | 0.617227  |
| C | 4.706405  | -0.663537 | 1.778559  |
| H | 3.565575  | 1.085502  | 1.226892  |
| C | 4.727234  | -2.057207 | 1.826060  |
| H | 3.610514  | -3.857501 | 1.444752  |
| H | 5.563008  | -0.094787 | 2.127983  |
| H | 5.596764  | -2.579179 | 2.212392  |
| C | 2.241144  | 0.326550  | -2.126720 |
| C | 3.481274  | 0.914315  | -1.699690 |
| C | 1.147074  | 1.231793  | -2.563720 |
| H | 0.237134  | 0.675822  | -2.810050 |
| H | 0.929674  | 1.938213  | -1.754389 |
| H | 1.429780  | 1.826327  | -3.442948 |
| H | 2.249570  | -0.725352 | -2.388700 |

|   |          |           |           |
|---|----------|-----------|-----------|
| O | 3.643931 | 2.095274  | -1.413920 |
| O | 4.494349 | 0.012083  | -1.627702 |
| C | 5.755759 | 0.553146  | -1.252579 |
| H | 6.437511 | -0.293271 | -1.178441 |
| H | 6.110891 | 1.259543  | -2.007984 |
| H | 5.690417 | 1.067187  | -0.291224 |

Vibrational frequencies

|           |           |           |
|-----------|-----------|-----------|
| -540.1294 | 22.6216   | 24.8320   |
| 33.4452   | 39.4682   | 41.8149   |
| 47.8250   | 57.9078   | 77.2781   |
| 81.0047   | 89.2678   | 96.5712   |
| 99.9924   | 109.1022  | 114.2467  |
| 118.2266  | 124.1924  | 134.0677  |
| 140.6843  | 151.1258  | 163.0495  |
| 180.1898  | 195.8566  | 204.1831  |
| 213.1715  | 218.5812  | 224.1181  |
| 228.5656  | 234.6619  | 239.6054  |
| 243.9470  | 251.0945  | 260.3375  |
| 273.9227  | 282.0789  | 286.1773  |
| 293.9796  | 305.9189  | 323.6677  |
| 327.5192  | 338.7228  | 349.9955  |
| 365.1887  | 376.4396  | 381.8184  |
| 411.3877  | 418.4512  | 421.2661  |
| 439.1518  | 454.1762  | 464.9472  |
| 480.1298  | 493.0500  | 505.3524  |
| 513.4677  | 532.5590  | 556.5423  |
| 567.6206  | 590.3795  | 609.0710  |
| 627.9583  | 636.0015  | 651.1804  |
| 654.0945  | 660.7171  | 682.1123  |
| 702.5572  | 708.1543  | 720.3897  |
| 727.1483  | 739.3328  | 778.1137  |
| 787.6386  | 792.8988  | 817.5962  |
| 830.0421  | 831.7022  | 835.8574  |
| 872.6016  | 891.3669  | 896.1231  |
| 899.0035  | 913.4665  | 933.3781  |
| 935.3934  | 942.7667  | 945.9343  |
| 948.0451  | 957.7655  | 966.1876  |
| 968.2375  | 973.4828  | 974.4104  |
| 990.0857  | 1002.7733 | 1009.7250 |
| 1016.6093 | 1017.7660 | 1021.3072 |
| 1049.6099 | 1065.8117 | 1071.7091 |
| 1074.2744 | 1083.5474 | 1087.5610 |
| 1099.0061 | 1107.4841 | 1119.0355 |



|           |           |           |
|-----------|-----------|-----------|
| 1123.8707 | 1129.6147 | 1141.5279 |
| 1143.7624 | 1165.9725 | 1166.8333 |
| 1173.4589 | 1174.1751 | 1183.0205 |
| 1184.7702 | 1188.4246 | 1191.9445 |
| 1206.1852 | 1210.7550 | 1218.6068 |
| 1239.3372 | 1242.7403 | 1253.1665 |
| 1282.7452 | 1288.3788 | 1293.1138 |
| 1298.7048 | 1304.7343 | 1316.6444 |
| 1325.0858 | 1335.5334 | 1337.5012 |
| 1343.6100 | 1347.0030 | 1361.5830 |
| 1371.9310 | 1377.0936 | 1382.5932 |
| 1396.0513 | 1396.9429 | 1401.6377 |
| 1404.0731 | 1405.3132 | 1408.1348 |
| 1414.6663 | 1423.1752 | 1427.5779 |
| 1450.7906 | 1475.6022 | 1480.4003 |
| 1482.0677 | 1483.3189 | 1485.2867 |
| 1487.5281 | 1489.8040 | 1492.0657 |
| 1493.3482 | 1494.1909 | 1495.7022 |
| 1497.1917 | 1498.3138 | 1499.4606 |
| 1503.7250 | 1507.3132 | 1509.3051 |
| 1511.9927 | 1515.5361 | 1523.0414 |
| 1530.8992 | 1544.0228 | 1594.5938 |
| 1669.7145 | 1675.1159 | 1681.4933 |
| 1687.7409 | 1690.9414 | 1736.7574 |
| 3038.5662 | 3053.3095 | 3058.7460 |
| 3059.3138 | 3059.8367 | 3063.5281 |
| 3064.1448 | 3065.5277 | 3066.6201 |
| 3068.7990 | 3080.4297 | 3091.6497 |
| 3105.1069 | 3110.9632 | 3111.0139 |
| 3114.8955 | 3116.7894 | 3122.1205 |
| 3135.9460 | 3144.0554 | 3144.9891 |
| 3146.0207 | 3149.1030 | 3149.7019 |
| 3153.0905 | 3154.7301 | 3158.7692 |
| 3161.1622 | 3167.5273 | 3192.6084 |
| 3200.7719 | 3204.5302 | 3210.6490 |
| 3215.0127 | 3220.8296 | 3227.5950 |
| 3230.3561 | 3243.2089 | 3245.8836 |

## M8

|                                            |          |              |
|--------------------------------------------|----------|--------------|
| Zero-point correction=                     | 0.645593 |              |
| Thermal correction to Energy=              | 0.680895 |              |
| Thermal correction to Enthalpy=            | 0.681839 |              |
| Thermal correction to Gibbs Free Energy=   |          | 0.580995     |
| Sum of electronic and zero-point Energies= |          | -1882.125126 |

|                                              |              |
|----------------------------------------------|--------------|
| Sum of electronic and thermal Energies=      | -1882.089824 |
| Sum of electronic and thermal Enthalpies=    | -1882.088880 |
| Sum of electronic and thermal Free Energies= | -1882.189723 |

Cartesian coordinates

|   |          |           |           |
|---|----------|-----------|-----------|
| C | 5.228294 | -1.635149 | -1.170640 |
| C | 4.273927 | -2.750701 | -1.603518 |
| C | 3.062540 | -2.274190 | -2.418040 |
| C | 4.671948 | -0.629077 | -0.159156 |
| C | 2.052321 | -1.535466 | -1.589680 |
| C | 3.571515 | 0.294366  | -0.711035 |
| C | 2.253509 | -0.407935 | -0.863551 |
| H | 6.118621 | -2.099152 | -0.733587 |
| H | 4.831581 | -3.460923 | -2.222210 |
| H | 3.400681 | -1.614991 | -3.227644 |
| H | 4.293703 | -1.159815 | 0.723602  |
| H | 3.890129 | 0.675736  | -1.689438 |
| C | 0.036947 | -0.808049 | -0.325431 |
| H | 5.569191 | -1.091361 | -2.062283 |
| H | 3.920415 | -3.302721 | -0.724372 |
| H | 2.577465 | -3.130446 | -2.893824 |
| H | 5.495702 | 0.006487  | 0.182094  |
| H | 3.444400 | 1.164690  | -0.061962 |
| N | 1.094835 | -0.010700 | -0.177675 |
| C | 1.037240 | 1.258068  | 0.533676  |
| C | 1.499630 | 1.314996  | 1.853643  |
| C | 0.586056 | 2.373970  | -0.181118 |
| C | 1.437833 | 2.552556  | 2.492477  |
| C | 0.544871 | 3.590318  | 0.507768  |
| C | 0.951968 | 3.677361  | 1.832833  |
| H | 1.774923 | 2.636042  | 3.521738  |
| H | 0.200163 | 4.481681  | -0.006315 |
| H | 0.907901 | 4.630583  | 2.350044  |
| C | 2.070129 | 0.110519  | 2.580210  |
| C | 3.506407 | 0.388664  | 3.044054  |
| H | 3.516581 | 1.147582  | 3.832977  |
| H | 4.142451 | 0.746680  | 2.228996  |
| H | 3.952990 | -0.522470 | 3.453431  |
| C | 0.252067 | 2.323452  | -1.664650 |
| S | 0.430999 | -2.094579 | -1.374415 |
| H | 2.091448 | -0.735052 | 1.881752  |
| H | 0.016654 | 1.289341  | -1.936743 |
| C | 1.191381 | -0.297700 | 3.768161  |
| H | 1.148047 | 0.509764  | 4.507685  |

|   |           |           |           |
|---|-----------|-----------|-----------|
| H | 1.617081  | -1.178212 | 4.260353  |
| H | 0.184472  | -0.517070 | 3.409310  |
| C | -0.964360 | 3.174743  | -2.032560 |
| H | -1.822883 | 2.932941  | -1.402840 |
| H | -1.239811 | 2.987434  | -3.074432 |
| H | -0.745813 | 4.243415  | -1.939149 |
| C | 1.471831  | 2.766875  | -2.485136 |
| H | 1.735113  | 3.801474  | -2.240936 |
| H | 1.249515  | 2.713281  | -3.554941 |
| H | 2.345552  | 2.141533  | -2.285697 |
| C | -1.316242 | -0.627729 | 0.476767  |
| O | -1.081641 | -0.120114 | 1.658880  |
| C | -2.277612 | 0.218929  | -0.409667 |
| C | -2.504420 | 0.003468  | -1.771542 |
| C | -3.044245 | 1.171612  | 0.259367  |
| C | -3.489798 | 0.719734  | -2.447336 |
| H | -1.923218 | -0.737593 | -2.316635 |
| C | -4.045191 | 1.876761  | -0.408820 |
| H | -2.831193 | 1.325428  | 1.311943  |
| C | -4.272511 | 1.650653  | -1.764854 |
| H | -3.654120 | 0.543717  | -3.506230 |
| H | -4.643146 | 2.607970  | 0.127723  |
| H | -5.048336 | 2.199557  | -2.289537 |
| C | -1.944631 | -2.109894 | 0.569772  |
| C | -1.175095 | -2.932387 | 1.595510  |
| H | -1.599782 | -3.934340 | 1.700203  |
| H | -0.122770 | -3.034397 | 1.315539  |
| C | -3.378758 | -1.960904 | 1.014185  |
| O | -3.745566 | -1.801916 | 2.157378  |
| O | -4.236574 | -2.009650 | -0.018648 |
| C | -5.595624 | -1.715275 | 0.305117  |
| H | -5.669476 | -0.705933 | 0.717703  |
| H | -5.983391 | -2.431496 | 1.032047  |
| H | -6.147812 | -1.783432 | -0.630373 |
| H | -1.227076 | -2.413024 | 2.552344  |
| H | -1.967096 | -2.586838 | -0.417690 |

Vibrational frequencies

|          |          |          |
|----------|----------|----------|
| 27.0737  | 41.2518  | 41.9613  |
| 49.7473  | 59.0735  | 70.2631  |
| 79.4209  | 81.5806  | 88.4480  |
| 90.4409  | 94.3018  | 101.2870 |
| 122.1914 | 123.6786 | 129.0910 |
| 133.3049 | 139.0291 | 147.1089 |

|           |           |           |
|-----------|-----------|-----------|
| 162.8248  | 173.1971  | 190.1237  |
| 206.0650  | 212.2683  | 215.9941  |
| 225.4625  | 236.8913  | 241.9449  |
| 247.1226  | 250.0254  | 254.9194  |
| 268.8471  | 282.1585  | 284.5730  |
| 294.5546  | 298.8485  | 300.1245  |
| 311.3767  | 319.7360  | 336.6223  |
| 348.9675  | 355.7551  | 357.8748  |
| 368.4132  | 406.8998  | 415.3658  |
| 420.6580  | 424.7186  | 434.7865  |
| 449.3773  | 475.9349  | 490.7604  |
| 510.5220  | 527.2504  | 534.9166  |
| 549.1780  | 566.3930  | 585.0685  |
| 615.1015  | 621.8487  | 629.0310  |
| 637.0992  | 653.1138  | 668.7102  |
| 687.1035  | 710.0861  | 723.0843  |
| 729.7422  | 736.4646  | 767.8910  |
| 780.9111  | 790.1311  | 803.2654  |
| 822.4860  | 829.2955  | 834.2154  |
| 836.5432  | 877.0161  | 883.4649  |
| 891.5702  | 897.1758  | 914.2340  |
| 916.6535  | 921.9048  | 931.2246  |
| 933.8580  | 938.5859  | 956.1243  |
| 962.1502  | 968.5828  | 973.8054  |
| 974.5969  | 978.3838  | 1001.6326 |
| 1006.9076 | 1011.1950 | 1013.6536 |
| 1015.9579 | 1021.3042 | 1052.4348 |
| 1055.6208 | 1067.3130 | 1073.0589 |
| 1084.4522 | 1088.1562 | 1099.7837 |
| 1107.5420 | 1118.5753 | 1124.6203 |
| 1135.3906 | 1143.5331 | 1145.3226 |
| 1148.7592 | 1168.3407 | 1172.2471 |
| 1173.0800 | 1177.2202 | 1183.3970 |
| 1189.7477 | 1190.0110 | 1200.7243 |
| 1209.5414 | 1216.5193 | 1235.8895 |
| 1238.5088 | 1252.3857 | 1255.6129 |
| 1258.0599 | 1289.1952 | 1293.0654 |
| 1299.7228 | 1307.7080 | 1322.1792 |
| 1329.6327 | 1336.9397 | 1338.8237 |
| 1340.3664 | 1343.8881 | 1363.1798 |
| 1373.0877 | 1377.0645 | 1384.7971 |
| 1391.3101 | 1392.4526 | 1398.2916 |
| 1400.7936 | 1405.5280 | 1406.7837 |
| 1408.3064 | 1416.6486 | 1419.9310 |

|           |           |           |
|-----------|-----------|-----------|
| 1425.1964 | 1478.1819 | 1480.5540 |
| 1483.8271 | 1485.5666 | 1485.9136 |
| 1488.6527 | 1489.8055 | 1491.8868 |
| 1492.7303 | 1495.1919 | 1496.4009 |
| 1496.6676 | 1497.4157 | 1498.9713 |
| 1501.1306 | 1504.8228 | 1507.4912 |
| 1508.9301 | 1514.1559 | 1518.8906 |
| 1525.9225 | 1533.8159 | 1540.4930 |
| 1675.4107 | 1676.2290 | 1685.5385 |
| 1688.0044 | 1688.7804 | 1841.7810 |
| 3051.4715 | 3055.0040 | 3060.6918 |
| 3063.8121 | 3066.2629 | 3067.8523 |
| 3069.0294 | 3069.5488 | 3072.6377 |
| 3075.5511 | 3078.6110 | 3082.0504 |
| 3086.7536 | 3108.6042 | 3111.8136 |
| 3119.5501 | 3121.3931 | 3127.6251 |
| 3132.0483 | 3140.0220 | 3140.2510 |
| 3140.6521 | 3147.4210 | 3148.3263 |
| 3148.3417 | 3165.5835 | 3171.1877 |
| 3176.6584 | 3180.4510 | 3187.7304 |
| 3191.8445 | 3194.9625 | 3199.2671 |
| 3202.4559 | 3208.1218 | 3211.5527 |
| 3224.1285 | 3227.1418 | 3230.3935 |

### TS6

|                                              |              |              |
|----------------------------------------------|--------------|--------------|
| Zero-point correction=                       | 0.644871     |              |
| Thermal correction to Energy=                | 0.679992     |              |
| Thermal correction to Enthalpy=              | 0.680936     |              |
| Thermal correction to Gibbs Free Energy=     |              | 0.580339     |
| Sum of electronic and zero-point Energies=   |              | -1882.114088 |
| Sum of electronic and thermal Energies=      | -1882.078967 |              |
| Sum of electronic and thermal Enthalpies=    |              | -1882.078023 |
| Sum of electronic and thermal Free Energies= |              | -1882.178620 |

### Cartesian coordinates

|   |           |           |           |
|---|-----------|-----------|-----------|
| C | -5.058107 | -1.998053 | -1.161167 |
| C | -4.074491 | -3.169035 | -1.106061 |
| C | -2.754690 | -2.926148 | -1.850008 |
| C | -4.633402 | -0.728208 | -0.417641 |
| C | -1.851805 | -1.943400 | -1.162580 |
| C | -3.451181 | 0.025263  | -1.049733 |
| C | -2.133519 | -0.662492 | -0.831430 |
| H | -6.012741 | -2.334092 | -0.742285 |
| H | -4.555338 | -4.045073 | -1.553609 |

|   |           |           |           |
|---|-----------|-----------|-----------|
| H | -2.971594 | -2.560167 | -2.862452 |
| H | -4.393743 | -0.973483 | 0.624693  |
| H | -3.634267 | 0.119117  | -2.128403 |
| C | 0.061548  | -0.784988 | 0.016524  |
| H | -5.254538 | -1.746601 | -2.212606 |
| H | -3.856135 | -3.423945 | -0.061924 |
| H | -2.222373 | -3.874058 | -1.969714 |
| H | -5.488613 | -0.044114 | -0.393107 |
| H | -3.398135 | 1.043781  | -0.656361 |
| N | -1.036585 | -0.045233 | -0.190478 |
| C | -1.065390 | 1.374684  | 0.116619  |
| C | -1.717405 | 1.811470  | 1.275756  |
| C | -0.464230 | 2.250176  | -0.800392 |
| C | -1.724823 | 3.184219  | 1.530900  |
| C | -0.492526 | 3.612953  | -0.494106 |
| C | -1.108902 | 4.076571  | 0.662501  |
| H | -2.214036 | 3.555609  | 2.426910  |
| H | -0.032979 | 4.321938  | -1.174469 |
| H | -1.118142 | 5.139703  | 0.881305  |
| C | -2.409808 | 0.866342  | 2.242387  |
| C | -3.894402 | 1.225356  | 2.395079  |
| H | -4.007224 | 2.190246  | 2.899592  |
| H | -4.404602 | 1.291084  | 1.430170  |
| H | -4.404504 | 0.470880  | 3.001779  |
| C | 0.119656  | 1.768372  | -2.120776 |
| S | -0.248290 | -2.340763 | -0.636289 |
| H | -2.340853 | -0.151527 | 1.839546  |
| H | 0.498265  | 0.751710  | -1.978171 |
| C | -1.723318 | 0.876499  | 3.614173  |
| H | -1.847630 | 1.853690  | 4.094225  |
| H | -2.176587 | 0.124717  | 4.268067  |
| H | -0.656123 | 0.677226  | 3.504273  |
| C | 1.291375  | 2.623980  | -2.602896 |
| H | 2.032477  | 2.764726  | -1.812567 |
| H | 1.782343  | 2.130440  | -3.446351 |
| H | 0.953748  | 3.606415  | -2.949389 |
| C | -0.974968 | 1.724321  | -3.196287 |
| H | -1.407159 | 2.720342  | -3.339333 |
| H | -0.554449 | 1.392929  | -4.150514 |
| H | -1.781803 | 1.038863  | -2.926247 |
| C | 1.583257  | -0.002441 | 1.228110  |
| O | 1.033641  | 0.808142  | 1.993889  |
| C | 2.538736  | 0.538782  | 0.166374  |
| C | 2.864640  | -0.123054 | -1.021935 |

|   |          |           |           |
|---|----------|-----------|-----------|
| C | 3.223376 | 1.710686  | 0.492637  |
| C | 3.866351 | 0.367019  | -1.853941 |
| H | 2.332690 | -1.029648 | -1.298445 |
| C | 4.234126 | 2.199802  | -0.335311 |
| H | 2.958175 | 2.222963  | 1.411955  |
| C | 4.562244 | 1.525749  | -1.508325 |
| H | 4.104737 | -0.157533 | -2.774363 |
| H | 4.764770 | 3.106835  | -0.062316 |
| H | 5.347677 | 1.903173  | -2.155423 |
| C | 2.103288 | -1.308136 | 1.932000  |
| H | 2.844571 | -0.888403 | 2.621799  |
| C | 1.015504 | -2.023578 | 2.723776  |
| H | 0.425750 | -2.673608 | 2.075968  |
| H | 0.358255 | -1.277065 | 3.174752  |
| C | 2.851848 | -2.247528 | 1.022337  |
| O | 2.349419 | -3.121706 | 0.346261  |
| O | 4.167378 | -2.001276 | 1.019885  |
| C | 4.934964 | -2.762057 | 0.083813  |
| H | 4.793429 | -3.830763 | 0.251838  |
| H | 4.631348 | -2.510598 | -0.935705 |
| H | 5.972771 | -2.480998 | 0.250401  |
| H | 1.450136 | -2.635908 | 3.517767  |

#### Vibrational frequencies

|           |          |          |
|-----------|----------|----------|
| -125.2070 | 32.3237  | 40.3404  |
| 42.6820   | 51.4962  | 58.0251  |
| 62.3729   | 73.5981  | 80.0396  |
| 82.0614   | 94.3620  | 101.5886 |
| 115.6889  | 118.2751 | 122.7612 |
| 124.6680  | 128.6938 | 139.1038 |
| 149.5111  | 152.0183 | 161.5685 |
| 172.7182  | 186.5218 | 208.5654 |
| 223.3085  | 229.3353 | 232.8384 |
| 239.0553  | 245.7787 | 246.6641 |
| 263.3994  | 280.9410 | 283.1401 |
| 292.8303  | 303.2419 | 305.8098 |
| 315.7569  | 323.5886 | 336.3771 |
| 338.5255  | 351.9827 | 357.8998 |
| 366.4716  | 390.6997 | 403.6676 |
| 410.7319  | 425.5201 | 426.7124 |
| 449.5056  | 470.8104 | 476.7009 |
| 501.6981  | 519.7808 | 529.3657 |
| 534.4818  | 552.4096 | 566.0497 |
| 582.9239  | 614.5682 | 623.9536 |

|           |           |           |
|-----------|-----------|-----------|
| 628.9121  | 650.2839  | 653.5388  |
| 670.0820  | 696.9722  | 717.9661  |
| 720.4457  | 731.4523  | 758.8256  |
| 780.3370  | 781.9497  | 791.4361  |
| 811.6254  | 813.8157  | 830.0190  |
| 832.7097  | 836.5675  | 869.1535  |
| 880.3405  | 895.5458  | 898.6907  |
| 916.1521  | 931.2772  | 932.8550  |
| 935.9645  | 942.0929  | 946.1893  |
| 968.0305  | 971.7998  | 975.1792  |
| 975.4316  | 977.7357  | 989.1721  |
| 1005.8659 | 1012.0382 | 1016.1358 |
| 1018.9107 | 1022.9430 | 1045.8461 |
| 1058.4667 | 1063.4754 | 1071.2497 |
| 1077.4592 | 1087.1509 | 1094.5588 |
| 1115.9625 | 1121.5185 | 1125.0748 |
| 1127.5997 | 1137.1093 | 1150.3775 |
| 1151.3538 | 1161.7469 | 1170.3060 |
| 1176.2308 | 1182.1671 | 1187.5053 |
| 1192.2058 | 1200.4323 | 1212.2052 |
| 1215.5695 | 1232.8527 | 1234.9372 |
| 1247.2063 | 1255.4400 | 1257.3897 |
| 1285.3612 | 1292.9759 | 1297.4683 |
| 1298.7473 | 1304.4585 | 1321.4011 |
| 1330.7834 | 1334.4351 | 1336.9765 |
| 1344.7183 | 1361.2549 | 1371.8056 |
| 1376.4014 | 1382.4702 | 1395.1916 |
| 1396.7191 | 1398.1486 | 1401.7360 |
| 1405.1344 | 1405.8808 | 1410.6685 |
| 1412.9803 | 1423.7564 | 1424.3132 |
| 1426.8574 | 1477.6002 | 1483.1208 |
| 1484.6190 | 1486.7741 | 1488.1512 |
| 1489.0966 | 1492.8580 | 1493.5651 |
| 1495.5650 | 1495.9386 | 1497.0565 |
| 1498.0134 | 1501.4649 | 1503.4186 |
| 1504.2826 | 1506.9929 | 1507.6507 |
| 1514.0280 | 1520.0072 | 1527.2094 |
| 1536.1173 | 1546.3239 | 1631.0995 |
| 1676.5613 | 1678.3314 | 1687.5336 |
| 1694.1489 | 1694.9280 | 1829.8659 |
| 3053.8174 | 3057.8763 | 3060.5794 |
| 3061.5898 | 3062.5874 | 3067.1794 |
| 3068.1248 | 3069.4129 | 3070.4626 |
| 3079.2138 | 3083.5398 | 3088.6179 |



|           |           |           |
|-----------|-----------|-----------|
| 3095.7606 | 3108.7809 | 3116.4962 |
| 3117.1628 | 3119.1105 | 3121.0851 |
| 3133.5762 | 3136.2835 | 3139.9538 |
| 3142.4944 | 3149.0694 | 3152.4853 |
| 3160.7109 | 3162.9791 | 3175.1018 |
| 3180.0897 | 3180.8554 | 3187.4867 |
| 3197.8698 | 3197.9873 | 3206.5073 |
| 3209.0850 | 3213.2677 | 3217.7907 |
| 3219.4466 | 3226.0258 | 3234.7021 |

## P

|                                              |             |             |
|----------------------------------------------|-------------|-------------|
| Zero-point correction=                       | 0.212314    |             |
| Thermal correction to Energy=                | 0.225666    |             |
| Thermal correction to Enthalpy=              | 0.226610    |             |
| Thermal correction to Gibbs Free Energy=     |             | 0.171494    |
| Sum of electronic and zero-point Energies=   |             | -651.614008 |
| Sum of electronic and thermal Energies=      | -651.600657 |             |
| Sum of electronic and thermal Enthalpies=    |             | -651.599712 |
| Sum of electronic and thermal Free Energies= |             | -651.654829 |

## Cartesian coordinates

|   |           |           |           |
|---|-----------|-----------|-----------|
| C | -0.111768 | -1.336289 | -0.469521 |
| O | 0.016884  | -2.228942 | -1.284995 |
| C | 1.045352  | -0.452652 | -0.116670 |
| C | 0.951399  | 0.600194  | 0.800530  |
| C | 2.267760  | -0.705007 | -0.749886 |
| C | 2.065769  | 1.387268  | 1.076824  |
| H | 0.019459  | 0.818927  | 1.311980  |
| C | 3.378885  | 0.080467  | -0.472514 |
| H | 2.324754  | -1.524220 | -1.458387 |
| C | 3.278378  | 1.128754  | 0.442333  |
| H | 1.985305  | 2.201205  | 1.789189  |
| H | 4.323161  | -0.121455 | -0.967106 |
| H | 4.145679  | 1.743059  | 0.661657  |
| C | -1.457859 | -1.160546 | 0.237506  |
| H | -2.151214 | -1.782454 | -0.339492 |
| C | -1.418464 | -1.653069 | 1.685612  |
| H | -0.707692 | -1.081867 | 2.286292  |
| H | -1.127699 | -2.704860 | 1.712045  |
| C | -1.984509 | 0.258330  | 0.133918  |
| O | -2.530702 | 0.866393  | 1.024880  |
| O | -1.776206 | 0.756466  | -1.087942 |
| C | -2.208342 | 2.108625  | -1.286746 |
| H | -3.277735 | 2.196362  | -1.090206 |

|   |           |           |           |
|---|-----------|-----------|-----------|
| H | -1.658840 | 2.775372  | -0.619052 |
| H | -1.987475 | 2.340657  | -2.325859 |
| H | -2.407112 | -1.548511 | 2.135084  |

Vibrational frequencies

|           |           |           |
|-----------|-----------|-----------|
| 34.1816   | 58.6397   | 81.7043   |
| 96.9532   | 136.5161  | 148.9115  |
| 165.1539  | 186.0599  | 197.7936  |
| 243.2190  | 263.5708  | 337.7996  |
| 394.1688  | 416.9199  | 439.3813  |
| 462.8800  | 492.7531  | 539.3993  |
| 623.9319  | 671.0796  | 703.7328  |
| 728.1349  | 754.4183  | 789.0832  |
| 831.5989  | 893.3626  | 897.8705  |
| 960.7739  | 985.0851  | 1016.5464 |
| 1025.8166 | 1036.9404 | 1044.2181 |
| 1065.0868 | 1087.9866 | 1120.3034 |
| 1135.6346 | 1147.7339 | 1176.5487 |
| 1187.9902 | 1206.0588 | 1222.6141 |
| 1278.3472 | 1297.1345 | 1314.4361 |
| 1345.8081 | 1362.8795 | 1375.4623 |
| 1421.4385 | 1490.9696 | 1496.4859 |
| 1499.3480 | 1500.4708 | 1503.5051 |
| 1504.2841 | 1547.3580 | 1673.4523 |
| 1689.8661 | 1821.4871 | 1859.4659 |
| 3093.7249 | 3095.9130 | 3104.2649 |
| 3177.9414 | 3182.6970 | 3189.7077 |
| 3213.8982 | 3219.5296 | 3226.6656 |
| 3227.5096 | 3233.8220 | 3238.7803 |

**M19**

|                                              |              |
|----------------------------------------------|--------------|
| Zero-point correction=                       | 0.545205     |
| Thermal correction to Energy=                | 0.574250     |
| Thermal correction to Enthalpy=              | 0.575194     |
| Thermal correction to Gibbs Free Energy=     | 0.485962     |
| Sum of electronic and zero-point Energies=   | -1575.857544 |
| Sum of electronic and thermal Energies=      | -1575.828500 |
| Sum of electronic and thermal Enthalpies=    | -1575.827556 |
| Sum of electronic and thermal Free Energies= | -1575.916788 |

Cartesian coordinates

|   |            |            |             |
|---|------------|------------|-------------|
| C | 4.00177000 | 3.13778900 | -0.08300700 |
| C | 2.74178600 | 4.00222100 | 0.01199600  |
| C | 1.60801100 | 3.57718800 | -0.93010300 |

|   |             |             |             |
|---|-------------|-------------|-------------|
| C | 3.86433600  | 1.68914700  | 0.39305200  |
| C | 0.93466900  | 2.29647000  | -0.52692900 |
| C | 2.96312700  | 0.80106600  | -0.47843600 |
| C | 1.49639100  | 1.09823700  | -0.32140300 |
| H | 4.79296400  | 3.61719900  | 0.50394400  |
| H | 3.01587700  | 5.03500700  | -0.22980100 |
| H | 2.00750200  | 3.47462900  | -1.94860900 |
| H | 3.49657500  | 1.67176500  | 1.42702500  |
| H | 3.24316600  | 0.93144500  | -1.53254100 |
| C | -0.73465300 | 0.52684500  | 0.20858500  |
| H | 4.35098400  | 3.13439500  | -1.12517400 |
| H | 2.36855800  | 4.00471700  | 1.04345800  |
| H | 0.85916300  | 4.37396300  | -0.97568600 |
| H | 4.86283200  | 1.23877000  | 0.40662300  |
| H | 3.14812600  | -0.24853500 | -0.23890400 |
| N | 0.59847600  | 0.09591000  | 0.11339100  |
| C | 0.93830200  | -1.28830400 | -0.09604600 |
| C | 1.56432600  | -1.98655000 | 0.94923200  |
| C | 0.67457900  | -1.87600800 | -1.33884500 |
| C | 1.89023200  | -3.32535500 | 0.73516800  |
| C | 1.00680200  | -3.22388900 | -1.50585200 |
| C | 1.60276800  | -3.94437000 | -0.47940700 |
| H | 2.37596200  | -3.89427000 | 1.52094500  |
| H | 0.79940300  | -3.71130700 | -2.45478700 |
| H | 1.85673700  | -4.98942600 | -0.62710400 |
| C | 1.84357600  | -1.29480400 | 2.27316900  |
| C | 2.99561600  | -1.92654200 | 3.05457800  |
| H | 3.24171500  | -1.30310000 | 3.91836900  |
| H | 2.72868600  | -2.91839800 | 3.43361600  |
| H | 3.89313000  | -2.02683900 | 2.43665000  |
| C | 0.03240000  | -1.10663600 | -2.48052800 |
| S | -0.79865400 | 2.26101700  | -0.17979000 |
| H | 2.12354200  | -0.25870200 | 2.04794200  |
| H | -0.06245700 | -0.05765900 | -2.18207300 |
| C | 0.57167000  | -1.24781400 | 3.13125700  |
| H | 0.21415100  | -2.26411100 | 3.33083800  |
| H | 0.77719500  | -0.76295700 | 4.09052400  |
| H | -0.22457600 | -0.69539000 | 2.62639100  |
| C | -1.37506400 | -1.63975800 | -2.77432000 |
| H | -1.84994500 | -1.04707700 | -3.56217800 |
| H | -1.32919400 | -2.67939800 | -3.11689600 |
| H | -2.00186500 | -1.60220400 | -1.87909400 |
| C | 0.90721800  | -1.14430300 | -3.73889300 |
| H | 0.45426800  | -0.54084500 | -4.53112000 |

|   |             |             |             |
|---|-------------|-------------|-------------|
| H | 1.90750600  | -0.75048200 | -3.53574800 |
| H | 1.01497900  | -2.16537300 | -4.11833200 |
| C | -1.82237300 | -0.23793100 | 0.49432100  |
| O | -1.64287600 | -1.60754000 | 0.64773600  |
| C | -3.21915400 | 0.22058900  | 0.51429100  |
| C | -3.61504100 | 1.50575900  | 0.92094500  |
| C | -4.22665000 | -0.69118300 | 0.14748600  |
| C | -4.95693000 | 1.87551700  | 0.91413700  |
| H | -2.87980300 | 2.21287500  | 1.28893700  |
| C | -5.56498100 | -0.31822000 | 0.14463500  |
| H | -3.94304200 | -1.69687400 | -0.14490200 |
| C | -5.93993900 | 0.97137000  | 0.51997900  |
| H | -5.23464300 | 2.87422000  | 1.23667400  |
| H | -6.32006300 | -1.03860700 | -0.15520200 |
| H | -6.98504400 | 1.26300500  | 0.51664000  |
| H | -2.06699500 | -1.87095800 | 1.47622900  |

#### Vibrational frequencies

|          |          |           |
|----------|----------|-----------|
| 22.5616  | 31.0177  | 33.4692   |
| 46.9665  | 54.0039  | 60.8483   |
| 81.8155  | 85.3810  | 92.7311   |
| 95.5210  | 108.7348 | 125.8176  |
| 133.5321 | 146.3160 | 180.3746  |
| 204.2582 | 209.3280 | 214.3076  |
| 228.8839 | 237.5138 | 241.0736  |
| 260.0198 | 267.2354 | 270.2638  |
| 278.3498 | 293.2326 | 307.3895  |
| 315.6252 | 326.8419 | 344.2870  |
| 345.0071 | 354.4755 | 365.0197  |
| 376.6308 | 406.5246 | 417.3104  |
| 422.4801 | 441.1408 | 452.3353  |
| 470.2556 | 496.1292 | 500.9368  |
| 522.4095 | 535.4362 | 554.0419  |
| 565.4743 | 585.3673 | 605.5428  |
| 614.6902 | 628.4811 | 639.0358  |
| 653.8185 | 661.7565 | 711.5536  |
| 717.3980 | 724.3788 | 772.0605  |
| 784.7157 | 797.7668 | 813.3849  |
| 829.0786 | 830.2332 | 833.7955  |
| 880.4087 | 888.2130 | 894.7415  |
| 914.4034 | 929.6071 | 933.8167  |
| 937.8532 | 941.6578 | 953.8383  |
| 964.0122 | 966.9381 | 975.6125  |
| 977.9768 | 984.0747 | 1002.0356 |

|           |           |           |
|-----------|-----------|-----------|
| 1006.5906 | 1008.3429 | 1012.5694 |
| 1023.3302 | 1065.7403 | 1069.9759 |
| 1074.3215 | 1085.1588 | 1095.2650 |
| 1097.3051 | 1118.9891 | 1121.2186 |
| 1133.7392 | 1147.2671 | 1151.2179 |
| 1163.7840 | 1170.9953 | 1174.6146 |
| 1180.8632 | 1187.4641 | 1204.9937 |
| 1207.6007 | 1210.2487 | 1236.6247 |
| 1250.9637 | 1272.2060 | 1281.9620 |
| 1289.9506 | 1293.1726 | 1300.1490 |
| 1308.6658 | 1315.5017 | 1331.6662 |
| 1338.7851 | 1342.5555 | 1343.9063 |
| 1360.6802 | 1363.7186 | 1372.8692 |
| 1381.4812 | 1383.7758 | 1390.7691 |
| 1396.7728 | 1401.5767 | 1404.3164 |
| 1405.0632 | 1413.4434 | 1419.9497 |
| 1423.6512 | 1478.8469 | 1481.8666 |
| 1484.2261 | 1488.6496 | 1488.7751 |
| 1490.6278 | 1492.2963 | 1495.2959 |
| 1496.3509 | 1497.8726 | 1503.8439 |
| 1507.8388 | 1508.7929 | 1513.6334 |
| 1523.3948 | 1529.4756 | 1547.5525 |
| 1655.1885 | 1672.1837 | 1678.5292 |
| 1683.0351 | 1703.8504 | 1761.2155 |
| 3047.6654 | 3048.9038 | 3051.3001 |
| 3057.6058 | 3058.5956 | 3059.7181 |
| 3060.9683 | 3061.8229 | 3061.9093 |
| 3085.2374 | 3101.5613 | 3104.0321 |
| 3104.8425 | 3111.8210 | 3114.4619 |
| 3134.3269 | 3135.9093 | 3138.0766 |
| 3142.3657 | 3143.2795 | 3144.4218 |
| 3149.7496 | 3164.5156 | 3167.9991 |
| 3195.9978 | 3199.5396 | 3207.9707 |
| 3211.6638 | 3225.6370 | 3231.3164 |
| 3234.8688 | 3241.3998 | 3827.3347 |

## <sup>2</sup>M20

|                                            |              |              |
|--------------------------------------------|--------------|--------------|
| Zero-point correction=                     | 0.546333     |              |
| Thermal correction to Energy=              | 0.575451     |              |
| Thermal correction to Enthalpy=            | 0.576395     |              |
| Thermal correction to Gibbs Free Energy=   |              | 0.484429     |
| Sum of electronic and zero-point Energies= |              | -1575.704424 |
| Sum of electronic and thermal Energies=    | -1575.675306 |              |
| Sum of electronic and thermal Enthalpies=  |              | -1575.674362 |

Sum of electronic and thermal Free Energies= -1575.766328

Cartesian coordinates

|   |           |           |           |
|---|-----------|-----------|-----------|
| C | -3.628738 | 3.334891  | 0.277573  |
| C | -2.296804 | 4.071104  | 0.441605  |
| C | -1.359492 | 3.473628  | 1.503085  |
| C | -3.547943 | 1.913645  | -0.285184 |
| C | -0.735742 | 2.180065  | 1.072218  |
| C | -2.879744 | 0.889626  | 0.648639  |
| C | -1.389222 | 1.041907  | 0.701658  |
| H | -4.265416 | 3.928374  | -0.386483 |
| H | -2.507775 | 5.104614  | 0.733230  |
| H | -1.917131 | 3.300598  | 2.432500  |
| H | -3.022303 | 1.922655  | -1.248685 |
| H | -3.277218 | 1.010335  | 1.664578  |
| C | 0.797745  | 0.364104  | 0.368186  |
| H | -4.140475 | 3.302670  | 1.248970  |
| H | -1.769397 | 4.112696  | -0.518953 |
| H | -0.568917 | 4.189690  | 1.742016  |
| H | -4.564689 | 1.561254  | -0.483525 |
| H | -3.127585 | -0.124307 | 0.327719  |
| N | -0.528640 | 0.028539  | 0.311349  |
| C | -1.017425 | -1.214864 | -0.251278 |
| C | -1.241000 | -1.260768 | -1.632791 |
| C | -1.269239 | -2.285435 | 0.613511  |
| C | -1.729092 | -2.460831 | -2.155030 |
| C | -1.772228 | -3.455652 | 0.043411  |
| C | -1.994676 | -3.545118 | -1.326313 |
| H | -1.906754 | -2.545583 | -3.222403 |
| H | -1.988567 | -4.308667 | 0.679931  |
| H | -2.380389 | -4.466251 | -1.750759 |
| C | -0.937418 | -0.084263 | -2.545204 |
| C | -2.062622 | 0.171477  | -3.553007 |
| H | -1.866214 | 1.098387  | -4.098690 |
| H | -2.131951 | -0.635115 | -4.288690 |
| H | -3.032237 | 0.261479  | -3.054919 |
| C | -1.017666 | -2.203172 | 2.108228  |
| S | 0.975943  | 1.994380  | 0.932813  |
| H | -0.840189 | 0.818084  | -1.929212 |
| H | -0.535394 | -1.244074 | 2.325728  |
| C | 0.398055  | -0.305925 | -3.268731 |
| H | 0.337010  | -1.187777 | -3.914673 |
| H | 0.643227  | 0.559370  | -3.890720 |
| H | 1.217131  | -0.464585 | -2.560754 |

|   |           |           |           |
|---|-----------|-----------|-----------|
| C | -0.069522 | -3.313069 | 2.575716  |
| H | 0.144693  | -3.195004 | 3.641584  |
| H | -0.518841 | -4.300707 | 2.433248  |
| H | 0.872720  | -3.279882 | 2.023627  |
| C | -2.340701 | -2.253298 | 2.882359  |
| H | -2.155733 | -2.152628 | 3.955440  |
| H | -3.017116 | -1.451144 | 2.573621  |
| H | -2.849078 | -3.208110 | 2.713933  |
| C | 1.886667  | -0.472289 | 0.112642  |
| O | 1.654372  | -1.784325 | 0.011192  |
| C | 3.266994  | 0.012561  | 0.016662  |
| C | 3.583554  | 1.178737  | -0.695984 |
| C | 4.291938  | -0.741746 | 0.608340  |
| C | 4.906375  | 1.592282  | -0.793756 |
| H | 2.800930  | 1.735234  | -1.202564 |
| C | 5.611236  | -0.320045 | 0.505277  |
| H | 4.050372  | -1.636216 | 1.175231  |
| C | 5.919333  | 0.847601  | -0.191773 |
| H | 5.148274  | 2.488528  | -1.354113 |
| H | 6.398623  | -0.897838 | 0.976579  |
| H | 6.950718  | 1.174231  | -0.270631 |
| H | 2.434348  | -2.236480 | -0.346516 |

#### Vibrational frequencies

|          |          |          |
|----------|----------|----------|
| 9.8690   | 14.8294  | 34.9979  |
| 43.9354  | 48.1827  | 56.7176  |
| 74.1042  | 77.0607  | 84.7485  |
| 88.7053  | 108.3292 | 116.9728 |
| 129.9399 | 137.5897 | 173.5079 |
| 189.4328 | 203.1499 | 212.9764 |
| 227.1023 | 230.4732 | 240.7121 |
| 254.4855 | 255.5750 | 264.0888 |
| 269.7319 | 290.0704 | 299.9613 |
| 321.3569 | 328.4481 | 331.2075 |
| 346.8852 | 358.4310 | 385.2237 |
| 409.2923 | 413.8868 | 415.9568 |
| 449.2424 | 449.3133 | 472.5867 |
| 487.9192 | 497.5674 | 511.4010 |
| 528.1824 | 547.8478 | 563.9492 |
| 573.6753 | 603.6157 | 613.2227 |
| 623.9211 | 635.6098 | 648.5659 |
| 655.2714 | 685.5157 | 715.7947 |
| 720.9514 | 728.7292 | 780.9681 |
| 790.3867 | 793.1323 | 817.2068 |

|           |           |           |
|-----------|-----------|-----------|
| 830.5879  | 833.2378  | 837.9382  |
| 881.0078  | 892.5817  | 900.7547  |
| 914.4330  | 928.5498  | 944.6604  |
| 948.3255  | 949.8700  | 962.8042  |
| 967.7827  | 970.1433  | 977.2267  |
| 979.5410  | 982.6405  | 1009.1263 |
| 1013.7274 | 1017.4133 | 1025.1701 |
| 1040.7430 | 1063.5699 | 1069.8166 |
| 1074.8129 | 1085.6499 | 1093.9029 |
| 1118.0387 | 1121.9035 | 1127.0002 |
| 1144.8956 | 1147.5794 | 1159.5343 |
| 1165.4035 | 1170.2695 | 1184.1715 |
| 1184.5557 | 1195.6067 | 1211.6842 |
| 1212.4220 | 1226.6252 | 1238.4519 |
| 1249.2267 | 1270.0381 | 1289.2270 |
| 1294.3094 | 1294.9591 | 1302.9131 |
| 1322.7324 | 1330.5091 | 1334.7265 |
| 1340.9394 | 1345.3373 | 1359.6773 |
| 1367.2411 | 1370.4184 | 1381.2668 |
| 1388.4237 | 1394.0594 | 1396.4013 |
| 1401.9307 | 1407.4297 | 1412.0308 |
| 1412.8915 | 1427.9087 | 1431.4015 |
| 1433.2697 | 1477.4854 | 1479.6942 |
| 1484.5668 | 1487.5238 | 1489.4499 |
| 1490.3677 | 1494.2412 | 1495.7927 |
| 1498.5527 | 1499.7728 | 1503.8358 |
| 1506.8390 | 1509.8782 | 1516.1640 |
| 1523.3879 | 1533.8634 | 1547.2324 |
| 1567.6955 | 1654.0645 | 1665.5768 |
| 1676.5154 | 1686.7380 | 1689.1955 |
| 3054.3629 | 3062.8909 | 3063.6713 |
| 3064.0675 | 3064.4174 | 3067.3720 |
| 3069.9942 | 3071.8853 | 3072.3858 |
| 3080.4001 | 3092.2012 | 3116.6238 |
| 3121.4907 | 3124.8833 | 3130.9017 |
| 3143.1835 | 3145.6795 | 3147.5157 |
| 3148.5037 | 3149.2034 | 3151.7348 |
| 3152.1028 | 3154.8351 | 3164.0686 |
| 3211.1448 | 3217.3413 | 3217.7093 |
| 3223.0341 | 3226.5843 | 3236.6541 |
| 3237.7342 | 3245.5872 | 3797.9597 |

<sup>2</sup>M21

Zero-point correction= 0.532080



|                                              |              |              |
|----------------------------------------------|--------------|--------------|
| Thermal correction to Energy=                | 0.560851     |              |
| Thermal correction to Enthalpy=              | 0.561795     |              |
| Thermal correction to Gibbs Free Energy=     |              | 0.472393     |
| Sum of electronic and zero-point Energies=   |              | -1575.364953 |
| Sum of electronic and thermal Energies=      | -1575.336182 |              |
| Sum of electronic and thermal Enthalpies=    |              | -1575.335238 |
| Sum of electronic and thermal Free Energies= |              | -1575.424641 |

Cartesian coordinates

|   |           |           |           |
|---|-----------|-----------|-----------|
| C | -3.812546 | 3.299496  | -0.218468 |
| C | -2.501196 | 4.087616  | -0.126230 |
| C | -1.529358 | 3.580879  | 0.949658  |
| C | -3.704326 | 1.833090  | -0.650255 |
| C | -0.857683 | 2.288377  | 0.582184  |
| C | -2.950952 | 0.931828  | 0.339851  |
| C | -1.458922 | 1.127731  | 0.285844  |
| H | -4.478087 | 3.817656  | -0.918440 |
| H | -2.750517 | 5.132588  | 0.092407  |
| H | -2.076393 | 3.465267  | 1.896700  |
| H | -3.221219 | 1.765512  | -1.633907 |
| H | -3.311124 | 1.140710  | 1.356501  |
| C | 0.761358  | 0.519077  | -0.285756 |
| H | -4.309483 | 3.335939  | 0.761674  |
| H | -1.990998 | 4.078926  | -1.097691 |
| H | -0.764830 | 4.342955  | 1.131630  |
| H | -4.720548 | 1.439940  | -0.771116 |
| H | -3.187037 | -0.115787 | 0.138961  |
| N | -0.617598 | 0.101549  | -0.182025 |
| C | -0.943422 | -1.245685 | 0.207511  |
| C | -1.708401 | -2.028585 | -0.677390 |
| C | -0.566526 | -1.739267 | 1.466697  |
| C | -2.058011 | -3.324512 | -0.294438 |
| C | -0.920438 | -3.049352 | 1.804589  |
| C | -1.661402 | -3.840356 | 0.935461  |
| H | -2.640237 | -3.943689 | -0.971715 |
| H | -0.615314 | -3.451660 | 2.767604  |
| H | -1.933728 | -4.853443 | 1.215970  |
| C | -2.090597 | -1.509302 | -2.052309 |
| C | -3.552973 | -1.777794 | -2.414390 |
| H | -3.789572 | -1.315259 | -3.377792 |
| H | -3.758689 | -2.849102 | -2.507542 |
| H | -4.236155 | -1.366935 | -1.663319 |
| C | 0.244095  | -0.909077 | 2.445725  |
| S | 0.902294  | 2.203368  | 0.346641  |

|   |           |           |           |
|---|-----------|-----------|-----------|
| H | -1.940236 | -0.425833 | -2.040643 |
| H | 0.282980  | 0.115971  | 2.071305  |
| C | -1.134924 | -2.099329 | -3.096858 |
| H | -1.276637 | -3.184515 | -3.168074 |
| H | -1.324983 | -1.668847 | -4.085994 |
| H | -0.101199 | -1.903238 | -2.795653 |
| C | 1.681313  | -1.441075 | 2.514539  |
| H | 2.317194  | -0.769306 | 3.100955  |
| H | 1.698510  | -2.426131 | 2.996384  |
| H | 2.097203  | -1.541214 | 1.508039  |
| C | -0.398322 | -0.862739 | 3.835953  |
| H | 0.185462  | -0.216263 | 4.498764  |
| H | -1.418014 | -0.468559 | 3.784720  |
| H | -0.441530 | -1.854721 | 4.297047  |
| C | 1.747825  | -0.315414 | -0.751758 |
| O | 1.532511  | -1.540886 | -1.108856 |
| C | 3.182390  | 0.138438  | -0.742260 |
| C | 3.633500  | 1.452380  | -0.942145 |
| C | 4.157187  | -0.861131 | -0.582147 |
| C | 4.993573  | 1.757786  | -0.933463 |
| H | 2.922493  | 2.246962  | -1.142313 |
| C | 5.513532  | -0.557839 | -0.559046 |
| H | 3.806415  | -1.883156 | -0.484846 |
| C | 5.942982  | 0.758994  | -0.729046 |
| H | 5.312003  | 2.783097  | -1.100385 |
| H | 6.242631  | -1.350722 | -0.415645 |
| H | 7.001508  | 0.999782  | -0.717138 |

#### Vibrational frequencies

|          |          |          |
|----------|----------|----------|
| 23.3694  | 29.9605  | 36.2636  |
| 36.7965  | 47.9859  | 52.1190  |
| 72.3246  | 79.4218  | 83.1531  |
| 95.0904  | 105.3783 | 124.7192 |
| 131.6697 | 140.7633 | 182.0239 |
| 193.8257 | 212.4841 | 217.7370 |
| 231.4485 | 235.6198 | 250.0991 |
| 256.6604 | 262.8228 | 277.7762 |
| 284.2513 | 291.6205 | 311.2153 |
| 320.3519 | 326.9715 | 340.7678 |
| 350.2728 | 361.6735 | 377.9738 |
| 396.3795 | 409.5294 | 424.6556 |
| 447.5321 | 454.9131 | 468.8039 |
| 480.6746 | 503.5430 | 517.1251 |
| 538.3027 | 553.6372 | 561.8489 |

|           |           |           |
|-----------|-----------|-----------|
| 594.1378  | 615.4079  | 626.4091  |
| 630.5685  | 653.8944  | 660.5947  |
| 665.6075  | 708.6967  | 714.3023  |
| 725.0573  | 772.8692  | 790.8337  |
| 793.3253  | 805.8073  | 828.7330  |
| 832.3858  | 835.7787  | 884.4598  |
| 885.7147  | 888.9589  | 915.4161  |
| 932.4564  | 933.9383  | 935.1055  |
| 936.2029  | 949.2626  | 961.4614  |
| 967.3953  | 977.7465  | 981.4607  |
| 984.4794  | 995.7684  | 1002.1714 |
| 1006.0506 | 1013.6460 | 1022.0844 |
| 1061.0060 | 1067.7279 | 1074.2614 |
| 1085.8145 | 1095.2632 | 1098.7213 |
| 1109.8204 | 1117.9390 | 1143.2456 |
| 1146.7458 | 1151.5923 | 1164.8148 |
| 1169.5106 | 1174.9507 | 1181.7180 |
| 1190.8086 | 1192.5189 | 1208.8928 |
| 1216.7669 | 1230.2915 | 1245.9236 |
| 1265.8822 | 1286.9564 | 1292.2132 |
| 1297.9730 | 1307.2838 | 1311.5998 |
| 1326.8586 | 1336.4060 | 1344.6520 |
| 1353.0196 | 1357.3990 | 1369.8662 |
| 1378.0098 | 1381.5480 | 1386.3095 |
| 1394.1264 | 1398.9714 | 1401.0328 |
| 1402.1255 | 1404.1345 | 1411.9629 |
| 1420.7823 | 1424.3594 | 1482.1826 |
| 1484.6442 | 1486.1470 | 1488.2973 |
| 1490.5741 | 1492.1962 | 1492.7703 |
| 1493.8756 | 1494.2808 | 1502.2066 |
| 1506.4560 | 1509.8489 | 1514.1500 |
| 1518.4933 | 1526.5439 | 1533.0622 |
| 1536.8695 | 1635.2427 | 1665.1090 |
| 1676.0393 | 1677.9502 | 1685.4341 |
| 1748.7855 | 3035.0474 | 3039.5466 |
| 3040.5665 | 3046.8278 | 3051.0443 |
| 3054.4581 | 3055.8182 | 3056.2822 |
| 3057.2748 | 3093.9358 | 3099.9500 |
| 3100.8408 | 3106.8022 | 3113.7125 |
| 3118.0902 | 3123.5613 | 3128.5837 |
| 3133.3499 | 3135.6765 | 3139.9992 |
| 3143.3219 | 3149.5579 | 3150.9891 |
| 3160.2016 | 3190.2850 | 3190.3808 |
| 3201.2022 | 3201.7039 | 3216.4847 |

3220.0852                      3221.1497                      3226.8669

**M22**

|                                              |             |          |
|----------------------------------------------|-------------|----------|
| Zero-point correction=                       |             | 0.104854 |
| Thermal correction to Energy=                |             | 0.112248 |
| Thermal correction to Enthalpy=              |             | 0.113192 |
| Thermal correction to Gibbs Free Energy=     |             | 0.072928 |
| Sum of electronic and zero-point Energies=   | -306.933451 |          |
| Sum of electronic and thermal Energies=      | -306.926057 |          |
| Sum of electronic and thermal Enthalpies=    | -306.925113 |          |
| Sum of electronic and thermal Free Energies= | -306.965377 |          |

Cartesian coordinates

|   |             |             |             |
|---|-------------|-------------|-------------|
| C | -1.19247200 | -0.66109400 | 0.00002800  |
| H | -1.12403800 | -1.74400300 | 0.00011200  |
| C | -2.53642400 | 0.00465100  | 0.00003000  |
| H | -2.39308600 | 1.08991500  | -0.00014800 |
| H | -3.15712200 | -0.23683400 | 0.87799200  |
| C | -0.03122300 | 0.07162900  | -0.00007500 |
| O | 0.14964400  | 1.31867400  | -0.00014300 |
| O | 1.12972500  | -0.75027500 | -0.00009400 |
| C | 2.34881700  | -0.04852700 | 0.00017600  |
| H | 3.14213700  | -0.80106100 | 0.00051800  |
| H | 2.46139400  | 0.59084800  | -0.88323300 |
| H | 2.46083400  | 0.59110000  | 0.88346600  |
| H | -3.15725400 | -0.23711100 | -0.87776000 |

Vibrational frequencies

|           |           |           |
|-----------|-----------|-----------|
| 42.9161   | 100.3399  | 142.7903  |
| 198.0611  | 234.2573  | 354.0787  |
| 484.6249  | 591.8585  | 661.2527  |
| 735.5025  | 852.0513  | 1025.1988 |
| 1068.0098 | 1093.1437 | 1173.4814 |
| 1179.1949 | 1181.5747 | 1201.9684 |
| 1391.3942 | 1448.5033 | 1481.0124 |
| 1495.8848 | 1495.9142 | 1516.0286 |
| 1525.3032 | 1737.5942 | 2990.8932 |
| 3013.9392 | 3046.2020 | 3106.2631 |
| 3124.0659 | 3137.6037 | 3194.7735 |

**M23**

|                                 |  |          |
|---------------------------------|--|----------|
| Zero-point correction=          |  | 0.333349 |
| Thermal correction to Energy=   |  | 0.351928 |
| Thermal correction to Enthalpy= |  | 0.352872 |

|                                              |             |
|----------------------------------------------|-------------|
| Thermal correction to Gibbs Free Energy=     | 0.283380    |
| Sum of electronic and zero-point Energies=   | -940.524616 |
| Sum of electronic and thermal Energies=      | -940.506037 |
| Sum of electronic and thermal Enthalpies=    | -940.505093 |
| Sum of electronic and thermal Free Energies= | -940.574585 |

Cartesian coordinates

|   |             |             |             |
|---|-------------|-------------|-------------|
| N | 1.33503000  | -0.00004200 | -0.00007600 |
| C | 0.66288600  | 1.15058600  | 0.02804100  |
| C | -0.77046600 | 1.18419400  | 0.04647300  |
| H | -1.29365000 | 2.12847600  | 0.12782600  |
| C | -1.50085500 | 0.00004000  | -0.00000600 |
| C | -0.77054000 | -1.18415100 | -0.04654700 |
| H | -1.29378900 | -2.12839700 | -0.12786500 |
| C | 0.66281600  | -1.15062300 | -0.02820200 |
| C | -2.98149000 | 0.00007900  | 0.00003000  |
| C | -3.68640300 | 0.99443100  | -0.68714300 |
| H | -3.14862400 | 1.75562100  | -1.24471000 |
| C | -5.07703700 | 0.99158800  | -0.68760700 |
| H | -5.61556800 | 1.76098000  | -1.23026500 |
| C | -5.77413300 | 0.00015500  | 0.00007700  |
| H | -6.85899000 | 0.00018400  | 0.00010300  |
| C | -5.07706300 | -0.99131200 | 0.68773900  |
| H | -5.61561800 | -1.76067500 | 1.23041500  |
| C | -3.68642900 | -0.99423200 | 0.68722800  |
| H | -3.14867300 | -1.75546000 | 1.24476500  |
| C | 1.44374800  | 2.38087000  | 0.06571500  |
| C | 2.84215000  | 2.29739400  | 0.25308000  |
| H | 3.29370400  | 1.32061700  | 0.37540300  |
| C | 3.61169000  | 3.44454800  | 0.29324200  |
| H | 4.68264300  | 3.37383700  | 0.44581300  |
| C | 3.00718600  | 4.69688100  | 0.13843900  |
| H | 3.61303600  | 5.59632200  | 0.16776800  |
| C | 1.62725900  | 4.79593800  | -0.05602600 |
| H | 1.16442200  | 5.76763200  | -0.18375500 |
| C | 0.84780000  | 3.65237400  | -0.08886200 |
| H | -0.21729100 | 3.75436900  | -0.25728600 |
| C | 1.44359300  | -2.38094500 | -0.06582600 |
| C | 2.84204200  | -2.29754000 | -0.25287400 |
| H | 3.29366900  | -1.32077600 | -0.37503300 |
| C | 3.61152800  | -3.44473400 | -0.29292000 |
| H | 4.68252000  | -3.37408100 | -0.44524800 |
| C | 3.00691200  | -4.69704000 | -0.13832900 |
| H | 3.61271800  | -5.59651300 | -0.16757500 |

|   |             |             |            |
|---|-------------|-------------|------------|
| C | 1.62692500  | -4.79602900 | 0.05577500 |
| H | 1.16401300  | -5.76770800 | 0.18334200 |
| C | 0.84752700  | -3.65242600 | 0.08852400 |
| H | -0.21760000 | -3.75441000 | 0.25670700 |

Vibrational frequencies

|           |           |           |
|-----------|-----------|-----------|
| 25.8585   | 32.1234   | 37.3081   |
| 46.1055   | 63.5914   | 80.3937   |
| 101.4563  | 104.0333  | 193.2883  |
| 196.7900  | 225.7724  | 238.3361  |
| 243.6548  | 271.1081  | 295.4810  |
| 383.1150  | 394.6661  | 395.5902  |
| 414.9208  | 423.0178  | 445.9523  |
| 453.7381  | 492.0480  | 577.5684  |
| 584.7196  | 608.8009  | 615.1127  |
| 624.4056  | 624.8477  | 633.8765  |
| 634.1873  | 680.8885  | 681.8542  |
| 682.5718  | 714.0225  | 722.5934  |
| 783.9853  | 807.7381  | 808.5645  |
| 816.3257  | 839.9354  | 861.2263  |
| 861.2682  | 880.3214  | 913.0336  |
| 931.0386  | 963.8330  | 981.4817  |
| 981.6654  | 989.1423  | 1000.7821 |
| 1010.8472 | 1012.2662 | 1016.5458 |
| 1025.8871 | 1026.0852 | 1037.2629 |
| 1038.0686 | 1048.8564 | 1049.1099 |
| 1056.5802 | 1065.8572 | 1074.2727 |
| 1093.6151 | 1125.5187 | 1126.4918 |
| 1133.5505 | 1147.6525 | 1182.2004 |
| 1184.6899 | 1187.8082 | 1190.6450 |
| 1215.6228 | 1223.7555 | 1253.7554 |
| 1292.1288 | 1317.0678 | 1335.1095 |
| 1344.9465 | 1361.1970 | 1364.8360 |
| 1378.4596 | 1380.5104 | 1388.9410 |
| 1416.7192 | 1468.8980 | 1491.3147 |
| 1500.1272 | 1513.7678 | 1520.2374 |
| 1532.8405 | 1550.1411 | 1558.8695 |
| 1623.5637 | 1627.5590 | 1632.5553 |
| 1633.4896 | 1671.2245 | 1688.3283 |
| 1699.7867 | 3210.7542 | 3212.7585 |
| 3216.6253 | 3230.8939 | 3230.9651 |
| 3236.0637 | 3238.5697 | 3238.8144 |
| 3240.9872 | 3245.5363 | 3245.6116 |
| 3257.4042 | 3257.7068 | 3265.6128 |

3266.2786                      3271.4359                      3273.4581

**R3**

Zero-point correction=                      0.133881  
Thermal correction to Energy=                      0.142573  
Thermal correction to Enthalpy=                      0.143517  
Thermal correction to Gibbs Free Energy=                      0.099821  
Sum of electronic and zero-point Energies=                      -455.113389  
Sum of electronic and thermal Energies=                      -455.104697  
Sum of electronic and thermal Enthalpies=                      -455.103753  
Sum of electronic and thermal Free Energies=                      -455.147449

Cartesian coordinates

|   |           |           |           |
|---|-----------|-----------|-----------|
| N | 1.183741  | 0.000262  | 0.291693  |
| C | 0.561098  | -1.187335 | 0.227663  |
| C | -0.811116 | -1.213681 | 0.077183  |
| H | -1.324986 | -2.164740 | 0.025086  |
| C | -1.499359 | 0.000022  | 0.001562  |
| C | -0.811321 | 1.213843  | 0.076825  |
| H | -1.325322 | 2.164817  | 0.024486  |
| C | 0.560923  | 1.187735  | 0.227237  |
| H | 1.192388  | 2.063338  | 0.307425  |
| H | 1.192628  | -2.062855 | 0.308340  |
| O | 2.532311  | 0.000496  | 0.505096  |
| C | 3.256555  | -0.000649 | -0.750562 |
| H | 4.301198  | 0.000187  | -0.449022 |
| H | 3.018880  | -0.902265 | -1.317694 |
| H | 3.017980  | 0.899389  | -1.319789 |
| C | -2.932149 | -0.000157 | -0.150795 |
| N | -4.080746 | -0.000334 | -0.273733 |

Vibrational frequencies

|           |           |           |
|-----------|-----------|-----------|
| 76.8450   | 86.5045   | 151.9635  |
| 199.3592  | 216.8115  | 335.2275  |
| 406.6730  | 415.6638  | 440.0519  |
| 519.4923  | 570.3508  | 593.6010  |
| 679.7256  | 714.6366  | 752.3408  |
| 861.1805  | 863.8732  | 883.8397  |
| 993.0133  | 1007.0394 | 1022.2176 |
| 1081.1450 | 1144.4864 | 1181.8394 |
| 1212.2100 | 1221.1470 | 1240.1307 |
| 1261.4972 | 1312.2582 | 1341.8589 |
| 1476.7961 | 1488.5575 | 1496.7373 |
| 1505.3527 | 1554.6589 | 1656.7081 |

|           |           |           |
|-----------|-----------|-----------|
| 1719.3939 | 2437.6189 | 3096.8761 |
| 3192.8624 | 3240.7101 | 3268.4433 |
| 3269.2129 | 3287.2435 | 3288.6353 |

### M9

|                                              |          |              |
|----------------------------------------------|----------|--------------|
| Zero-point correction=                       | 0.708521 |              |
| Thermal correction to Energy=                | 0.751805 |              |
| Thermal correction to Enthalpy=              | 0.752749 |              |
| Thermal correction to Gibbs Free Energy=     |          | 0.632925     |
| Sum of electronic and zero-point Energies=   |          | -2295.433087 |
| Sum of electronic and thermal Energies=      |          | -2295.389802 |
| Sum of electronic and thermal Enthalpies=    |          | -2295.388858 |
| Sum of electronic and thermal Free Energies= |          | -2295.508682 |

### Cartesian coordinates

|   |           |           |           |
|---|-----------|-----------|-----------|
| C | -4.828115 | -1.981769 | -1.336804 |
| C | -4.479182 | -0.901618 | -2.362178 |
| C | -3.897563 | 0.383511  | -1.760502 |
| C | -3.638796 | -2.647042 | -0.641117 |
| C | -2.502634 | 0.227412  | -1.226647 |
| C | -2.851497 | -1.748081 | 0.318780  |
| C | -2.033562 | -0.682836 | -0.351400 |
| H | -5.405967 | -2.762878 | -1.842754 |
| H | -5.390264 | -0.634861 | -2.908428 |
| H | -4.553629 | 0.742720  | -0.955904 |
| H | -2.948686 | -3.049423 | -1.393226 |
| H | -3.546092 | -1.260430 | 1.018903  |
| C | -0.071319 | 0.564484  | -0.659647 |
| H | -5.492637 | -1.550297 | -0.575053 |
| H | -3.770924 | -1.304233 | -3.097760 |
| H | -3.892884 | 1.167055  | -2.525184 |
| H | -4.009932 | -3.501042 | -0.064962 |
| H | -2.181763 | -2.370026 | 0.916083  |
| N | -0.668312 | -0.550427 | -0.031987 |
| C | 0.126038  | -1.772249 | 0.100137  |
| C | 0.519271  | -2.447636 | -1.070947 |
| C | 0.462030  | -2.268710 | 1.372245  |
| C | 1.283282  | -3.610634 | -0.940728 |
| C | 1.216302  | -3.440382 | 1.450221  |
| C | 1.635490  | -4.106173 | 0.306251  |
| H | 1.601530  | -4.137455 | -1.835892 |
| H | 1.483949  | -3.831616 | 2.428073  |
| H | 2.227930  | -5.012628 | 0.387418  |
| C | 0.171955  | -1.962727 | -2.470335 |



|   |           |           |           |
|---|-----------|-----------|-----------|
| C | -0.393434 | -3.083146 | -3.351797 |
| H | -0.744740 | -2.665853 | -4.300266 |
| H | 0.364330  | -3.836985 | -3.586359 |
| H | -1.233735 | -3.589542 | -2.868127 |
| C | 0.034076  | -1.596592 | 2.661282  |
| S | -1.232924 | 1.326229  | -1.755098 |
| H | -0.608565 | -1.203721 | -2.393818 |
| H | -0.525827 | -0.708546 | 2.372231  |
| C | 1.395547  | -1.323871 | -3.139741 |
| H | 2.182694  | -2.072413 | -3.283017 |
| H | 1.125725  | -0.921639 | -4.121705 |
| H | 1.804054  | -0.516148 | -2.527255 |
| C | 1.243420  | -1.157286 | 3.494750  |
| H | 0.908116  | -0.595797 | 4.374809  |
| H | 1.799506  | -2.028217 | 3.857698  |
| H | 1.926779  | -0.544447 | 2.905018  |
| C | -0.880967 | -2.495198 | 3.504166  |
| H | -1.200628 | -1.962483 | 4.405551  |
| H | -1.776601 | -2.804849 | 2.958856  |
| H | -0.352709 | -3.399553 | 3.823238  |
| C | 1.181317  | 1.006030  | -0.315965 |
| O | 1.731715  | 0.450392  | 0.786804  |
| H | 2.475154  | -0.254450 | 0.490449  |
| C | 2.016170  | 1.956749  | -1.075482 |
| C | 1.636341  | 2.600469  | -2.267568 |
| C | 3.311290  | 2.208632  | -0.584355 |
| C | 2.502604  | 3.476386  | -2.915090 |
| H | 0.676751  | 2.410070  | -2.731444 |
| C | 4.174708  | 3.077180  | -1.238912 |
| H | 3.623651  | 1.705866  | 0.322788  |
| C | 3.774730  | 3.725222  | -2.406127 |
| H | 2.179416  | 3.958677  | -3.832482 |
| H | 5.167208  | 3.248549  | -0.833282 |
| H | 4.447049  | 4.407167  | -2.916594 |
| C | 4.070033  | -1.700837 | 0.921602  |
| O | 4.596979  | -2.938107 | 0.626177  |
| O | 3.362199  | -1.199416 | -0.011019 |
| O | 4.346186  | -1.225009 | 2.022209  |
| H | 4.195922  | -3.191491 | -0.216367 |
| N | -2.639244 | 2.051869  | 1.400567  |
| C | -2.273053 | 3.094327  | 0.630152  |
| C | -0.978466 | 3.560942  | 0.709956  |
| H | -0.674303 | 4.396168  | 0.092402  |
| C | -0.078035 | 2.910411  | 1.561045  |

|   |           |          |           |
|---|-----------|----------|-----------|
| C | -0.506997 | 1.836077 | 2.363517  |
| H | 0.178241  | 1.326853 | 3.028907  |
| C | -1.808080 | 1.417436 | 2.258974  |
| C | 1.259041  | 3.408126 | 1.713547  |
| C | -4.791059 | 2.286653 | 2.229800  |
| H | -4.819721 | 3.351697 | 1.990995  |
| H | -4.451361 | 2.124691 | 3.254852  |
| H | -5.767217 | 1.832645 | 2.073975  |
| N | 2.320515  | 3.840501 | 1.871246  |
| H | -2.248069 | 0.599912 | 2.817394  |
| H | -3.039396 | 3.504673 | -0.015212 |
| O | -3.924779 | 1.592324 | 1.303546  |

Vibrational frequencies

|          |          |          |
|----------|----------|----------|
| 26.2770  | 31.2809  | 34.4976  |
| 38.2128  | 42.5228  | 46.1432  |
| 50.7679  | 58.0659  | 61.8785  |
| 66.0800  | 74.9748  | 84.3979  |
| 91.2830  | 96.7499  | 99.2154  |
| 102.1101 | 102.9076 | 103.3067 |
| 112.6788 | 115.7816 | 120.4449 |
| 129.3206 | 137.6327 | 140.2785 |
| 151.8288 | 156.4510 | 165.5547 |
| 171.0220 | 186.7302 | 192.8778 |
| 202.3019 | 212.3875 | 223.4109 |
| 230.9195 | 232.7838 | 243.2603 |
| 249.2194 | 260.0811 | 273.6790 |
| 275.5815 | 280.1182 | 295.9139 |
| 301.5197 | 322.4420 | 326.6127 |
| 333.7719 | 336.3864 | 347.6505 |
| 378.0728 | 386.2219 | 403.2169 |
| 407.9343 | 412.6290 | 415.4021 |
| 420.2170 | 433.7868 | 441.9300 |
| 453.7129 | 461.8978 | 463.8580 |
| 502.5457 | 513.5188 | 517.5968 |
| 518.5283 | 534.0634 | 561.6739 |
| 564.3601 | 569.7481 | 572.2486 |
| 576.9678 | 601.1557 | 616.1807 |
| 620.7757 | 627.1159 | 642.9389 |
| 649.9315 | 650.7560 | 672.5816 |
| 676.6608 | 689.5907 | 706.0283 |
| 708.4169 | 711.9195 | 725.1278 |
| 727.7972 | 774.4170 | 784.0060 |
| 792.1325 | 815.4228 | 824.2640 |

|           |           |           |
|-----------|-----------|-----------|
| 827.9656  | 832.1981  | 832.4920  |
| 839.8744  | 853.4098  | 856.0339  |
| 860.3560  | 885.0961  | 902.3130  |
| 916.1642  | 924.9217  | 930.7816  |
| 933.3034  | 934.7993  | 937.7153  |
| 965.5231  | 966.6011  | 970.2357  |
| 973.9995  | 976.3994  | 985.8897  |
| 989.2763  | 995.7482  | 998.3379  |
| 1005.7286 | 1010.1173 | 1024.3079 |
| 1024.9824 | 1029.9779 | 1069.7914 |
| 1070.5824 | 1072.5667 | 1077.8550 |
| 1083.6343 | 1090.5266 | 1097.7755 |
| 1109.9481 | 1122.7242 | 1133.5748 |
| 1141.3320 | 1144.0503 | 1145.0343 |
| 1151.3976 | 1166.1635 | 1173.5410 |
| 1174.1756 | 1182.5367 | 1186.2368 |
| 1188.2802 | 1202.0292 | 1206.9915 |
| 1216.0498 | 1221.7060 | 1223.4261 |
| 1235.2704 | 1241.7666 | 1252.0596 |
| 1259.1272 | 1267.4483 | 1269.1634 |
| 1291.5098 | 1294.1286 | 1300.8358 |
| 1303.8094 | 1306.1558 | 1317.7257 |
| 1327.5576 | 1333.5290 | 1337.4597 |
| 1342.6737 | 1350.5028 | 1353.1957 |
| 1364.9399 | 1369.8356 | 1379.8099 |
| 1385.4116 | 1387.4129 | 1398.9086 |
| 1401.7445 | 1405.1124 | 1407.4375 |
| 1409.7800 | 1419.5649 | 1425.1069 |
| 1425.9114 | 1474.8230 | 1475.0996 |
| 1477.3048 | 1482.7183 | 1487.5684 |
| 1488.6042 | 1489.3261 | 1490.1893 |
| 1490.2884 | 1492.6994 | 1499.2219 |
| 1499.8738 | 1502.6600 | 1504.5685 |
| 1506.7393 | 1509.0993 | 1514.1425 |
| 1515.0295 | 1517.8304 | 1527.6131 |
| 1539.0066 | 1547.2986 | 1558.6555 |
| 1602.3667 | 1612.8842 | 1657.3556 |
| 1675.5003 | 1681.1952 | 1688.1877 |
| 1708.6375 | 1719.8673 | 1770.5376 |
| 2162.3876 | 2421.7504 | 3045.4043 |
| 3046.6180 | 3053.3196 | 3053.5745 |
| 3059.0178 | 3062.5659 | 3063.3433 |
| 3064.1094 | 3065.5858 | 3095.6850 |
| 3105.5577 | 3109.6153 | 3111.8030 |

|           |           |           |
|-----------|-----------|-----------|
| 3113.7681 | 3121.4761 | 3132.0652 |
| 3137.7563 | 3139.2738 | 3149.6003 |
| 3150.7374 | 3159.3516 | 3161.1014 |
| 3167.4738 | 3182.8775 | 3189.8649 |
| 3190.2544 | 3197.6979 | 3199.6875 |
| 3201.9734 | 3210.7783 | 3216.9466 |
| 3221.8984 | 3233.1570 | 3245.7826 |
| 3250.3558 | 3262.6164 | 3268.1642 |
| 3275.5543 | 3278.3618 | 3850.7215 |

**<sup>o</sup>TS7**

|                                              |              |              |
|----------------------------------------------|--------------|--------------|
| Zero-point correction=                       | 0.704097     |              |
| Thermal correction to Energy=                | 0.747448     |              |
| Thermal correction to Enthalpy=              | 0.748392     |              |
| Thermal correction to Gibbs Free Energy=     |              | 0.628248     |
| Sum of electronic and zero-point Energies=   |              | -2295.435004 |
| Sum of electronic and thermal Energies=      | -2295.391653 |              |
| Sum of electronic and thermal Enthalpies=    |              | -2295.390709 |
| Sum of electronic and thermal Free Energies= |              | -2295.510852 |

Cartesian coordinates

|   |           |           |           |
|---|-----------|-----------|-----------|
| C | 4.570429  | -2.287040 | 1.548319  |
| C | 4.284915  | -1.121952 | 2.499238  |
| C | 3.853091  | 0.176061  | 1.803942  |
| C | 3.358880  | -2.866870 | 0.814179  |
| C | 2.463511  | 0.118504  | 1.240042  |
| C | 2.713279  | -1.934227 | -0.217846 |
| C | 1.950251  | -0.790995 | 0.383123  |
| H | 5.038041  | -3.093572 | 2.123426  |
| H | 5.195797  | -0.911805 | 3.069982  |
| H | 4.557356  | 0.414695  | 0.995381  |
| H | 2.594828  | -3.171549 | 1.540502  |
| H | 3.490590  | -1.519420 | -0.876177 |
| C | 0.072377  | 0.575375  | 0.637683  |
| H | 5.314467  | -1.965168 | 0.806259  |
| H | 3.513224  | -1.413567 | 3.223454  |
| H | 3.909482  | 1.004419  | 2.517179  |
| H | 3.676167  | -3.774502 | 0.290431  |
| H | 2.034714  | -2.512007 | -0.848657 |
| N | 0.608613  | -0.578714 | 0.045101  |
| C | -0.259623 | -1.745032 | -0.125619 |
| C | -0.717546 | -2.401916 | 1.032564  |
| C | -0.597458 | -2.206349 | -1.409289 |
| C | -1.554709 | -3.510186 | 0.875829  |

|   |           |           |           |
|---|-----------|-----------|-----------|
| C | -1.434969 | -3.318597 | -1.512848 |
| C | -1.920126 | -3.965014 | -0.383273 |
| H | -1.925188 | -4.022386 | 1.759148  |
| H | -1.713485 | -3.679376 | -2.499164 |
| H | -2.576220 | -4.824141 | -0.484909 |
| C | -0.378426 | -1.944619 | 2.443721  |
| C | 0.064479  | -3.103088 | 3.345943  |
| H | 0.425465  | -2.709148 | 4.300582  |
| H | -0.762959 | -3.784683 | 3.565457  |
| H | 0.869267  | -3.686294 | 2.889575  |
| C | -0.077623 | -1.564470 | -2.679728 |
| S | 1.257770  | 1.296425  | 1.713544  |
| H | 0.459682  | -1.245369 | 2.395574  |
| H | 0.547078  | -0.728967 | -2.368512 |
| C | -1.575920 | -1.217299 | 3.070152  |
| H | -2.420106 | -1.906983 | 3.181705  |
| H | -1.314506 | -0.835201 | 4.062409  |
| H | -1.902669 | -0.380598 | 2.447918  |
| C | -1.216802 | -1.013079 | -3.543000 |
| H | -0.804374 | -0.508078 | -4.424388 |
| H | -1.864393 | -1.821346 | -3.897777 |
| H | -1.830706 | -0.315807 | -2.970987 |
| C | 0.782213  | -2.536923 | -3.498067 |
| H | 1.176506  | -2.031588 | -4.385513 |
| H | 1.629945  | -2.923657 | -2.925396 |
| H | 0.190105  | -3.392311 | -3.839329 |
| C | -1.168913 | 1.078759  | 0.237513  |
| O | -1.723735 | 0.558111  | -0.821946 |
| H | -2.710711 | -0.284153 | -0.467950 |
| C | -1.948241 | 2.069083  | 1.022601  |
| C | -1.599360 | 2.542544  | 2.299392  |
| C | -3.156340 | 2.518699  | 0.463396  |
| C | -2.403541 | 3.462076  | 2.964286  |
| H | -0.722725 | 2.169061  | 2.815242  |
| C | -3.960538 | 3.433752  | 1.132072  |
| H | -3.442854 | 2.134352  | -0.507937 |
| C | -3.584090 | 3.920027  | 2.382611  |
| H | -2.110970 | 3.809646  | 3.950074  |
| H | -4.886727 | 3.768670  | 0.674939  |
| H | -4.209673 | 4.636673  | 2.905016  |
| C | -4.130271 | -1.548659 | -1.024050 |
| O | -4.804032 | -2.646414 | -0.607315 |
| O | -3.421016 | -1.007035 | -0.075022 |
| O | -4.248533 | -1.165576 | -2.171539 |

|   |           |           |           |
|---|-----------|-----------|-----------|
| H | -4.505420 | -2.841709 | 0.292324  |
| N | 2.881395  | 1.843710  | -1.341047 |
| C | 2.605368  | 2.939150  | -0.587753 |
| C | 1.358675  | 3.503790  | -0.661279 |
| H | 1.132940  | 4.372229  | -0.055783 |
| C | 0.380886  | 2.917160  | -1.492617 |
| C | 0.732918  | 1.806184  | -2.305137 |
| H | 0.006577  | 1.356690  | -2.969931 |
| C | 1.987745  | 1.283761  | -2.208730 |
| C | -0.888371 | 3.540247  | -1.669263 |
| C | 5.017408  | 1.919551  | -2.226036 |
| H | 5.113842  | 2.986349  | -2.010817 |
| H | 4.643440  | 1.763639  | -3.240692 |
| H | 5.972505  | 1.415916  | -2.090045 |
| N | -1.908035 | 4.066129  | -1.843987 |
| H | 2.355006  | 0.432556  | -2.769044 |
| H | 3.410384  | 3.295300  | 0.042497  |
| O | 4.135666  | 1.297422  | -1.269887 |

Vibrational frequencies

|           |          |          |
|-----------|----------|----------|
| -677.1218 | 23.1556  | 28.8730  |
| 31.8624   | 38.6132  | 44.2964  |
| 50.3294   | 52.4536  | 58.3326  |
| 62.0384   | 64.3784  | 76.3439  |
| 81.8440   | 88.5418  | 93.0076  |
| 96.4133   | 103.2449 | 107.9982 |
| 112.6792  | 116.1774 | 118.6322 |
| 121.7323  | 129.7250 | 130.8412 |
| 139.3333  | 151.5616 | 155.1322 |
| 168.3557  | 174.7727 | 179.9603 |
| 192.8293  | 198.6135 | 200.5589 |
| 212.3478  | 221.0564 | 227.2996 |
| 238.1510  | 243.7873 | 250.9423 |
| 262.1336  | 266.4775 | 276.6668 |
| 293.7827  | 304.3096 | 316.4380 |
| 321.4457  | 329.9095 | 338.9274 |
| 352.5851  | 376.8104 | 395.1038 |
| 398.0045  | 406.3875 | 418.0417 |
| 424.8354  | 437.5783 | 446.4629 |
| 450.1424  | 452.9680 | 462.8958 |
| 470.5166  | 495.6107 | 505.1195 |
| 511.0052  | 522.1757 | 540.2369 |
| 542.2681  | 555.6343 | 565.4510 |
| 577.5285  | 580.4356 | 600.1998 |

|           |           |           |
|-----------|-----------|-----------|
| 623.9411  | 627.1071  | 629.9993  |
| 649.5073  | 652.3177  | 657.3468  |
| 672.8922  | 675.4695  | 681.5646  |
| 705.8335  | 712.9142  | 719.8447  |
| 726.2801  | 764.9076  | 774.5196  |
| 788.3594  | 793.1118  | 810.1431  |
| 812.8564  | 814.5529  | 826.9429  |
| 830.2905  | 831.0220  | 832.7295  |
| 870.3400  | 881.5400  | 889.5867  |
| 898.3211  | 914.8117  | 924.6880  |
| 927.6172  | 929.1917  | 940.6243  |
| 947.4034  | 961.7928  | 966.2317  |
| 968.9076  | 973.7722  | 974.8777  |
| 979.4383  | 983.8378  | 995.0110  |
| 1002.3929 | 1005.6109 | 1012.8855 |
| 1025.8191 | 1030.7062 | 1048.5932 |
| 1060.4498 | 1068.3320 | 1071.2954 |
| 1076.0314 | 1083.5449 | 1095.8365 |
| 1111.6224 | 1117.7164 | 1120.9912 |
| 1137.7852 | 1139.6017 | 1144.6055 |
| 1148.4345 | 1156.8388 | 1164.8391 |
| 1169.4428 | 1175.2793 | 1181.4433 |
| 1184.2338 | 1186.2195 | 1203.4596 |
| 1205.1045 | 1214.8222 | 1222.0647 |
| 1231.0560 | 1234.9293 | 1248.7794 |
| 1252.5904 | 1256.0477 | 1272.1015 |
| 1278.1259 | 1290.2426 | 1292.3026 |
| 1300.8158 | 1304.9143 | 1308.8709 |
| 1317.7531 | 1334.5713 | 1336.8001 |
| 1340.1959 | 1355.0326 | 1358.3796 |
| 1361.2240 | 1369.1046 | 1375.0657 |
| 1381.5359 | 1391.2575 | 1394.5784 |
| 1402.1224 | 1402.8421 | 1404.3577 |
| 1416.0905 | 1421.4960 | 1423.6162 |
| 1424.1935 | 1427.8633 | 1474.1041 |
| 1477.0830 | 1480.0594 | 1483.1921 |
| 1485.3136 | 1486.6799 | 1488.7794 |
| 1490.4648 | 1491.1630 | 1492.9964 |
| 1494.6878 | 1497.4027 | 1500.9505 |
| 1504.1990 | 1509.0188 | 1509.9426 |
| 1512.3579 | 1513.8009 | 1517.1884 |
| 1523.8326 | 1526.9682 | 1539.9669 |
| 1542.8372 | 1617.2762 | 1655.4311 |
| 1672.7405 | 1675.8076 | 1681.2785 |

|           |           |           |
|-----------|-----------|-----------|
| 1690.9710 | 1702.0958 | 1765.6744 |
| 1974.9626 | 2366.7017 | 3042.4881 |
| 3048.3057 | 3050.9753 | 3055.1756 |
| 3055.6124 | 3058.4155 | 3063.5109 |
| 3064.8228 | 3066.7790 | 3083.4746 |
| 3105.4487 | 3110.2700 | 3115.3433 |
| 3115.4943 | 3123.2349 | 3126.1051 |
| 3133.7073 | 3137.5336 | 3141.9095 |
| 3151.0429 | 3154.4864 | 3155.5333 |
| 3162.9146 | 3175.3847 | 3175.6543 |
| 3191.9568 | 3195.4915 | 3198.9191 |
| 3199.9916 | 3208.7030 | 3214.7920 |
| 3216.5765 | 3219.2404 | 3230.7556 |
| 3245.1141 | 3259.8533 | 3262.5391 |
| 3274.9412 | 3276.5795 | 3846.0473 |

## <sup>2</sup>M10

|                                              |             |
|----------------------------------------------|-------------|
| Zero-point correction=                       | 0.130650    |
| Thermal correction to Energy=                | 0.139824    |
| Thermal correction to Enthalpy=              | 0.140768    |
| Thermal correction to Gibbs Free Energy=     | 0.095188    |
| Sum of electronic and zero-point Energies=   | -455.257655 |
| Sum of electronic and thermal Energies=      | -455.248481 |
| Sum of electronic and thermal Enthalpies=    | -455.247537 |
| Sum of electronic and thermal Free Energies= | -455.293118 |

### Cartesian coordinates

|   |             |             |             |
|---|-------------|-------------|-------------|
| N | -1.21827400 | -0.00000200 | -0.43241800 |
| C | -0.56500300 | -1.20840500 | -0.29783900 |
| C | 0.77918200  | -1.22607800 | -0.10748000 |
| H | 1.28715900  | -2.17982900 | -0.03296700 |
| C | 1.51272800  | -0.00007100 | -0.01120700 |
| C | 0.77924500  | 1.22597400  | -0.10752300 |
| H | 1.28727200  | 2.17970000  | -0.03304100 |
| C | -0.56494200 | 1.20837200  | -0.29788400 |
| H | -1.19018900 | 2.08699900  | -0.38587800 |
| H | -1.19029500 | -2.08700200 | -0.38580200 |
| O | -2.59039600 | 0.00003300  | -0.45135500 |
| C | -3.11752600 | 0.00007500  | 0.88479400  |
| H | -4.19993200 | 0.00010300  | 0.76540100  |
| H | -2.79536300 | -0.89707000 | 1.42089600  |
| H | -2.79531200 | 0.89722300  | 1.42086100  |
| C | 2.90894400  | -0.00013200 | 0.18295100  |
| N | 4.06456700  | 0.00017500  | 0.34191700  |



Vibrational frequencies

|           |           |           |
|-----------|-----------|-----------|
| 48.4932   | 110.6588  | 119.3212  |
| 155.4275  | 212.9958  | 262.4564  |
| 370.4554  | 425.3388  | 451.0867  |
| 484.3690  | 518.8612  | 580.3012  |
| 635.8025  | 669.4406  | 709.3919  |
| 752.5281  | 768.9912  | 818.3542  |
| 946.7715  | 957.6623  | 1003.8701 |
| 1033.2402 | 1125.1835 | 1176.7579 |
| 1194.1158 | 1217.3342 | 1249.5585 |
| 1280.8133 | 1284.2106 | 1352.2775 |
| 1417.1551 | 1469.3174 | 1486.5452 |
| 1488.9820 | 1510.2022 | 1563.8356 |
| 1739.5247 | 2308.8663 | 3070.8872 |
| 3158.2758 | 3200.7929 | 3241.9065 |
| 3242.7103 | 3265.9005 | 3267.9588 |

**<sup>2</sup>M11**

|                                              |              |              |
|----------------------------------------------|--------------|--------------|
| Zero-point correction=                       | 0.533230     |              |
| Thermal correction to Energy=                | 0.562185     |              |
| Thermal correction to Enthalpy=              | 0.563129     |              |
| Thermal correction to Gibbs Free Energy=     |              | 0.471694     |
| Sum of electronic and zero-point Energies=   |              | -1575.271146 |
| Sum of electronic and thermal Energies=      | -1575.242191 |              |
| Sum of electronic and thermal Enthalpies=    |              | -1575.241247 |
| Sum of electronic and thermal Free Energies= |              | -1575.332682 |

Cartesian coordinates

|   |           |           |           |
|---|-----------|-----------|-----------|
| C | 3.842271  | -3.244428 | 0.140241  |
| C | 2.559260  | -4.057262 | -0.049302 |
| C | 1.405635  | -3.657635 | 0.880709  |
| C | 3.767051  | -1.766991 | -0.253253 |
| C | 0.784464  | -2.335242 | 0.534413  |
| C | 2.870917  | -0.900856 | 0.644964  |
| C | 1.402897  | -1.137591 | 0.431250  |
| H | 4.636127  | -3.714787 | -0.449948 |
| H | 2.790259  | -5.111366 | 0.137164  |
| H | 1.769170  | -3.627358 | 1.916886  |
| H | 3.432000  | -1.674381 | -1.294752 |
| H | 3.112638  | -1.100149 | 1.697385  |
| C | -0.777725 | -0.477927 | -0.082535 |
| H | 4.156415  | -3.314902 | 1.190919  |
| H | 2.221913  | -3.983817 | -1.090372 |
| H | 0.632376  | -4.430777 | 0.848817  |

|   |           |           |           |
|---|-----------|-----------|-----------|
| H | 4.778774  | -1.349172 | -0.210582 |
| H | 3.092425  | 0.154654  | 0.471120  |
| N | 0.537567  | -0.096163 | 0.086269  |
| C | 0.942400  | 1.285044  | 0.145074  |
| C | 1.643824  | 1.829525  | -0.938888 |
| C | 0.651285  | 2.015019  | 1.304031  |
| C | 2.035062  | 3.165789  | -0.851027 |
| C | 1.054741  | 3.352404  | 1.342763  |
| C | 1.737544  | 3.925003  | 0.276574  |
| H | 2.570760  | 3.621872  | -1.678538 |
| H | 0.831080  | 3.949854  | 2.222155  |
| H | 2.043760  | 4.965201  | 0.324829  |
| C | 1.932091  | 1.019809  | -2.189886 |
| C | 3.399736  | 1.115192  | -2.616230 |
| H | 3.587600  | 0.450122  | -3.464271 |
| H | 3.660080  | 2.131306  | -2.928438 |
| H | 4.071778  | 0.828281  | -1.800777 |
| C | -0.095971 | 1.413008  | 2.481663  |
| S | -0.930256 | -2.194036 | 0.213231  |
| H | 1.717976  | -0.031924 | -1.971622 |
| H | -0.212677 | 0.338676  | 2.305844  |
| C | 0.990345  | 1.456935  | -3.318844 |
| H | 1.186349  | 2.499153  | -3.594092 |
| H | 1.141240  | 0.836297  | -4.207379 |
| H | -0.050381 | 1.378157  | -2.993273 |
| C | -1.497670 | 2.026157  | 2.594288  |
| H | -2.066713 | 1.536504  | 3.390265  |
| H | -1.430455 | 3.093155  | 2.832788  |
| H | -2.046379 | 1.923463  | 1.653848  |
| C | 0.686668  | 1.579452  | 3.788599  |
| H | 0.157919  | 1.085840  | 4.609013  |
| H | 1.684878  | 1.139635  | 3.707402  |
| H | 0.800602  | 2.635235  | 4.053535  |
| C | -1.811310 | 0.372919  | -0.573113 |
| O | -1.578687 | 1.513371  | -1.039437 |
| C | -3.222070 | -0.134429 | -0.556028 |
| C | -3.769624 | -0.828104 | 0.528186  |
| C | -4.040043 | 0.177422  | -1.647893 |
| C | -5.103750 | -1.229800 | 0.505157  |
| H | -3.161743 | -1.030478 | 1.405650  |
| C | -5.367787 | -0.232204 | -1.675228 |
| H | -3.614348 | 0.743553  | -2.470385 |
| C | -5.902225 | -0.940989 | -0.598786 |
| H | -5.521711 | -1.758623 | 1.355803  |

|   |           |           |           |
|---|-----------|-----------|-----------|
| H | -5.989006 | 0.003789  | -2.533421 |
| H | -6.940162 | -1.257597 | -0.617049 |

Vibrational frequencies

|           |           |           |
|-----------|-----------|-----------|
| 14.4779   | 20.3480   | 35.8536   |
| 43.5421   | 49.6825   | 53.3321   |
| 61.4821   | 66.8007   | 79.9592   |
| 89.3898   | 109.1258  | 113.5619  |
| 126.2481  | 136.4570  | 168.1669  |
| 200.3992  | 201.9261  | 212.9965  |
| 227.6467  | 233.5501  | 243.3942  |
| 256.4437  | 258.8526  | 264.6155  |
| 270.4654  | 287.0498  | 298.2258  |
| 316.1359  | 326.1687  | 330.4608  |
| 344.5002  | 357.3234  | 385.5897  |
| 401.8134  | 410.0229  | 419.3839  |
| 442.3402  | 447.0812  | 469.3136  |
| 481.0337  | 502.3052  | 525.1897  |
| 553.9918  | 561.8635  | 565.1162  |
| 598.7840  | 612.7928  | 626.4046  |
| 646.0188  | 653.3200  | 664.2995  |
| 686.2451  | 714.8512  | 722.0479  |
| 724.1853  | 776.1940  | 792.0300  |
| 795.9829  | 816.9300  | 828.4974  |
| 830.4505  | 834.5144  | 883.5942  |
| 893.3438  | 901.2691  | 915.2358  |
| 933.5872  | 935.0728  | 945.3345  |
| 949.6142  | 958.8927  | 967.2653  |
| 968.7902  | 975.0692  | 976.6050  |
| 987.8677  | 1005.1939 | 1009.3020 |
| 1010.7502 | 1018.2751 | 1029.4450 |
| 1063.1592 | 1070.7434 | 1074.5758 |
| 1084.0133 | 1098.8673 | 1113.4365 |
| 1121.0136 | 1122.5253 | 1144.7951 |
| 1149.1536 | 1164.1089 | 1170.5716 |
| 1173.1047 | 1177.8430 | 1184.7029 |
| 1192.1729 | 1195.8018 | 1211.0000 |
| 1238.2465 | 1247.2081 | 1252.4757 |
| 1284.7759 | 1291.9965 | 1293.7925 |
| 1303.4767 | 1318.5545 | 1324.7714 |
| 1335.5694 | 1346.6176 | 1354.9248 |
| 1355.7051 | 1356.8411 | 1374.7830 |
| 1383.5670 | 1390.3841 | 1395.7101 |
| 1398.2461 | 1401.7633 | 1405.2749 |

|           |           |           |
|-----------|-----------|-----------|
| 1406.2247 | 1414.9861 | 1420.7390 |
| 1424.9326 | 1467.3227 | 1478.2217 |
| 1481.7462 | 1483.1236 | 1488.3841 |
| 1490.1030 | 1491.5513 | 1492.7592 |
| 1494.0137 | 1497.0735 | 1497.4779 |
| 1505.1499 | 1506.6200 | 1509.6206 |
| 1511.9987 | 1526.6674 | 1532.2378 |
| 1544.2859 | 1624.1482 | 1672.0651 |
| 1677.0716 | 1684.4568 | 1688.6997 |
| 1692.8933 | 3050.1500 | 3051.8575 |
| 3054.4970 | 3056.3675 | 3058.6065 |
| 3060.0372 | 3064.7433 | 3065.5332 |
| 3069.9218 | 3099.6531 | 3100.3954 |
| 3105.6038 | 3110.3659 | 3117.3942 |
| 3119.2618 | 3136.9063 | 3138.2842 |
| 3138.7498 | 3144.2744 | 3145.3699 |
| 3145.7441 | 3153.2976 | 3153.8153 |
| 3154.6473 | 3202.2913 | 3207.3671 |
| 3212.8520 | 3214.9701 | 3216.1443 |
| 3224.5082 | 3228.6969 | 3236.1922 |

## <sup>2</sup>TS8

|                                              |             |
|----------------------------------------------|-------------|
| Zero-point correction=                       | 0.128531    |
| Thermal correction to Energy=                | 0.137575    |
| Thermal correction to Enthalpy=              | 0.138519    |
| Thermal correction to Gibbs Free Energy=     | 0.093189    |
| Sum of electronic and zero-point Energies=   | -455.239550 |
| Sum of electronic and thermal Energies=      | -455.230506 |
| Sum of electronic and thermal Enthalpies=    | -455.229562 |
| Sum of electronic and thermal Free Energies= | -455.274891 |

## Cartesian coordinates

|   |             |             |             |
|---|-------------|-------------|-------------|
| N | 1.27145600  | -0.00001700 | -0.84756200 |
| C | 0.61837600  | 1.17130800  | -0.65276100 |
| C | -0.70732300 | 1.21048500  | -0.27796900 |
| H | -1.20811300 | 2.16275400  | -0.15102300 |
| C | -1.39180500 | -0.00000200 | -0.08392000 |
| C | -0.70732700 | -1.21049700 | -0.27793500 |
| H | -1.20812000 | -2.16276000 | -0.15096200 |
| C | 0.61837300  | -1.17133500 | -0.65272700 |
| H | 1.20249800  | -2.07067500 | -0.81280300 |
| H | 1.20250300  | 2.07064200  | -0.81286400 |
| O | 2.77994100  | -0.00000500 | -0.00765000 |
| C | 2.47415500  | 0.00003000  | 1.36185500  |

|   |             |             |            |
|---|-------------|-------------|------------|
| H | 3.43637200  | 0.00003700  | 1.88688600 |
| H | 1.91525900  | 0.89478700  | 1.67079500 |
| H | 1.91524700  | -0.89470300 | 1.67084000 |
| C | -2.77057600 | 0.00000600  | 0.30695400 |
| N | -3.88551500 | 0.00001400  | 0.62175400 |

Vibrational frequencies

|           |           |           |
|-----------|-----------|-----------|
| -691.5895 | 71.4780   | 72.2214   |
| 155.1529  | 172.5103  | 188.3344  |
| 265.8597  | 334.6700  | 398.1596  |
| 431.9373  | 462.3451  | 566.5707  |
| 576.3721  | 666.3358  | 726.3769  |
| 763.9348  | 840.8245  | 862.4250  |
| 940.5061  | 981.3443  | 987.8000  |
| 1055.5618 | 1072.1160 | 1130.3988 |
| 1177.9772 | 1189.8189 | 1202.8364 |
| 1249.4733 | 1296.3158 | 1339.8444 |
| 1452.4270 | 1465.5497 | 1472.7614 |
| 1500.8701 | 1522.4701 | 1582.8639 |
| 1647.1281 | 2407.8268 | 3018.5801 |
| 3085.2252 | 3112.4692 | 3231.1551 |
| 3231.7952 | 3253.7294 | 3254.1860 |

<sup>2</sup>M12

|                                              |             |
|----------------------------------------------|-------------|
| Zero-point correction=                       | 0.037680    |
| Thermal correction to Energy=                | 0.040637    |
| Thermal correction to Enthalpy=              | 0.041581    |
| Thermal correction to Gibbs Free Energy=     | 0.014762    |
| Sum of electronic and zero-point Energies=   | -114.958153 |
| Sum of electronic and thermal Energies=      | -114.955196 |
| Sum of electronic and thermal Enthalpies=    | -114.954252 |
| Sum of electronic and thermal Free Energies= | -114.981071 |

Cartesian coordinates

|   |             |             |             |
|---|-------------|-------------|-------------|
| O | -0.79413300 | -0.00004800 | -0.00763000 |
| C | 0.57843500  | -0.00020000 | -0.01225700 |
| H | 0.87146200  | 0.00768200  | 1.05390700  |
| H | 1.00559500  | -0.90989400 | -0.45364300 |
| H | 1.00540000  | 0.90379600  | -0.46568100 |

Vibrational frequencies

|           |           |           |
|-----------|-----------|-----------|
| 959.0747  | 974.1287  | 1143.4229 |
| 1388.8514 | 1400.5957 | 1528.8259 |
| 2980.9515 | 3058.2629 | 3105.4504 |

**M13**

|                                              |             |
|----------------------------------------------|-------------|
| Zero-point correction=                       | 0.088470    |
| Thermal correction to Energy=                | 0.094425    |
| Thermal correction to Enthalpy=              | 0.095369    |
| Thermal correction to Gibbs Free Energy=     | 0.058247    |
| Sum of electronic and zero-point Energies=   | -340.308361 |
| Sum of electronic and thermal Energies=      | -340.302406 |
| Sum of electronic and thermal Enthalpies=    | -340.301462 |
| Sum of electronic and thermal Free Energies= | -340.338584 |

## Cartesian coordinates

|   |             |             |             |
|---|-------------|-------------|-------------|
| N | 2.19219000  | 0.00000200  | 0.00016300  |
| C | 1.50150200  | -1.14318900 | 0.00010300  |
| C | 0.11171000  | -1.20572500 | -0.00018600 |
| H | -0.40508100 | -2.15767000 | -0.00001200 |
| C | -0.59041800 | -0.00000200 | -0.00067300 |
| C | 0.11170700  | 1.20572300  | -0.00018600 |
| H | -0.40508800 | 2.15766700  | -0.00001200 |
| C | 1.50149900  | 1.14319200  | 0.00010300  |
| H | 2.08312400  | 2.06076100  | 0.00040300  |
| H | 2.08313000  | -2.06075700 | 0.00040300  |
| C | -2.03237000 | -0.00000400 | 0.00025200  |
| N | -3.18902700 | 0.00000200  | 0.00022800  |

## Vibrational frequencies

|           |           |           |
|-----------|-----------|-----------|
| 146.9673  | 164.0258  | 386.6537  |
| 396.7375  | 456.8321  | 573.9450  |
| 593.2823  | 683.1700  | 757.3210  |
| 786.8252  | 854.1008  | 901.9372  |
| 1009.5588 | 1023.3368 | 1031.5112 |
| 1105.1081 | 1125.4085 | 1232.9884 |
| 1258.9248 | 1288.5501 | 1361.8337 |
| 1463.7007 | 1551.0055 | 1653.6055 |
| 1688.3358 | 2417.1263 | 3215.8429 |
| 3218.6979 | 3242.8707 | 3243.5009 |

**TEMPOH(R4)**

|                                            |             |
|--------------------------------------------|-------------|
| Zero-point correction=                     | 0.276134    |
| Thermal correction to Energy=              | 0.288222    |
| Thermal correction to Enthalpy=            | 0.289166    |
| Thermal correction to Gibbs Free Energy=   | 0.240265    |
| Sum of electronic and zero-point Energies= | -483.845959 |
| Sum of electronic and thermal Energies=    | -483.833871 |

Sum of electronic and thermal Enthalpies= -483.832927  
Sum of electronic and thermal Free Energies= -483.881828

Cartesian coordinates

|   |           |           |           |
|---|-----------|-----------|-----------|
| C | -1.270974 | -0.060908 | 0.054007  |
| C | -1.107985 | 1.409686  | 0.487042  |
| C | -0.072774 | 2.125250  | -0.371383 |
| C | 1.312097  | 1.512295  | -0.134783 |
| C | 1.282470  | -0.031459 | 0.047994  |
| H | -2.086724 | 1.897821  | 0.425485  |
| H | -0.347579 | 2.031668  | -1.427587 |
| H | 1.971068  | 1.769736  | -0.970379 |
| H | -0.051628 | 3.194757  | -0.141707 |
| H | -0.799025 | 1.459421  | 1.538913  |
| H | 1.758452  | 1.952634  | 0.764352  |
| N | 0.013437  | -0.513599 | -0.546830 |
| O | 0.010653  | -1.938014 | -0.530556 |
| C | -2.309470 | -0.164861 | -1.069006 |
| H | -2.325506 | -1.184819 | -1.463910 |
| H | -3.308967 | 0.076768  | -0.694236 |
| H | -2.066489 | 0.518595  | -1.887759 |
| C | -1.756584 | -0.906948 | 1.239313  |
| H | -1.022954 | -0.947703 | 2.045931  |
| H | -2.672132 | -0.458053 | 1.638410  |
| H | -1.982631 | -1.927280 | 0.924666  |
| C | 2.422901  | -0.647770 | -0.768290 |
| H | 3.369066  | -0.176187 | -0.486418 |
| H | 2.505453  | -1.722188 | -0.589924 |
| H | 2.255761  | -0.475751 | -1.836273 |
| C | 1.479736  | -0.427355 | 1.520159  |
| H | 1.295964  | -1.497838 | 1.649961  |
| H | 2.511247  | -0.216077 | 1.820397  |
| H | 0.822555  | 0.129691  | 2.192167  |
| H | 0.118282  | -2.173463 | -1.460148 |

Vibrational frequencies

|          |          |          |
|----------|----------|----------|
| 93.7147  | 115.7975 | 173.0030 |
| 229.3457 | 242.1588 | 269.7976 |
| 279.3626 | 290.4709 | 310.7024 |
| 329.1856 | 345.2190 | 354.8956 |
| 371.6426 | 380.0955 | 398.2876 |
| 412.0708 | 462.4023 | 484.8174 |
| 520.1766 | 581.1177 | 606.6970 |
| 680.4653 | 806.3875 | 814.6556 |

|           |           |           |
|-----------|-----------|-----------|
| 853.2908  | 902.6304  | 934.8947  |
| 938.4593  | 944.1268  | 982.5015  |
| 991.6837  | 1001.8519 | 1016.0213 |
| 1052.2688 | 1075.9275 | 1082.0005 |
| 1093.4395 | 1125.6846 | 1186.8777 |
| 1223.2494 | 1233.4028 | 1252.7300 |
| 1276.2751 | 1285.3321 | 1301.2101 |
| 1332.3998 | 1363.9622 | 1375.4380 |
| 1384.9008 | 1391.0545 | 1400.1620 |
| 1401.1899 | 1409.6839 | 1414.7097 |
| 1480.1322 | 1487.6240 | 1490.1283 |
| 1492.3478 | 1497.1999 | 1499.2980 |
| 1505.0077 | 1508.0815 | 1514.5713 |
| 1518.9916 | 1522.4805 | 3058.0914 |
| 3060.5891 | 3062.7855 | 3065.0052 |
| 3068.9084 | 3075.2037 | 3076.0742 |
| 3109.0898 | 3113.9916 | 3125.8325 |
| 3141.2736 | 3143.0630 | 3145.0246 |
| 3146.3175 | 3154.5931 | 3159.2998 |
| 3162.9783 | 3183.0056 | 3861.9773 |

## R5

|                                              |             |             |
|----------------------------------------------|-------------|-------------|
| Zero-point correction=                       | 0.110593    |             |
| Thermal correction to Energy=                | 0.120942    |             |
| Thermal correction to Enthalpy=              | 0.121886    |             |
| Thermal correction to Gibbs Free Energy=     |             | 0.073157    |
| Sum of electronic and zero-point Energies=   |             | -752.772573 |
| Sum of electronic and thermal Energies=      | -752.762224 |             |
| Sum of electronic and thermal Enthalpies=    |             | -752.761280 |
| Sum of electronic and thermal Free Energies= |             | -752.810010 |

## Cartesian coordinates

|   |           |           |           |
|---|-----------|-----------|-----------|
| N | -0.241721 | -0.000064 | -0.584183 |
| C | 0.366339  | -1.194131 | -0.465884 |
| C | 1.714815  | -1.215320 | -0.176918 |
| H | 2.221618  | -2.166089 | -0.075855 |
| C | 2.389041  | 0.000005  | -0.027385 |
| C | 1.714766  | 1.215289  | -0.176972 |
| H | 2.221515  | 2.166093  | -0.075963 |
| C | 0.366282  | 1.194015  | -0.465928 |
| H | -0.250895 | 2.070371  | -0.617756 |
| H | -0.250781 | -2.070529 | -0.617693 |
| C | 3.797811  | 0.000029  | 0.273103  |
| N | 4.926778  | 0.000074  | 0.517099  |



|   |           |           |           |
|---|-----------|-----------|-----------|
| O | -1.569705 | -0.000035 | -0.933387 |
| C | -2.404563 | 0.000028  | 0.201273  |
| F | -2.181077 | -1.073982 | 0.935144  |
| F | -3.620532 | -0.000182 | -0.274837 |
| F | -2.181298 | 1.074261  | 0.934828  |

#### Vibrational frequencies

|           |           |           |
|-----------|-----------|-----------|
| 55.9108   | 56.9760   | 77.6259   |
| 144.9636  | 157.4730  | 282.9302  |
| 318.5902  | 333.0457  | 409.3225  |
| 432.3167  | 487.7387  | 494.4985  |
| 568.0842  | 571.3041  | 578.3319  |
| 624.0742  | 685.0716  | 692.9267  |
| 735.5604  | 787.8489  | 848.5099  |
| 863.3615  | 895.5118  | 946.0463  |
| 990.4773  | 1001.8404 | 1074.2014 |
| 1146.4640 | 1183.9720 | 1217.7268 |
| 1241.1924 | 1275.9135 | 1317.1812 |
| 1323.7556 | 1343.9996 | 1402.4893 |
| 1496.8626 | 1551.3593 | 1651.3933 |
| 1714.2352 | 2442.6815 | 3272.8369 |
| 3273.5895 | 3286.5128 | 3288.1446 |

#### M14

|                                              |              |              |
|----------------------------------------------|--------------|--------------|
| Zero-point correction=                       | 0.473584     |              |
| Thermal correction to Energy=                | 0.505273     |              |
| Thermal correction to Enthalpy=              | 0.506217     |              |
| Thermal correction to Gibbs Free Energy=     | 0.410003     |              |
| Sum of electronic and zero-point Energies=   |              | -1579.631792 |
| Sum of electronic and thermal Energies=      | -1579.600102 |              |
| Sum of electronic and thermal Enthalpies=    |              | -1579.599158 |
| Sum of electronic and thermal Free Energies= |              | -1579.695372 |

#### Cartesian coordinates

|   |           |           |           |
|---|-----------|-----------|-----------|
| H | 1.019556  | 2.724570  | -2.274325 |
| C | 0.753620  | 2.015003  | -0.541643 |
| O | 1.344846  | 2.935103  | -1.389022 |
| O | 0.054539  | 1.131297  | -1.114061 |
| O | 1.011548  | 2.148903  | 0.660879  |
| H | -1.131569 | 0.215872  | -0.168655 |
| C | 0.952064  | -1.523876 | 1.446157  |
| C | 0.506831  | -2.163103 | 0.286924  |
| C | 1.970338  | -0.811863 | -1.049117 |
| C | -3.342185 | 0.952520  | 1.095861  |

|   |           |           |           |
|---|-----------|-----------|-----------|
| C | -4.794079 | 1.362864  | 0.775182  |
| C | -5.623390 | 0.156373  | 0.351072  |
| C | -5.091077 | -0.413772 | -0.970030 |
| C | -3.543086 | -0.336752 | -1.095644 |
| H | -5.219875 | 1.847523  | 1.660870  |
| H | -5.569579 | -0.608799 | 1.132962  |
| H | -5.413967 | -1.455585 | -1.069871 |
| H | -6.678037 | 0.428381  | 0.244112  |
| H | -4.807774 | 2.112100  | -0.025872 |
| H | -5.530202 | 0.132886  | -1.812742 |
| N | -3.012676 | -0.245380 | 0.282183  |
| O | -1.624998 | -0.487030 | 0.326805  |
| C | -3.243489 | 0.502794  | 2.558799  |
| H | -2.256248 | 0.071264  | 2.743859  |
| H | -3.388635 | 1.351578  | 3.234701  |
| H | -3.999778 | -0.256154 | 2.781097  |
| C | -2.393655 | 2.142130  | 0.890068  |
| H | -2.339861 | 2.449813  | -0.156889 |
| H | -2.763111 | 2.991932  | 1.474231  |
| H | -1.379037 | 1.911423  | 1.224889  |
| C | -3.028736 | -1.649014 | -1.694364 |
| H | -3.547231 | -1.846508 | -2.637854 |
| H | -1.954068 | -1.600594 | -1.890351 |
| H | -3.218765 | -2.476479 | -1.005317 |
| C | -3.126869 | 0.809472  | -2.037870 |
| H | -2.043466 | 0.961559  | -2.021141 |
| H | -3.423853 | 0.556474  | -3.061551 |
| H | -3.616358 | 1.752481  | -1.781820 |
| C | 1.940950  | -0.566593 | 1.365346  |
| H | 0.518367  | -1.750004 | 2.411235  |
| C | 2.449764  | -0.270156 | -2.355402 |
| H | 1.645877  | -0.396253 | -3.079015 |
| H | 2.685797  | 0.790481  | -2.264671 |
| H | 3.331239  | -0.810488 | -2.704809 |
| C | 1.006838  | -1.806617 | -0.956365 |
| N | 2.447355  | -0.319346 | 0.121630  |
| O | 3.416800  | 0.658648  | 0.047571  |
| H | 0.625931  | -2.247072 | -1.868818 |
| C | 4.710467  | 0.128409  | 0.061135  |
| C | 2.438907  | 0.216896  | 2.531672  |
| H | 2.384942  | 1.277469  | 2.278434  |
| H | 1.798943  | 0.005964  | 3.387011  |
| H | 3.465162  | -0.050475 | 2.785945  |
| C | -0.517877 | -3.171749 | 0.386978  |

|   |           |           |           |
|---|-----------|-----------|-----------|
| N | -1.316602 | -4.001890 | 0.476590  |
| F | 5.506611  | 1.167996  | 0.092754  |
| F | 4.903879  | -0.640791 | 1.120393  |
| F | 4.945639  | -0.599450 | -1.018527 |

Vibrational frequencies

|           |           |           |
|-----------|-----------|-----------|
| 17.1607   | 25.0242   | 31.9920   |
| 43.2700   | 44.9124   | 53.9556   |
| 57.1608   | 65.2585   | 71.9671   |
| 84.5849   | 99.4582   | 108.7000  |
| 116.8675  | 119.4475  | 130.9237  |
| 148.8812  | 165.9425  | 176.5169  |
| 183.1268  | 190.2346  | 204.4999  |
| 219.7382  | 220.0267  | 247.8414  |
| 248.8886  | 264.9318  | 285.4488  |
| 290.5944  | 294.5321  | 297.2653  |
| 313.9352  | 320.7043  | 333.5756  |
| 339.9728  | 348.0822  | 361.5448  |
| 368.5490  | 382.5161  | 401.1493  |
| 407.7264  | 435.2866  | 442.8867  |
| 467.6531  | 486.2678  | 489.3152  |
| 494.3160  | 524.6239  | 528.2091  |
| 556.7167  | 564.3317  | 580.8873  |
| 592.4890  | 606.0644  | 607.8300  |
| 609.3878  | 613.6001  | 626.2507  |
| 666.4068  | 669.1818  | 675.6711  |
| 691.1097  | 735.7311  | 799.1293  |
| 815.2705  | 825.4332  | 838.4435  |
| 848.0132  | 849.3461  | 900.3587  |
| 900.5829  | 911.0921  | 936.2691  |
| 940.2427  | 941.3713  | 948.9157  |
| 982.2599  | 982.9458  | 990.6653  |
| 995.6007  | 1004.2771 | 1021.7910 |
| 1026.6484 | 1046.9402 | 1052.0632 |
| 1065.9689 | 1068.1358 | 1077.4864 |
| 1084.3947 | 1087.3013 | 1103.0799 |
| 1140.0408 | 1181.3666 | 1187.7747 |
| 1210.2766 | 1223.6974 | 1232.0870 |
| 1238.0558 | 1251.9384 | 1255.2779 |
| 1273.5180 | 1280.6202 | 1286.3441 |
| 1290.5680 | 1301.7365 | 1310.9589 |
| 1328.2937 | 1368.3598 | 1370.5119 |
| 1379.2307 | 1389.3861 | 1389.5107 |
| 1399.0649 | 1400.9743 | 1404.6823 |

|           |           |           |
|-----------|-----------|-----------|
| 1410.8709 | 1418.7248 | 1422.8305 |
| 1424.5719 | 1456.9527 | 1464.1710 |
| 1477.6817 | 1478.7531 | 1481.8038 |
| 1482.0632 | 1487.9394 | 1490.1693 |
| 1495.4792 | 1500.8130 | 1502.1973 |
| 1506.8017 | 1508.8464 | 1515.8284 |
| 1523.3504 | 1524.9463 | 1525.9099 |
| 1528.1660 | 1653.5505 | 1719.5363 |
| 1788.2150 | 2440.8381 | 3057.5985 |
| 3059.5007 | 3060.6818 | 3062.2775 |
| 3065.1081 | 3068.3867 | 3074.7254 |
| 3102.8451 | 3103.7852 | 3106.4188 |
| 3106.4393 | 3123.6754 | 3137.5696 |
| 3141.7228 | 3142.8948 | 3148.6583 |
| 3155.0297 | 3158.1324 | 3161.4019 |
| 3175.3511 | 3190.0189 | 3199.3501 |
| 3206.8953 | 3208.5594 | 3263.6022 |
| 3265.6277 | 3350.2741 | 3862.2562 |

#### <sup>os</sup>TS9

|                                              |              |              |
|----------------------------------------------|--------------|--------------|
| Zero-point correction=                       | 0.468237     |              |
| Thermal correction to Energy=                | 0.499469     |              |
| Thermal correction to Enthalpy=              | 0.500413     |              |
| Thermal correction to Gibbs Free Energy=     |              | 0.406399     |
| Sum of electronic and zero-point Energies=   |              | -1579.617740 |
| Sum of electronic and thermal Energies=      | -1579.586508 |              |
| Sum of electronic and thermal Enthalpies=    |              | -1579.585564 |
| Sum of electronic and thermal Free Energies= |              | -1579.679578 |

#### Cartesian coordinates

|   |           |           |           |
|---|-----------|-----------|-----------|
| H | 1.350988  | 3.611426  | 0.151435  |
| C | 0.810149  | 2.019331  | 1.021823  |
| O | 1.645572  | 3.076662  | 0.902486  |
| O | -0.087461 | 1.978174  | 0.076432  |
| O | 0.964400  | 1.232076  | 1.936337  |
| H | -0.716218 | 1.064039  | 0.115590  |
| C | 0.755881  | -1.944032 | 0.320232  |
| C | 0.110773  | -1.570087 | -0.883582 |
| C | 1.862086  | 0.038422  | -1.312598 |
| C | -3.355157 | -0.400884 | 1.294253  |
| C | -4.881442 | -0.290698 | 1.121636  |
| C | -5.291644 | -0.682838 | -0.294186 |
| C | -4.747291 | 0.330871  | -1.308020 |
| C | -3.332192 | 0.862106  | -0.948255 |

|   |           |           |           |
|---|-----------|-----------|-----------|
| H | -5.361437 | -0.932893 | 1.867836  |
| H | -4.889204 | -1.676138 | -0.519483 |
| H | -4.719491 | -0.130971 | -2.300774 |
| H | -6.380451 | -0.748262 | -0.379495 |
| H | -5.216221 | 0.732757  | 1.330165  |
| H | -5.427215 | 1.187920  | -1.377581 |
| N | -2.719367 | -0.098357 | -0.008043 |
| O | -1.383413 | -0.070122 | 0.078416  |
| C | -2.970347 | -1.841662 | 1.649456  |
| H | -1.881356 | -1.935145 | 1.661598  |
| H | -3.358093 | -2.102429 | 2.638797  |
| H | -3.367369 | -2.541938 | 0.910106  |
| C | -2.845830 | 0.533364  | 2.401612  |
| H | -3.115995 | 1.573901  | 2.205570  |
| H | -3.286846 | 0.243404  | 3.360728  |
| H | -1.757105 | 0.464919  | 2.477121  |
| C | -2.467708 | 0.900603  | -2.210774 |
| H | -2.986714 | 1.481933  | -2.978623 |
| H | -1.497327 | 1.366313  | -2.018761 |
| H | -2.312019 | -0.115284 | -2.585846 |
| C | -3.410829 | 2.292656  | -0.377176 |
| H | -2.432516 | 2.615669  | -0.010535 |
| H | -3.725416 | 2.980844  | -1.168957 |
| H | -4.137351 | 2.372491  | 0.434585  |
| C | 1.898495  | -1.313782 | 0.722592  |
| H | 0.306131  | -2.673970 | 0.980774  |
| C | 2.432261  | 1.222420  | -2.028458 |
| H | 1.668426  | 1.617275  | -2.697107 |
| H | 2.710318  | 1.996814  | -1.310182 |
| H | 3.314768  | 0.962161  | -2.613882 |
| C | 0.727665  | -0.605925 | -1.716190 |
| N | 2.453686  | -0.396074 | -0.143566 |
| O | 3.535206  | 0.323978  | 0.328693  |
| H | 0.245904  | -0.284267 | -2.630534 |
| C | 4.750377  | -0.206799 | -0.083900 |
| C | 2.523070  | -1.507589 | 2.065385  |
| H | 2.589711  | -0.537035 | 2.562725  |
| H | 1.886615  | -2.167583 | 2.653009  |
| H | 3.519935  | -1.943296 | 1.999663  |
| C | -1.075582 | -2.234843 | -1.305584 |
| N | -2.075481 | -2.727579 | -1.629858 |
| F | 5.669369  | 0.529755  | 0.498406  |
| F | 4.884502  | -1.475523 | 0.276418  |
| F | 4.891998  | -0.149626 | -1.401067 |

Vibrational frequencies

|            |           |           |
|------------|-----------|-----------|
| -1543.9866 | 26.3889   | 29.9522   |
| 36.2297    | 41.8323   | 53.3431   |
| 53.8359    | 67.1511   | 73.2721   |
| 88.4226    | 91.1124   | 107.0595  |
| 119.6110   | 124.5895  | 136.8262  |
| 139.6154   | 146.4078  | 149.9023  |
| 180.1906   | 183.8426  | 199.8661  |
| 205.7566   | 215.5484  | 226.8301  |
| 244.8879   | 273.9416  | 277.3322  |
| 285.1687   | 290.4257  | 298.7460  |
| 306.3387   | 322.6172  | 335.7191  |
| 347.0696   | 353.3637  | 356.6196  |
| 371.0367   | 383.7146  | 407.2964  |
| 412.5004   | 430.0704  | 436.1903  |
| 444.8379   | 469.9487  | 485.1580  |
| 487.6364   | 491.7259  | 536.1887  |
| 538.9745   | 547.2791  | 554.3772  |
| 563.1145   | 571.8918  | 574.3605  |
| 597.7701   | 611.1155  | 612.3163  |
| 624.3045   | 652.9211  | 660.3214  |
| 665.4610   | 700.9633  | 749.7111  |
| 813.2433   | 819.0188  | 824.0517  |
| 835.9256   | 858.1259  | 875.5359  |
| 898.3267   | 901.4198  | 935.9716  |
| 940.8137   | 941.6973  | 952.3787  |
| 961.8848   | 980.6290  | 985.8927  |
| 993.4392   | 1003.2834 | 1033.8619 |
| 1036.7011  | 1043.8241 | 1060.0732 |
| 1066.0055  | 1068.4037 | 1072.3570 |
| 1089.6974  | 1091.1000 | 1116.5520 |
| 1168.7647  | 1184.4497 | 1210.5101 |
| 1223.9078  | 1227.5634 | 1234.0676 |
| 1250.4757  | 1256.9715 | 1264.7083 |
| 1268.2416  | 1269.8051 | 1275.9877 |
| 1300.1470  | 1307.8784 | 1324.0516 |
| 1338.7520  | 1361.4120 | 1363.7676 |
| 1372.1541  | 1374.7886 | 1383.5052 |
| 1390.3708  | 1396.1698 | 1402.9493 |
| 1408.1820  | 1413.9473 | 1419.0291 |
| 1427.0164  | 1447.7321 | 1469.8723 |
| 1475.5695  | 1480.5113 | 1486.6006 |
| 1488.7635  | 1490.0724 | 1493.0290 |

|           |           |           |
|-----------|-----------|-----------|
| 1496.7294 | 1499.5927 | 1500.3105 |
| 1506.1439 | 1508.1639 | 1508.8360 |
| 1516.3862 | 1518.0907 | 1521.8935 |
| 1525.4846 | 1568.1672 | 1613.2903 |
| 1720.9340 | 1892.8457 | 2367.1380 |
| 3062.7256 | 3063.9042 | 3065.6521 |
| 3066.7336 | 3068.5357 | 3070.9424 |
| 3083.6621 | 3099.2961 | 3102.8376 |
| 3109.5750 | 3112.1650 | 3133.5366 |
| 3143.3268 | 3148.5990 | 3151.2190 |
| 3154.4385 | 3162.9682 | 3167.4829 |
| 3167.8135 | 3171.9212 | 3183.4248 |
| 3189.1739 | 3200.6712 | 3206.1090 |
| 3252.3732 | 3255.1797 | 3851.1032 |

## <sup>2</sup>M15

|                                              |             |
|----------------------------------------------|-------------|
| Zero-point correction=                       | 0.164289    |
| Thermal correction to Energy=                | 0.177941    |
| Thermal correction to Enthalpy=              | 0.178885    |
| Thermal correction to Gibbs Free Energy=     | 0.121982    |
| Sum of electronic and zero-point Energies=   | -831.477358 |
| Sum of electronic and thermal Energies=      | -831.463706 |
| Sum of electronic and thermal Enthalpies=    | -831.462762 |
| Sum of electronic and thermal Free Energies= | -831.519665 |

## Cartesian coordinates

|   |             |             |             |
|---|-------------|-------------|-------------|
| N | 0.16448300  | 0.00017500  | -0.04399200 |
| C | -0.52714500 | 1.22758600  | -0.14863200 |
| C | -1.88415900 | 1.21607500  | -0.05208100 |
| H | -2.40631300 | 2.16563700  | -0.05781700 |
| C | -2.61312000 | 0.00000300  | 0.04233500  |
| C | -1.88402000 | -1.21601500 | -0.05177700 |
| H | -2.40606900 | -2.16563700 | -0.05737900 |
| C | -0.52701200 | -1.22737400 | -0.14832100 |
| C | -4.02261300 | -0.00007600 | 0.15711200  |
| N | -5.18262500 | -0.00029500 | 0.25726300  |
| O | 1.39577500  | -0.00006800 | -0.74197400 |
| C | 2.46742800  | -0.00006000 | 0.11564100  |
| F | 2.49065300  | 1.07227600  | 0.89995800  |
| F | 3.54260400  | -0.00505800 | -0.65130000 |
| F | 2.48524700  | -1.06748000 | 0.90667300  |
| C | 0.27033500  | 2.48573900  | -0.28392200 |
| H | 0.84346300  | 2.69379100  | 0.62240900  |
| H | 0.97235900  | 2.42491800  | -1.11880000 |

|   |             |             |             |
|---|-------------|-------------|-------------|
| H | -0.41380900 | 3.31493600  | -0.46222800 |
| C | 0.27060400  | -2.48541500 | -0.28400600 |
| H | 0.84468600  | -2.69327000 | 0.62175000  |
| H | -0.41356200 | -3.31478000 | -0.46145600 |
| H | 0.97171800  | -2.42464200 | -1.11967000 |

Vibrational frequencies

|           |           |           |
|-----------|-----------|-----------|
| 22.2224   | 30.3290   | 103.4892  |
| 113.8517  | 141.0198  | 149.7697  |
| 191.6523  | 243.8799  | 268.6099  |
| 270.6559  | 291.0396  | 312.9977  |
| 354.6519  | 410.9756  | 442.8122  |
| 481.3790  | 481.6561  | 519.6323  |
| 544.6532  | 550.6247  | 555.8824  |
| 585.5561  | 614.0603  | 651.5822  |
| 654.5666  | 696.2053  | 798.9794  |
| 878.2457  | 886.0582  | 937.6963  |
| 962.0395  | 968.4527  | 1039.7873 |
| 1057.3720 | 1059.3892 | 1064.4203 |
| 1127.6113 | 1172.3556 | 1259.9632 |
| 1265.4386 | 1286.6803 | 1320.0002 |
| 1332.2665 | 1350.1006 | 1420.6233 |
| 1421.7599 | 1422.9562 | 1440.2121 |
| 1482.4613 | 1483.1573 | 1499.7123 |
| 1506.7672 | 1590.3935 | 1726.4551 |
| 2328.7380 | 3087.7389 | 3088.0757 |
| 3162.8313 | 3162.9292 | 3187.5620 |
| 3187.6726 | 3231.7050 | 3232.1273 |

**<sup>2</sup>M16**

|                                              |             |
|----------------------------------------------|-------------|
| Zero-point correction=                       | 0.264354    |
| Thermal correction to Energy=                | 0.276309    |
| Thermal correction to Enthalpy=              | 0.277253    |
| Thermal correction to Gibbs Free Energy=     | 0.226748    |
| Sum of electronic and zero-point Energies=   | -483.247034 |
| Sum of electronic and thermal Energies=      | -483.235080 |
| Sum of electronic and thermal Enthalpies=    | -483.234136 |
| Sum of electronic and thermal Free Energies= | -483.284641 |

Cartesian coordinates

|   |             |             |             |
|---|-------------|-------------|-------------|
| C | -1.30575500 | -0.07558300 | 0.07380900  |
| C | -1.11291100 | 1.38440200  | 0.50713000  |
| C | -0.07169900 | 2.07183200  | -0.36709400 |
| C | 1.31039600  | 1.48362500  | -0.08218800 |



|   |             |             |             |
|---|-------------|-------------|-------------|
| C | 1.31982800  | -0.06394600 | 0.05454400  |
| H | -2.08423500 | 1.88610200  | 0.45083700  |
| H | -0.32846500 | 1.93302100  | -1.42346200 |
| H | 2.00758400  | 1.78229500  | -0.87074400 |
| H | -0.05777000 | 3.14954700  | -0.18344700 |
| H | -0.79410600 | 1.42940400  | 1.55657100  |
| H | 1.69265800  | 1.90896400  | 0.85246200  |
| N | 0.00616500  | -0.63365300 | -0.36391800 |
| O | -0.00643900 | -1.85408600 | -0.73432600 |
| C | -2.24699600 | -0.16171700 | -1.13197100 |
| H | -2.27919400 | -1.18840200 | -1.50089500 |
| H | -3.25386200 | 0.14242300  | -0.83408300 |
| H | -1.91189500 | 0.48961800  | -1.94398500 |
| C | -1.86219000 | -0.92923100 | 1.21683000  |
| H | -1.19806600 | -0.91190500 | 2.08495200  |
| H | -2.83689400 | -0.53823800 | 1.52303000  |
| H | -1.98305500 | -1.96298600 | 0.88608000  |
| C | 2.39006000  | -0.65863600 | -0.85957100 |
| H | 3.35260700  | -0.20301700 | -0.61194000 |
| H | 2.46305400  | -1.73894700 | -0.73454400 |
| H | 2.16020200  | -0.43930900 | -1.90614200 |
| C | 1.59015300  | -0.49488800 | 1.50388500  |
| H | 1.48742400  | -1.58032100 | 1.59399600  |
| H | 2.60762200  | -0.21118200 | 1.78918900  |
| H | 0.89943200  | -0.01396900 | 2.20191800  |

#### Vibrational frequencies

|           |           |           |
|-----------|-----------|-----------|
| 24.8292   | 95.9958   | 190.2531  |
| 222.2025  | 239.7165  | 259.3434  |
| 272.0343  | 286.9597  | 307.0189  |
| 322.5372  | 332.5900  | 352.0129  |
| 386.8087  | 401.8220  | 407.5099  |
| 448.5373  | 481.2821  | 542.6958  |
| 560.5976  | 597.6460  | 648.8842  |
| 816.6022  | 817.9164  | 857.7967  |
| 906.2297  | 943.8143  | 948.3823  |
| 949.1861  | 990.1343  | 996.0447  |
| 1008.0300 | 1023.7004 | 1055.9151 |
| 1091.7911 | 1095.0733 | 1120.0459 |
| 1179.8161 | 1217.1444 | 1225.5851 |
| 1253.0337 | 1267.9000 | 1284.0104 |
| 1303.3266 | 1331.2778 | 1375.2010 |
| 1387.6105 | 1395.9856 | 1399.1962 |
| 1402.5181 | 1412.2923 | 1416.5444 |

|           |           |           |
|-----------|-----------|-----------|
| 1479.0222 | 1484.7004 | 1490.4439 |
| 1491.8650 | 1495.8937 | 1497.1450 |
| 1501.6379 | 1504.9133 | 1506.7697 |
| 1514.3432 | 1516.3933 | 1521.1945 |
| 3062.8551 | 3067.6094 | 3070.5938 |
| 3073.4626 | 3074.5334 | 3077.0880 |
| 3078.7401 | 3117.6675 | 3120.2250 |
| 3129.0691 | 3151.7616 | 3153.2064 |
| 3156.0047 | 3157.5513 | 3161.0249 |
| 3168.8948 | 3174.2672 | 3185.9330 |

## <sup>2</sup>TS10

|                                              |             |
|----------------------------------------------|-------------|
| Zero-point correction=                       | 0.162741    |
| Thermal correction to Energy=                | 0.175913    |
| Thermal correction to Enthalpy=              | 0.176857    |
| Thermal correction to Gibbs Free Energy=     | 0.121822    |
| Sum of electronic and zero-point Energies=   | -831.476397 |
| Sum of electronic and thermal Energies=      | -831.463225 |
| Sum of electronic and thermal Enthalpies=    | -831.462281 |
| Sum of electronic and thermal Free Energies= | -831.517316 |

## Cartesian coordinates

|   |             |             |             |
|---|-------------|-------------|-------------|
| N | -0.12758200 | 0.00034200  | -0.24821400 |
| C | 0.55749700  | 1.20932300  | -0.15432200 |
| C | 1.92404500  | 1.20925800  | -0.03485100 |
| H | 2.44610100  | 2.15886400  | -0.01482700 |
| C | 2.63969800  | -0.00017700 | 0.03226400  |
| C | 1.92354700  | -1.20934900 | -0.03416900 |
| H | 2.44521400  | -2.15916200 | -0.01376700 |
| C | 0.55705200  | -1.20888200 | -0.15427100 |
| C | 4.06001200  | -0.00043100 | 0.16119800  |
| N | 5.21541200  | -0.00064300 | 0.26661400  |
| O | -1.31070200 | 0.00078800  | 0.78213400  |
| C | -2.50380600 | -0.00004000 | 0.14938700  |
| F | -2.69060600 | 1.07030400  | -0.62860100 |
| F | -3.44552000 | 0.00036700  | 1.09001300  |
| F | -2.68994000 | -1.07171900 | -0.62692400 |
| C | -0.24032000 | -2.47055900 | -0.25086900 |
| H | -0.80683800 | -2.49729500 | -1.18447500 |
| H | 0.43074900  | -3.32848700 | -0.21562400 |
| H | -0.95340700 | -2.54727200 | 0.57342300  |
| C | -0.23939400 | 2.47134300  | -0.25038800 |
| H | -0.80536100 | 2.49900700  | -1.18436400 |

|   |             |            |             |
|---|-------------|------------|-------------|
| H | -0.95296000 | 2.54763500 | 0.57342900  |
| H | 0.43191500  | 3.32903000 | -0.21394100 |

Vibrational frequencies

|           |           |           |
|-----------|-----------|-----------|
| -530.7758 | 33.2748   | 51.5340   |
| 114.1137  | 133.6636  | 169.7175  |
| 173.3901  | 204.6767  | 241.3243  |
| 248.1406  | 310.1226  | 317.6061  |
| 329.5405  | 408.4403  | 437.4933  |
| 444.8161  | 462.5964  | 476.9048  |
| 531.5051  | 539.7286  | 567.3337  |
| 589.6395  | 608.5698  | 629.9574  |
| 639.0353  | 669.7173  | 707.6745  |
| 853.7937  | 902.5263  | 904.0540  |
| 944.7146  | 975.9969  | 979.1891  |
| 1044.7488 | 1060.8109 | 1062.8499 |
| 1066.2953 | 1176.2576 | 1255.8605 |
| 1266.7996 | 1268.0825 | 1298.8874 |
| 1303.8196 | 1309.6624 | 1418.9023 |
| 1420.4713 | 1437.9107 | 1484.0206 |
| 1491.0846 | 1491.6872 | 1514.7906 |
| 1521.6472 | 1545.1229 | 1675.7664 |
| 2374.6428 | 3087.1775 | 3087.5080 |
| 3162.8668 | 3163.0850 | 3188.3735 |
| 3188.4924 | 3233.1913 | 3233.2977 |

<sup>2</sup>M17

|                                              |             |
|----------------------------------------------|-------------|
| Zero-point correction=                       | 0.016438    |
| Thermal correction to Energy=                | 0.020723    |
| Thermal correction to Enthalpy=              | 0.021667    |
| Thermal correction to Gibbs Free Energy=     | -0.011739   |
| Sum of electronic and zero-point Energies=   | -412.619846 |
| Sum of electronic and thermal Energies=      | -412.615561 |
| Sum of electronic and thermal Enthalpies=    | -412.614617 |
| Sum of electronic and thermal Free Energies= | -412.648023 |

Cartesian coordinates

|   |             |             |             |
|---|-------------|-------------|-------------|
| O | 0.78403000  | -0.00490300 | -1.14972700 |
| C | 0.00535800  | -0.00020000 | -0.03395000 |
| F | -0.77018100 | 1.07533600  | 0.02345700  |
| F | 0.84685500  | -0.00036800 | 0.99324900  |
| F | -0.77716100 | -1.07047600 | 0.02790700  |

Vibrational frequencies

|           |           |           |
|-----------|-----------|-----------|
| 179.5016  | 411.8124  | 581.7699  |
| 596.6682  | 625.3662  | 933.8322  |
| 1267.5493 | 1291.4738 | 1327.5976 |

### M18

|                                              |             |
|----------------------------------------------|-------------|
| Zero-point correction=                       | 0.143632    |
| Thermal correction to Energy=                | 0.153092    |
| Thermal correction to Enthalpy=              | 0.154036    |
| Thermal correction to Gibbs Free Energy=     | 0.108726    |
| Sum of electronic and zero-point Energies=   | -418.857541 |
| Sum of electronic and thermal Energies=      | -418.848081 |
| Sum of electronic and thermal Enthalpies=    | -418.847137 |
| Sum of electronic and thermal Free Energies= | -418.892447 |

### Cartesian coordinates

|   |             |             |             |
|---|-------------|-------------|-------------|
| N | -1.61916800 | -0.00001700 | -0.00000400 |
| C | -0.94659200 | -1.15728500 | -0.00000900 |
| C | 0.44840800  | -1.20697600 | 0.00000800  |
| H | 0.97384800  | -2.15468700 | 0.00001900  |
| C | 1.14493400  | 0.00002000  | 0.00001800  |
| C | 0.44837800  | 1.20699700  | 0.00001300  |
| H | 0.97379400  | 2.15472200  | 0.00001700  |
| C | -0.94662100 | 1.15726900  | 0.00000700  |
| C | 2.58706300  | 0.00003800  | 0.00000000  |
| N | 3.74386200  | 0.00000800  | -0.00001700 |
| C | -1.77243400 | -2.41389300 | 0.00000200  |
| H | -2.41843600 | -2.43522500 | 0.88136200  |
| H | -2.41831300 | -2.43529300 | -0.88145300 |
| H | -1.14531600 | -3.30616000 | 0.00005200  |
| C | -1.77249600 | 2.41385500  | -0.00000600 |
| H | -2.41839400 | 2.43524800  | 0.88143000  |
| H | -1.14540200 | 3.30613800  | -0.00009600 |
| H | -2.41847900 | 2.43515800  | -0.88138600 |

### Vibrational frequencies

|           |           |           |
|-----------|-----------|-----------|
| 92.8823   | 94.3035   | 128.1880  |
| 137.2670  | 200.9631  | 213.6939  |
| 282.2307  | 408.8231  | 410.2044  |
| 457.2133  | 545.6244  | 561.9481  |
| 586.4317  | 600.3949  | 635.3244  |
| 747.0467  | 896.1111  | 906.3242  |
| 942.9911  | 977.4522  | 1018.2713 |
| 1036.1439 | 1061.4236 | 1068.2720 |
| 1068.5980 | 1181.3687 | 1250.7657 |

|           |           |           |
|-----------|-----------|-----------|
| 1290.9143 | 1356.9072 | 1415.7264 |
| 1427.1032 | 1463.0458 | 1470.1688 |
| 1486.4592 | 1487.2621 | 1506.6844 |
| 1523.5001 | 1659.5065 | 1688.4456 |
| 2415.2940 | 3088.4342 | 3088.8975 |
| 3162.3658 | 3162.4028 | 3187.8160 |
| 3187.9816 | 3233.9352 | 3234.0068 |

## <sup>2</sup>M24

|                                              |             |             |
|----------------------------------------------|-------------|-------------|
| Zero-point correction=                       | 0.262094    |             |
| Thermal correction to Energy=                | 0.273696    |             |
| Thermal correction to Enthalpy=              | 0.274640    |             |
| Thermal correction to Gibbs Free Energy=     |             | 0.226687    |
| Sum of electronic and zero-point Energies=   |             | -483.320612 |
| Sum of electronic and thermal Energies=      | -483.309010 |             |
| Sum of electronic and thermal Enthalpies=    |             | -483.308066 |
| Sum of electronic and thermal Free Energies= |             | -483.356019 |

## Cartesian coordinates

|   |           |           |           |
|---|-----------|-----------|-----------|
| C | -1.249902 | -0.076807 | 0.040356  |
| C | -1.118035 | 1.384015  | 0.513437  |
| C | -0.068890 | 2.124301  | -0.304893 |
| C | 1.301513  | 1.503976  | -0.021985 |
| C | 1.265063  | -0.051357 | 0.032670  |
| H | -2.097487 | 1.876630  | 0.456560  |
| H | -0.307648 | 2.037393  | -1.370478 |
| H | 2.018324  | 1.837395  | -0.782380 |
| H | -0.058361 | 3.193153  | -0.062138 |
| H | -0.816481 | 1.410913  | 1.570483  |
| H | 1.673204  | 1.887047  | 0.937834  |
| N | 0.014897  | -0.539366 | -0.595617 |
| O | 0.019904  | -1.941295 | -0.668466 |
| C | -2.295076 | -0.164364 | -1.081660 |
| H | -2.224112 | -1.163411 | -1.518445 |
| H | -3.312354 | 0.004876  | -0.709077 |
| H | -2.084087 | 0.571991  | -1.864881 |
| C | -1.737830 | -0.961504 | 1.197414  |
| H | -1.076564 | -0.900726 | 2.065209  |
| H | -2.739952 | -0.649812 | 1.515690  |
| H | -1.757546 | -1.995521 | 0.852464  |
| C | 2.414482  | -0.595127 | -0.822578 |
| H | 3.374184  | -0.195772 | -0.473834 |
| H | 2.422409  | -1.684040 | -0.774317 |
| H | 2.272036  | -0.293602 | -1.866318 |

|   |          |           |          |
|---|----------|-----------|----------|
| C | 1.470885 | -0.576240 | 1.465297 |
| H | 1.178240 | -1.630337 | 1.458318 |
| H | 2.518047 | -0.488322 | 1.779793 |
| H | 0.861376 | -0.033296 | 2.194216 |

Vibrational frequencies

|           |           |           |
|-----------|-----------|-----------|
| 84.2494   | 147.2351  | 210.7397  |
| 229.3624  | 243.8278  | 267.4714  |
| 279.8619  | 302.1546  | 325.9771  |
| 329.1391  | 358.4862  | 367.5699  |
| 388.4091  | 399.4792  | 412.2112  |
| 467.7801  | 488.7664  | 514.9156  |
| 584.0561  | 604.8123  | 686.7027  |
| 794.0695  | 798.7779  | 847.1039  |
| 899.1969  | 927.5731  | 931.8916  |
| 937.1035  | 969.0504  | 973.5450  |
| 990.6637  | 999.2415  | 1044.1520 |
| 1072.4635 | 1079.9155 | 1088.6034 |
| 1114.7773 | 1174.4369 | 1205.4011 |
| 1228.8304 | 1243.2043 | 1259.8983 |
| 1272.8344 | 1287.6334 | 1316.3731 |
| 1354.4441 | 1362.4585 | 1367.7789 |
| 1376.4858 | 1381.9196 | 1383.2333 |
| 1393.8312 | 1472.5825 | 1475.8836 |
| 1483.5364 | 1489.2818 | 1493.6122 |
| 1501.1295 | 1504.8002 | 1506.6003 |
| 1510.4270 | 1522.3008 | 1525.0423 |
| 3038.2306 | 3041.4355 | 3042.7609 |
| 3045.0629 | 3051.6284 | 3056.0478 |
| 3065.7359 | 3083.1690 | 3085.3899 |
| 3112.6770 | 3115.1401 | 3116.5332 |
| 3123.3251 | 3143.9840 | 3155.3874 |
| 3157.1789 | 3176.6072 | 3180.3472 |

**<sup>2</sup>M25**

|                                              |             |
|----------------------------------------------|-------------|
| Zero-point correction=                       | 0.086936    |
| Thermal correction to Energy=                | 0.093089    |
| Thermal correction to Enthalpy=              | 0.094033    |
| Thermal correction to Gibbs Free Energy=     | 0.055983    |
| Sum of electronic and zero-point Energies=   | -340.038078 |
| Sum of electronic and thermal Energies=      | -340.031925 |
| Sum of electronic and thermal Enthalpies=    | -340.030981 |
| Sum of electronic and thermal Free Energies= | -340.069031 |

Cartesian coordinates

|   |             |             |             |
|---|-------------|-------------|-------------|
| N | 2.03471400  | 0.00001400  | 0.00036200  |
| C | 1.51718300  | -1.20282200 | -0.00005600 |
| C | 0.12147500  | -1.22239400 | -0.00011200 |
| H | -0.39450500 | -2.17488400 | -0.00003000 |
| C | -0.55864900 | -0.00001300 | -0.00023800 |
| C | 0.12145200  | 1.22238300  | -0.00011200 |
| H | -0.39454600 | 2.17486200  | -0.00003000 |
| C | 1.51716100  | 1.20284000  | -0.00005600 |
| H | 2.16101400  | 2.07630800  | -0.00022100 |
| H | 2.16105300  | -2.07627700 | -0.00022100 |
| C | -2.00026600 | -0.00003200 | 0.00009300  |
| N | -3.15516400 | 0.00001700  | 0.00012300  |

Vibrational frequencies

|           |           |           |
|-----------|-----------|-----------|
| 148.0551  | 163.9362  | 385.5168  |
| 386.0175  | 469.0202  | 510.9555  |
| 564.7753  | 618.1961  | 685.4817  |
| 719.8314  | 771.5708  | 839.9497  |
| 977.2048  | 995.7298  | 1004.4513 |
| 1098.2544 | 1116.7171 | 1184.6980 |
| 1230.9313 | 1289.2634 | 1320.5375 |
| 1438.4129 | 1492.4012 | 1615.5698 |
| 1666.8316 | 2435.3606 | 3249.6802 |
| 3252.9008 | 3262.6248 | 3265.7763 |

**<sup>2</sup>M26**

|                                              |             |
|----------------------------------------------|-------------|
| Zero-point correction=                       | 0.036648    |
| Thermal correction to Energy=                | 0.039542    |
| Thermal correction to Enthalpy=              | 0.040486    |
| Thermal correction to Gibbs Free Energy=     | 0.014416    |
| Sum of electronic and zero-point Energies=   | -115.091355 |
| Sum of electronic and thermal Energies=      | -115.088462 |
| Sum of electronic and thermal Enthalpies=    | -115.087518 |
| Sum of electronic and thermal Free Energies= | -115.113588 |

Cartesian coordinates

|   |             |             |             |
|---|-------------|-------------|-------------|
| O | -0.79653600 | -0.00003500 | -0.00004900 |
| C | 0.53868200  | -0.00007100 | -0.00016500 |
| H | 1.04744200  | -0.96402100 | -0.31805700 |
| H | 1.04690700  | 0.75837800  | -0.67483900 |
| H | 1.04584400  | 0.20635000  | 0.99427600  |

Vibrational frequencies

|           |           |           |
|-----------|-----------|-----------|
| 1208.6810 | 1223.6375 | 1226.6429 |
| 1482.4803 | 1486.1651 | 1558.7057 |
| 2599.2091 | 2602.6124 | 2698.5779 |

## <sup>2</sup>M27

|                                              |             |
|----------------------------------------------|-------------|
| Zero-point correction=                       | 0.142435    |
| Thermal correction to Energy=                | 0.152216    |
| Thermal correction to Enthalpy=              | 0.153160    |
| Thermal correction to Gibbs Free Energy=     | 0.106480    |
| Sum of electronic and zero-point Energies=   | -418.596079 |
| Sum of electronic and thermal Energies=      | -418.586298 |
| Sum of electronic and thermal Enthalpies=    | -418.585354 |
| Sum of electronic and thermal Free Energies= | -418.632034 |

## Cartesian coordinates

|   |             |             |             |
|---|-------------|-------------|-------------|
| N | -1.44190000 | 0.00000700  | -0.00082300 |
| C | -0.94500300 | -1.21883400 | -0.00412800 |
| C | 0.45581900  | -1.22240700 | -0.00161400 |
| H | 0.97856200  | -2.17190100 | -0.00414500 |
| C | 1.13220200  | -0.00000400 | 0.00097200  |
| C | 0.45584000  | 1.22239400  | -0.00158200 |
| H | 0.97858800  | 2.17188500  | -0.00413600 |
| C | -0.94499500 | 1.21882900  | -0.00414400 |
| C | 2.57444600  | -0.00001000 | 0.00110300  |
| N | 3.72951100  | -0.00002400 | 0.00155100  |
| C | -1.83525300 | -2.42266500 | 0.00123100  |
| H | -2.31284700 | -2.51385900 | 0.97930500  |
| H | -2.60825500 | -2.31813100 | -0.76091600 |
| H | -1.23777100 | -3.31056200 | -0.19598100 |
| C | -1.83520900 | 2.42269400  | 0.00121400  |
| H | -2.31082600 | 2.51527800  | 0.98012300  |
| H | -1.23808300 | 3.31029300  | -0.19840600 |
| H | -2.60971800 | 2.31714000  | -0.75924000 |

## Vibrational frequencies

|           |           |           |
|-----------|-----------|-----------|
| 87.3698   | 92.1838   | 117.7722  |
| 136.9437  | 180.6598  | 196.8981  |
| 247.5646  | 375.0125  | 404.7427  |
| 466.8402  | 495.0128  | 512.9134  |
| 580.4494  | 591.9745  | 593.6192  |
| 682.4453  | 849.7889  | 896.2353  |
| 922.0613  | 958.4750  | 1002.4886 |
| 1031.0521 | 1059.5227 | 1060.4526 |
| 1072.5654 | 1178.5109 | 1246.1740 |



|           |           |           |
|-----------|-----------|-----------|
| 1282.1020 | 1357.1335 | 1405.0994 |
| 1410.3854 | 1418.6009 | 1453.3421 |
| 1470.9078 | 1473.5548 | 1485.3748 |
| 1500.2068 | 1626.0887 | 1660.6427 |
| 2433.5172 | 3101.6253 | 3101.9084 |
| 3189.8951 | 3190.1005 | 3216.1395 |
| 3216.5130 | 3244.3260 | 3244.3555 |

## <sup>2</sup>M28

|                                              |             |
|----------------------------------------------|-------------|
| Zero-point correction=                       | 0.016513    |
| Thermal correction to Energy=                | 0.020500    |
| Thermal correction to Enthalpy=              | 0.021444    |
| Thermal correction to Gibbs Free Energy=     | -0.010652   |
| Sum of electronic and zero-point Energies=   | -412.852716 |
| Sum of electronic and thermal Energies=      | -412.848729 |
| Sum of electronic and thermal Enthalpies=    | -412.847785 |
| Sum of electronic and thermal Free Energies= | -412.879881 |

### Cartesian coordinates

|   |             |             |             |
|---|-------------|-------------|-------------|
| O | -1.40360200 | -0.02422200 | -0.00526500 |
| C | -0.17358000 | -0.00295700 | -0.00039300 |
| F | 0.43553300  | 1.18652400  | -0.43198300 |
| F | 0.47428700  | -0.95702600 | -0.80216400 |
| F | 0.45354700  | -0.20599600 | 1.23908900  |

### Vibrational frequencies

|           |           |           |
|-----------|-----------|-----------|
| 428.8719  | 430.1694  | 610.3217  |
| 612.1685  | 619.6118  | 868.6780  |
| 1012.1179 | 1014.3334 | 1652.2408 |

## <sup>2</sup>M29

|                                             |              |
|---------------------------------------------|--------------|
| Sum of electronic and zero-point Energies   | -1122.545755 |
| Thermal correction to Energy                | 0.251118     |
| Thermal correction to Gibbs Free Energy     | 0.189516     |
| Thermal correction to Enthalpy              | 0.252063     |
| Zero-point correction                       | 0.235508     |
| Sum of electronic and thermal Energies      | -1122.530145 |
| Sum of electronic and thermal Enthalpies    | -1122.529201 |
| Sum of electronic and thermal Free Energies | -1122.591747 |

### Cartesian coordinates

|   |          |           |           |
|---|----------|-----------|-----------|
| N | 2.244942 | -0.256455 | -0.834583 |
| C | 2.631404 | -1.514411 | -0.357519 |
| C | 3.878174 | -1.702458 | 0.152257  |

|   |           |           |           |
|---|-----------|-----------|-----------|
| H | 4.149545  | -2.700795 | 0.477464  |
| C | 4.800191  | -0.628667 | 0.256310  |
| C | 4.371185  | 0.642771  | -0.180077 |
| H | 5.031149  | 1.501747  | -0.119231 |
| C | 3.121325  | 0.835804  | -0.692364 |
| H | 2.743451  | 1.782785  | -1.055668 |
| H | 5.787792  | -0.775578 | 0.671954  |
| N | 0.879168  | -0.040022 | -0.956802 |
| H | 0.663547  | 0.487949  | -1.804320 |
| S | 0.162573  | 0.735533  | 0.406228  |
| O | 0.271650  | 2.189951  | 0.311217  |
| O | 0.734110  | 0.050485  | 1.559337  |
| C | -1.529338 | 0.279756  | 0.186156  |
| C | -2.467776 | 1.261059  | -0.109078 |
| C | -1.885248 | -1.061261 | 0.332281  |
| C | -3.798937 | 0.883578  | -0.262469 |
| H | -2.158463 | 2.295653  | -0.208878 |
| C | -3.215902 | -1.415188 | 0.173767  |
| H | -1.130969 | -1.806410 | 0.565761  |
| C | -4.188651 | -0.450629 | -0.127172 |
| H | -4.545447 | 1.639083  | -0.487301 |
| H | -3.511429 | -2.454091 | 0.286181  |
| C | -5.624079 | -0.860687 | -0.317389 |
| H | -5.937539 | -1.559524 | 0.462010  |
| H | -6.289337 | 0.004192  | -0.299960 |
| H | -5.750600 | -1.365768 | -1.280060 |
| H | 1.878193  | -2.283922 | -0.460552 |

#### Vibrational frequencies

|           |           |           |
|-----------|-----------|-----------|
| 20.7839   | 26.3026   | 47.1524   |
| 58.7083   | 73.6534   | 99.1828   |
| 150.5216  | 176.9276  | 198.4646  |
| 266.5398  | 277.2469  | 318.4216  |
| 333.5142  | 355.2092  | 409.7870  |
| 415.5800  | 445.0268  | 457.6568  |
| 481.9826  | 507.2037  | 537.5701  |
| 582.2175  | 624.7250  | 633.6567  |
| 642.6623  | 648.6134  | 664.3413  |
| 694.8516  | 718.4546  | 750.9351  |
| 775.3267  | 821.7913  | 829.4614  |
| 839.1214  | 861.4922  | 884.8611  |
| 961.3875  | 964.3390  | 984.5965  |
| 1002.3898 | 1012.6322 | 1015.0086 |
| 1024.6440 | 1034.3685 | 1063.9085 |

|           |           |           |
|-----------|-----------|-----------|
| 1100.3158 | 1106.9348 | 1118.1710 |
| 1140.4526 | 1173.8066 | 1207.2660 |
| 1208.9889 | 1253.0655 | 1253.9637 |
| 1317.4699 | 1327.6992 | 1345.7367 |
| 1350.3519 | 1364.3390 | 1373.9224 |
| 1421.1452 | 1450.4377 | 1454.5717 |
| 1490.4207 | 1492.7905 | 1499.1561 |
| 1551.5387 | 1569.0017 | 1669.9206 |
| 1692.6507 | 1698.2538 | 3074.2537 |
| 3145.0735 | 3172.9679 | 3204.7943 |
| 3213.7793 | 3222.8915 | 3223.7633 |
| 3224.8195 | 3234.7935 | 3264.0333 |
| 3274.4225 | 3280.1389 | 3514.8466 |

## <sup>2</sup>TS11

|                                             |              |
|---------------------------------------------|--------------|
| Sum of electronic and zero-point Energies   | -1122.531902 |
| Thermal correction to Energy                | 0.249406     |
| Thermal correction to Gibbs Free Energy     | 0.188959     |
| Thermal correction to Enthalpy              | 0.250350     |
| Zero-point correction                       | 0.234121     |
| Sum of electronic and thermal Energies      | -1122.516617 |
| Sum of electronic and thermal Enthalpies    | -1122.515673 |
| Sum of electronic and thermal Free Energies | -1122.577065 |

## Cartesian coordinates

|   |           |           |           |
|---|-----------|-----------|-----------|
| N | -2.479170 | 0.168029  | -1.149883 |
| C | -2.841723 | 1.421545  | -0.738328 |
| C | -3.869025 | 1.618544  | 0.156539  |
| H | -4.136190 | 2.633050  | 0.430594  |
| C | -4.556314 | 0.520240  | 0.685863  |
| C | -4.189567 | -0.757501 | 0.254085  |
| H | -4.712018 | -1.640426 | 0.605565  |
| C | -3.166045 | -0.910640 | -0.657100 |
| H | -2.853788 | -1.878612 | -1.032645 |
| H | -5.354188 | 0.656989  | 1.405422  |
| N | -0.794986 | 0.031279  | -1.153617 |
| H | -0.620885 | -0.653793 | -1.893290 |
| S | -0.206852 | -0.569229 | 0.294029  |
| O | -0.370177 | -2.022322 | 0.390969  |
| O | -0.793962 | 0.268838  | 1.337968  |
| C | 1.524857  | -0.217915 | 0.170936  |
| C | 2.421565  | -1.254850 | -0.065650 |
| C | 1.952882  | 1.102023  | 0.307103  |
| C | 3.776772  | -0.956185 | -0.165722 |

|   |           |           |           |
|---|-----------|-----------|-----------|
| H | 2.058890  | -2.273039 | -0.155891 |
| C | 3.308526  | 1.378948  | 0.202514  |
| H | 1.233091  | 1.891360  | 0.499389  |
| C | 4.237016  | 0.357355  | -0.037875 |
| H | 4.489447  | -1.756658 | -0.340792 |
| H | 3.657520  | 2.401385  | 0.313076  |
| C | 5.701956  | 0.674009  | -0.179074 |
| H | 5.937979  | 0.927339  | -1.217731 |
| H | 5.982883  | 1.528147  | 0.440691  |
| H | 6.319413  | -0.181476 | 0.102149  |
| H | -2.265723 | 2.232669  | -1.167742 |

Vibrational frequencies

|           |           |           |
|-----------|-----------|-----------|
| -738.1799 | 26.5774   | 33.4981   |
| 53.0186   | 70.4820   | 78.2611   |
| 95.0827   | 153.1163  | 173.5496  |
| 218.9033  | 244.3643  | 273.8824  |
| 323.8619  | 337.4126  | 376.3300  |
| 406.7600  | 413.6527  | 440.8894  |
| 452.3971  | 501.9348  | 527.5301  |
| 554.1925  | 574.1502  | 641.5965  |
| 644.9958  | 674.6176  | 683.3971  |
| 713.0728  | 724.4536  | 756.9766  |
| 827.7137  | 838.0068  | 849.6231  |
| 868.3713  | 870.0348  | 906.4900  |
| 952.7584  | 982.4511  | 988.1000  |
| 1001.8493 | 1006.7517 | 1021.6885 |
| 1029.7591 | 1033.6505 | 1067.1290 |
| 1070.2442 | 1107.6382 | 1114.7727 |
| 1135.3898 | 1159.7180 | 1166.8699 |
| 1205.0271 | 1212.4201 | 1229.7321 |
| 1252.4912 | 1308.9330 | 1324.7394 |
| 1339.0548 | 1359.4620 | 1367.5559 |
| 1424.3769 | 1451.7040 | 1481.8798 |
| 1492.0929 | 1497.3448 | 1499.3304 |
| 1547.2900 | 1594.2273 | 1646.9583 |
| 1667.9518 | 1688.2839 | 3081.3360 |
| 3153.2269 | 3176.8414 | 3207.0038 |
| 3212.1892 | 3223.3842 | 3229.9089 |
| 3232.9771 | 3233.5848 | 3242.1564 |
| 3244.5237 | 3254.3865 | 3516.7228 |

**<sup>2</sup>M30**

|                                           |             |
|-------------------------------------------|-------------|
| Sum of electronic and zero-point Energies | -874.454393 |
|-------------------------------------------|-------------|

|                                             |             |
|---------------------------------------------|-------------|
| Thermal correction to Energy                | 0.152077    |
| Thermal correction to Gibbs Free Energy     | 0.105766    |
| Thermal correction to Enthalpy              | 0.153022    |
| Zero-point correction                       | 0.142202    |
| Sum of electronic and thermal Energies      | -874.444517 |
| Sum of electronic and thermal Enthalpies    | -874.443573 |
| Sum of electronic and thermal Free Energies | -874.490829 |

#### Cartesian coordinates

|   |           |           |           |
|---|-----------|-----------|-----------|
| N | -2.454363 | 0.117181  | 1.497236  |
| H | -1.710505 | 0.554902  | 2.060799  |
| S | -1.911759 | -0.020386 | -0.089900 |
| O | -2.387137 | 1.202728  | -0.730939 |
| O | -2.371012 | -1.318350 | -0.560984 |
| C | -0.145662 | -0.013647 | -0.066343 |
| C | 0.527114  | 1.208064  | -0.081018 |
| C | 0.534146  | -1.227036 | -0.022173 |
| C | 1.914139  | 1.201279  | -0.045570 |
| H | -0.028548 | 2.138555  | -0.134555 |
| C | 1.924126  | -1.209324 | 0.012726  |
| H | -0.016321 | -2.161568 | -0.027774 |
| C | 2.629529  | -0.002538 | 0.004947  |
| H | 2.454619  | 2.142920  | -0.065009 |
| H | 2.469583  | -2.147449 | 0.040824  |
| C | 4.133256  | 0.014263  | 0.060108  |
| H | 4.474013  | 0.342399  | 1.046968  |
| H | 4.548688  | -0.976852 | -0.129208 |
| H | 4.542469  | 0.711603  | -0.674974 |

#### Vibrational frequencies

|           |           |           |
|-----------|-----------|-----------|
| -18.6515  | 49.7529   | 85.9781   |
| 164.9673  | 198.7572  | 243.9514  |
| 286.8421  | 325.4834  | 341.1287  |
| 375.2608  | 414.1598  | 442.1202  |
| 462.8722  | 522.4331  | 539.4413  |
| 640.4540  | 648.0800  | 711.6882  |
| 769.8225  | 829.4595  | 840.3788  |
| 867.7138  | 991.0976  | 1007.5099 |
| 1016.8240 | 1033.8283 | 1065.5208 |
| 1100.4363 | 1120.0204 | 1140.5995 |
| 1177.5131 | 1209.8556 | 1252.5545 |
| 1327.2933 | 1347.5801 | 1363.0399 |
| 1421.5576 | 1453.1458 | 1490.9097 |
| 1499.7789 | 1547.2246 | 1668.4625 |

|           |           |           |
|-----------|-----------|-----------|
| 1687.5480 | 3076.9585 | 3149.0245 |
| 3175.9294 | 3209.1428 | 3213.0706 |
| 3230.8111 | 3234.7712 | 3446.6875 |

### **<sup>2</sup>M31**

|                                             |             |
|---------------------------------------------|-------------|
| Sum of electronic and zero-point Energies   | -248.093354 |
| Thermal correction to Energy                | 0.094015    |
| Thermal correction to Gibbs Free Energy     | 0.062380    |
| Thermal correction to Enthalpy              | 0.094959    |
| Zero-point correction                       | 0.089768    |
| Sum of electronic and thermal Energies      | -248.089106 |
| Sum of electronic and thermal Enthalpies    | -248.088162 |
| Sum of electronic and thermal Free Energies | -248.120741 |

### Cartesian coordinates

|   |           |           |           |
|---|-----------|-----------|-----------|
| N | 0.003047  | -1.417447 | -0.000197 |
| C | -1.139084 | -0.722536 | -0.000018 |
| C | -1.197606 | 0.668757  | 0.000175  |
| H | -2.156614 | 1.174347  | 0.000271  |
| C | -0.002913 | 1.381672  | -0.000219 |
| C | 1.194737  | 0.673744  | -0.000061 |
| H | 2.151690  | 1.183229  | -0.000020 |
| C | 1.142097  | -0.717830 | 0.000189  |
| H | 2.061936  | -1.298295 | 0.000481  |
| H | -0.005262 | 2.466912  | 0.000214  |
| H | -2.056470 | -1.306908 | 0.000040  |

### Vibrational frequencies

|           |           |           |
|-----------|-----------|-----------|
| 390.9716  | 418.3935  | 611.7711  |
| 666.5186  | 724.3971  | 769.2946  |
| 911.2864  | 984.9293  | 1020.1786 |
| 1027.5539 | 1038.3710 | 1063.0689 |
| 1099.3458 | 1105.1070 | 1166.7906 |
| 1251.6463 | 1306.0053 | 1389.7308 |
| 1494.4265 | 1538.5569 | 1675.0904 |
| 1684.7610 | 3196.5723 | 3199.0882 |
| 3211.6739 | 3225.6259 | 3232.2508 |

### **M5'**

|                                            |              |
|--------------------------------------------|--------------|
| Zero-point correction=                     | 1.072737     |
| Thermal correction to Energy=              | 1.128466     |
| Thermal correction to Enthalpy=            | 1.129410     |
| Thermal correction to Gibbs Free Energy=   | 0.988252     |
| Sum of electronic and zero-point Energies= | -3150.491817 |

Sum of electronic and thermal Energies= -3150.436088  
Sum of electronic and thermal Enthalpies= -3150.435144  
Sum of electronic and thermal Free Energies= -3150.576302

Cartesian coordinates

C -6.743384 -0.558164 -1.989576  
C -6.009001 0.597036 -2.670742  
C -5.354595 1.587360 -1.702299  
C -5.848609 -1.558852 -1.256858  
C -4.158186 1.048068 -0.970574  
C -5.191105 -1.036051 0.030653  
C -4.065350 -0.066726 -0.208289  
H -7.308268 -1.103110 -2.753318  
H -6.725560 1.156407 -3.280803  
H -6.095623 1.912350 -0.959830  
H -5.073511 -1.920993 -1.942319  
H -5.957434 -0.534103 0.637100  
C -1.923001 0.781861 0.102349  
H -7.484120 -0.151749 -1.287358  
H -5.247448 0.202948 -3.354289  
H -5.053762 2.485277 -2.249518  
H -6.455729 -2.427777 -0.981434  
H -4.830282 -1.875188 0.628007  
N -2.787235 -0.202747 0.380780  
C -2.520819 -1.368099 1.222530  
C -2.392033 -2.614171 0.600013  
C -2.563941 -1.207863 2.616666  
C -2.238672 -3.730341 1.431953  
C -2.417496 -2.352291 3.395873  
C -2.245188 -3.605567 2.811382  
H -2.114574 -4.710610 0.981290  
H -2.434043 -2.267131 4.477140  
H -2.127741 -4.484362 3.437989  
C -2.438263 -2.821628 -0.907047  
C -3.409287 -3.950907 -1.280947  
H -3.581678 -3.952380 -2.361579  
H -2.990649 -4.926934 -1.016421  
H -4.376233 -3.853460 -0.778763  
C -2.793975 0.150606 3.252880  
S -2.655819 1.895097 -0.965950  
H -2.794201 -1.897166 -1.375911  
H -2.288096 0.893906 2.633039  
C -1.047866 -3.117908 -1.479589  
H -0.627391 -4.014759 -1.011039

H -1.126103 -3.313479 -2.555655  
H -0.367367 -2.275980 -1.327401  
C -2.195090 0.267943 4.654905  
H -2.225541 1.312708 4.977489  
H -2.757327 -0.321819 5.386818  
H -1.152866 -0.061903 4.670861  
C -4.292028 0.484664 3.293311  
H -4.452037 1.456969 3.769282  
H -4.727071 0.528801 2.290836  
H -4.837423 -0.271594 3.868120  
C -0.481857 0.922802 0.699366  
O -0.154773 -0.120507 1.423785  
C -0.464814 2.247161 1.551045  
C -0.913463 3.521324 1.177856  
C 0.058468 2.107644 2.843012  
C -0.825426 4.605993 2.049548  
H -1.325144 3.704420 0.192878  
C 0.150223 3.184868 3.719839  
H 0.380929 1.111018 3.122306  
C -0.291721 4.445756 3.325879  
H -1.179928 5.579775 1.724867  
H 0.562383 3.037375 4.714270  
H -0.227926 5.291136 4.004152  
C 6.743658 -0.558474 1.989106  
C 6.009457 0.596869 2.670227  
C 5.354984 1.587105 1.701742  
C 5.848709 -1.559196 1.256645  
C 4.158418 1.047809 0.970277  
C 5.191048 -1.036507 -0.030835  
C 4.065387 -0.067078 0.208146  
H 7.308614 -1.103362 2.752837  
H 6.726145 1.156275 3.280103  
H 6.095925 1.911915 0.959109  
H 5.073695 -1.921206 1.942268  
H 5.957327 -0.534673 -0.637439  
C 1.923089 0.781676 -0.102341  
H 7.484322 -0.152203 1.286729  
H 5.247977 0.202930 3.353941  
H 5.054314 2.485134 2.248868  
H 6.455731 -2.428193 0.981234  
H 4.830099 -1.875691 -0.628047  
N 2.787173 -0.203071 -0.380714  
C 2.520509 -1.368483 -1.222299  
C 2.391538 -2.614464 -0.599635



C 2.563571 -1.208410 -2.616451  
C 2.238025 -3.730710 -1.431447  
C 2.416978 -2.352906 -3.395529  
C 2.244541 -3.606095 -2.810893  
H 2.113767 -4.710906 -0.980670  
H 2.433509 -2.267860 -4.476807  
H 2.126962 -4.484944 -3.437399  
C 2.437594 -2.821731 0.907456  
C 3.408757 -3.950786 1.281647  
H 3.580980 -3.952083 2.362306  
H 2.990332 -4.926923 1.017192  
H 4.375766 -3.853230 0.779599  
C 2.793775 0.149955 -3.252818  
S 2.656135 1.894995 0.965709  
H 2.793305 -1.897150 1.376255  
H 2.287951 0.893390 -2.633089  
C 1.047163 -3.118178 1.479831  
H 0.626974 -4.015237 1.011422  
H 1.125272 -3.313479 2.555955  
H 0.366488 -2.276447 1.327323  
C 2.194965 0.267174 -4.654886  
H 2.225583 1.311885 -4.977627  
H 2.757152 -0.322781 -5.386684  
H 1.152694 -0.062524 -4.670838  
C 4.291869 0.483825 -3.293211  
H 4.452022 1.456062 -3.769270  
H 4.726872 0.528000 -2.290719  
H 4.837193 -0.272559 -3.867920  
C 0.481950 0.922727 -0.699353  
O 0.154796 -0.120557 -1.423768  
C 0.465095 2.247057 -1.551082  
C 0.913728 3.521221 -1.177880  
C -0.057870 2.107465 -2.843168  
C 0.825933 4.605832 -2.049666  
H 1.325215 3.704359 -0.192827  
C -0.149387 3.184634 -3.720088  
H -0.380289 1.110828 -3.122482  
C 0.292506 4.445533 -3.326107  
H 1.180411 5.579619 -1.724972  
H -0.561318 3.037082 -4.714606  
H 0.228911 5.290868 -4.004455

Vibrational frequencies

22.1440 24.8187 36.4987

38.7568 46.6528 58.1038  
59.7020 59.8817 69.0557  
73.5106 77.7629 80.9017  
81.0843 84.8607 85.3253  
92.1040 94.8808 99.4290  
108.2294 110.4054 117.5818  
126.5919 135.6383 140.6575  
142.5495 144.7722 148.7495  
153.7511 162.1202 167.5614  
169.3604 172.0005 176.4754  
195.3993 206.9911 216.7358  
222.7072 225.0516 230.9885  
241.6846 243.7602 246.1988  
246.6147 252.2047 259.1630  
259.9998 268.2545 268.7501  
279.3883 286.8747 288.7897  
292.1601 300.8225 306.3756  
311.6231 312.9379 318.9925  
326.9157 328.0446 331.0870  
333.5142 337.3078 341.5662  
353.7328 358.3272 361.0244  
363.4743 381.8343 390.5076  
400.1643 404.8256 417.7930  
421.3919 429.8373 433.7450  
437.4460 441.8937 445.8400  
460.9175 464.3478 472.2094  
480.4521 494.3359 495.7185  
504.2255 506.8196 511.5367  
526.8734 534.4634 536.2445  
543.5467 564.6977 567.8730  
571.6783 585.5758 585.7138  
606.1562 609.9139 616.2392  
618.4992 628.7556 629.3129  
646.7519 656.8969 659.5633  
669.9996 678.8049 683.4000  
711.7401 713.0950 718.1787  
722.9474 729.5906 732.7151  
743.8806 753.8317 781.4852  
782.0943 793.0009 794.1730  
811.9497 818.9358 819.8879  
823.6782 834.2511 834.7109  
836.0574 838.8629 839.9144  
874.9008 887.8582 888.0879  
891.9582 892.1585 901.8139

907.1453 918.5946 919.9922  
926.9932 927.5195 929.2221  
934.8726 938.7151 939.1030  
948.8389 949.1010 961.0222  
962.2784 969.4938 972.2648  
975.1453 976.3371 980.8859  
982.1039 982.2381 982.3505  
983.8071 995.9726 1000.0993  
1000.5002 1012.0272 1014.8005  
1015.5305 1016.1855 1016.9797  
1017.0775 1028.7576 1029.6414  
1054.3768 1058.4066 1068.5931  
1069.7313 1074.5063 1075.3892  
1084.0540 1085.2880 1088.9468  
1095.0461 1097.8239 1100.5190  
1105.0229 1106.1450 1127.6369  
1127.8612 1135.5695 1135.6572  
1145.0647 1147.0602 1148.8760  
1150.8296 1152.1953 1153.9853  
1167.4977 1167.6660 1169.9200  
1170.5956 1174.7585 1174.7958  
1180.4859 1180.5904 1192.0726  
1192.7247 1202.0579 1203.3970  
1212.5419 1213.3655 1239.3428  
1240.0692 1247.7523 1249.3340  
1260.2018 1260.2785 1281.5719  
1286.7460 1286.9079 1291.6113  
1292.3971 1297.5702 1298.3996  
1305.9486 1308.2725 1308.4957  
1327.3400 1327.4822 1329.5355  
1330.1971 1330.9157 1331.2067  
1333.0461 1334.1785 1338.8423  
1340.6006 1352.8159 1353.6109  
1373.4062 1373.6993 1381.6105  
1381.6377 1385.1649 1385.1690  
1390.9981 1391.2159 1402.4981  
1402.5918 1405.6151 1405.7408  
1406.6653 1406.7191 1414.4050  
1415.3036 1417.0175 1417.0639  
1421.3537 1421.3696 1432.7613  
1434.3683 1457.0706 1459.1517  
1480.7014 1480.7861 1482.4872  
1484.0236 1485.1790 1485.6018  
1485.6441 1486.3896 1486.9701

1489.3228 1490.2082 1491.2173  
1491.6090 1494.7810 1496.1446  
1498.2196 1498.2284 1499.7460  
1503.2179 1503.5359 1508.1303  
1508.2132 1512.4710 1512.8844  
1515.9518 1517.0948 1517.9976  
1520.0795 1528.4713 1531.1808  
1532.9205 1535.4782 1536.1061  
1594.2297 1662.0979 1663.5432  
1676.2003 1676.2510 1683.6519  
1683.7499 1686.8899 1687.1828  
1694.4122 1694.7300 3044.8391  
3045.9987 3056.9319 3056.9591  
3058.9782 3058.9892 3061.0088  
3061.0199 3061.2398 3061.2698  
3061.8335 3061.8360 3063.7184  
3063.7494 3067.7485 3067.7651  
3076.6586 3076.6818 3090.7736  
3090.7911 3110.9753 3110.9820  
3117.7696 3117.7861 3118.6685  
3120.9815 3125.7302 3125.7375  
3126.2370 3126.2545 3133.6313  
3133.6477 3137.4515 3137.5283  
3139.3426 3139.3471 3149.0445  
3149.0671 3151.1444 3151.1647  
3154.2581 3154.2717 3157.7375  
3157.7498 3160.1365 3160.1639  
3174.5317 3178.1846 3198.6484  
3198.6612 3199.3770 3199.4034  
3209.3873 3209.4318 3220.2360  
3220.4396 3226.3695 3226.3934  
3231.2881 3231.3149 3234.7058  
3234.7643 3245.7677 3246.9833

## II Supplementary References

1. M. J. Frisch, G. W. Trucks, H. B. Schlegel, G. E. Scuseria, M. A. Robb, J. R. Cheeseman, G. Scalmani, V. Barone, G. A. Petersson, H. Nakatsuji, X. Li, M. Caricato, A. V. Marenich, J. Bloino, B. G. Janesko, R. Gomperts, B. Mennucci, H. P. Hratchian, J. V. Ortiz, A. F. Izmaylov, J. L. Sonnenberg, D. Williams-Young, F. Ding, F. Lipparini, F. Egidi, J. Goings, B. Peng, A. Petrone, T. Henderson, D. Ranasinghe, V. G. Zakrzewski, J. Gao, N. Rega, G. Zheng, W. Liang, M. Hada, M. Ehara, K. Toyota, R. Fukuda, J. Hasegawa, M. Ishida, T. Nakajima, Y. Honda, O. Kitao, H. Nakai, T. Vreven, K. Throssell, J. A. Montgomery, Jr., J. E. Peralta, F. Ogliaro, M. J. Bearpark, J. J. Heyd, E. N. Brothers, K. N. Kudin, V. N. Staroverov, T. A. Keith, R. Kobayashi, J. Normand, K.

- Raghavachari, A. P. Rendell, J. C. Burant, S. S. Iyengar, J. Tomasi, M. Cossi, J. M. Millam, M. Klene, C. Adamo, R. Cammi, J. W. Ochterski, R. L. Martin, K. Morokuma, O. Farkas, J. B. Foresman, and D. J. Fox, Gaussian 16, Revision A.03, Gaussian, Inc., Wallingford CT, **2016**.
2. (a) Zhao, Y. and Truhlar, D. G. Exploring the limit of accuracy of the global hybrid meta density functional for main-group thermochemistry, kinetics, and noncovalent interactions. *J. Chem. Theory Comput.* **2008**, 4, 1849-1868; (b) Y. Zhao and D. G. Truhlar, The M06 suite of density functionals for main group thermochemistry, thermochemical kinetics, noncovalent interactions, excited states, and transition elements: two new functionals and systematic testing of four M06-class functionals and 12 other functionals. *Theor. Chem. Acc.* **2008**, 120, 215-241; (c) Y. Zhao, D. G. Truhlar, Density functionals with broad applicability in chemistry. *Acc. Chem. Res.* **2008**, 41, 157-167.
3. (a) V. Barone and M. J. Cossi, Quantum calculation of molecular energies and energy gradients in solution by a conductor solvent model. *Chem. Phys. Chem. A* **1998**, 102, 1995-2001; (b) B. Mennucci, J. Tomasi, Continuum solvation models: A new approach to the problem of solute's charge distribution and cavity boundaries. *J. Chem. Phys.* **1997**, 106, 5151-5158.
4. Chemcraft—graphical software for visualization of quantum chemistry computations, <https://www.chemcraftprog.com>.
5. A. V. Marenich, C. J. Cramer, D. G. Truhlar, Universal solvation model based on solute electron density and on a continuum model of the solvent defined by the bulk dielectric constant and atomic surface tensions. *J. Phys. Chem. B* **2009**, 113, 6378-6396.
6. J.-D. Chai, M. Head-Gordon, Long-range corrected hybrid density functionals with damped atom–atom dispersion corrections. *Phys. Chem. Chem. Phys.* **2008**, 10, 6615-6620.
7. (a) Bartmess, J. E. Thermodynamics of the electron and the proton. *J. Phys. Chem.* **1994**, 98, 6420-6424; (b) Bartmess, J. E. Mixtures including unsymmetrical electrolytes. [Erratum to document cited in Ca 117(22):221099a]. *J. Phys. Chem.* **1995**, 99, 6755-6755.
8. Isse, A. A. and Gennaro, A. Absolute potential of the standard hydrogen electrode and the problem of interconversion of potentials in different solvents. *J. Phys. Chem. B* **2010**, 114, 7894-7899.
9. Diggle, J. W. and Parker, A. J. Liquid junction potentials in electrochemical cells involving a dissimilar solvent junction. *Aust. J. Chem.* **1974**, 27, 1617-1621
